# Supplementary material for: Factors affecting complete and timely childhood immunization coverage in Sindh, Pakistan; A secondary analysis of cross-sectional survey data
Source: PLoS One. 2018 Oct 31;13(10):e0206766. doi: 10.1371/journal.pone.0206766 (PMC6209382; doi:10.1371/journal.pone.0206766)
Supplement: S1 Dataset — (XLSX) [file pone.0206766.s001.xlsx]

## Sheet: #LN00047
Mother id	Children’s age	Children’s age group 1=12-23 months, 2=9-11 months, 3=14 weeks-8months, 4=10-13 weeks, 5=6-9 weeks, 6=0-5 weeks	Mother's age	Mother's age group 1=35-, 2=25-34, 3=15-24	Number of living children	Number of living children group 1=5+, 2=4 children, 3=3 children, 4=2 children, 5=1 children	Residence 4=Rural, 2=Town/small city, 1=Large city	Mother's education 1=Secondary or higher, 2=Primary or middle, 3=No education	Father's education 1=Secondary or higher, 2=Primary or middle, 3=No education	Wealth quintile 5= Fifth(richest), 6= Fourth, 7= Third, 8= Second, 9= First(poorest)	Health professional 1=Yes, 2=No	Low-level health workers 1=Yes, 2=No	Relatives/friends 1=Yes, 2=No	Media 1=Yes, 2=No	Number of antenatal care visits 0= 4+, 1= 3, 2= 1-2	Assistance during delivery 1= No one/others, 2= Traditional birth attendant, 3= Health professional	Place of delivery 1= Public facility, 2= Private facility, 3= Home	BCG 1= Yes, 2= No	Polio 0 1= Yes, 2= No	Polio 1 1= Yes, 2= No	Polio 2 1= Yes, 2= No	Polio 3 1= Yes, 2= No	Penta 1 1= Yes, 2= No	Penta 2 1= Yes, 2= No	Penta 3 1= Yes, 2= No	Measles 1 1= Yes, 2= No	Measles 2 1= Yes, 2= No	Full basic immunization 1= Yes, 2= No
serial	babyage	category	Age	agegp	Nchildren	NchildrenGp	Residence	educationgp	hus_educationgp	wealth	Healthprofessional	lowlevelHW	relative	infoMedia	antegp	assist	place	BCG	POLIO_0	POLIO_1	POLIO_2	POLIO_3	penta1	penta2	penta3	MEASLES1	MEASLES2	basic
103348	207	3	32	2	3	3	1	1	1	5	2	2	2	2	0	2	2	1	2	2	2	2	1	1	1	1	2	2
103367	33	6	24	3	3	3	2	1	1	6	2	2	1	2	0	3	3	1	2	2	2	2	2	2	2	2	2	2
103375	637	1	35	1	6	1	2	2	1	7	1	2	1	2	1	2	2	1	2	1	2	2	2	2	2	1	2	2
107734	450	1	25	2	2	4	4	3	3	9	2	2	2	2	0	3	3	1	1	1	2	2	2	2	2	2	2	2
107786	625	1	32	2	6	1	4	1	1	9	2	2	2	2	2	3	3	1	1	1	1	2	2	2	2	2	2	2
107790	28	6	21	3	3	3	4	2	1	8	1	2	2	2	1	2	2	1	1	2	2	2	2	2	2	2	2	1
107794	252	3	28	2	5	1	4	3	1	9	2	2	2	2	1	2	3	1	2	2	2	2	1	1	1	2	2	2
107797	364	2	25	2	5	1	4	3	3	9	2	2	2	2	2	3	3	1	2	2	2	2	1	1	1	1	2	2
107839	377	1	30	2	2	4	4	3	3	9	2	1	2	2	1	3	3	1	2	2	2	2	2	2	2	2	2	2
107840	411	1	30	2	4	2	4	3	2	9	2	1	2	2	1	3	3	1	1	2	2	2	2	2	2	2	2	2
107841	411	1	25	2	2	4	4	3	3	9	2	2	2	2	2	3	3	2	2	2	2	2	2	2	2	2	2	2
107865	228	3	30	2	5	1	4	3	2	9	2	2	2	2	1	3	3	2	2	2	2	2	2	2	2	2	2	2
109016	226	3	20	3	1	5	4	2	2	9	2	2	2	2	2	3	3	1	1	1	2	2	2	2	2	2	2	2
109024	465	1	25	2	2	4	4	3	3	9	2	1	2	2	1	3	3	1	2	1	1	1	1	2	2	1	2	2
101423	630	1	22	3	1	5	1	2	2	5	2	2	2	2	0	2	2	2	2	2	2	2	2	2	2	2	2	2
101428	53	5	30	2	1	5	1	1	1	5	1	2	1	2	0	2	2	1	2	2	2	2	2	2	2	2	2	2
101434	46	5	28	2	4	2	1	1	1	5	2	2	1	2	0	2	2	1	2	1	2	1	1	2	2	2	2	2
101445	132	3	26	2	5	1	1	2	3	5	2	2	1	2	0	2	2	1	1	1	2	2	1	2	2	2	2	2
101446	448	1	22	3	1	5	1	1	2	5	2	2	1	2	0	3	3	1	1	1	1	2	1	1	2	2	2	2
101447	252	3	26	2	2	4	1	1	2	5	2	2	1	2	0	2	2	1	1	1	1	1	1	1	1	2	2	1
101448	632	1	29	2	1	5	1	2	1	5	2	2	2	2	0	3	3	1	1	1	1	1	1	1	1	1	2	2
101449	203	3	26	2	1	5	1	1	1	5	2	2	1	2	0	2	2	1	1	2	2	2	2	2	2	2	2	2
101450	118	3	19	3	2	4	1	3	3	5	2	2	2	2	1	2	3	1	1	2	2	2	2	2	2	2	2	2
101451	98	3	21	3	1	5	1	1	3	5	1	2	1	2	2	2	2	1	1	1	1	1	1	1	1	2	2	1
101452	237	3	24	3	2	4	1	2	1	5	2	2	1	2	0	2	2	1	1	1	2	2	1	2	2	2	2	2
101453	171	3	24	3	2	4	1	3	2	5	1	2	1	2	0	3	3	1	1	1	2	2	1	2	2	2	2	2
101454	167	3	29	2	6	1	1	1	2	5	1	2	1	1	0	2	2	1	1	1	2	2	1	2	2	2	2	2
101456	146	3	27	2	1	5	1	1	1	5	1	2	1	2	0	2	2	1	2	1	1	1	1	1	1	2	2	2
101457	246	3	36	1	5	1	1	3	1	6	2	2	2	2	0	2	1	1	2	1	1	1	1	1	1	2	2	2
101458	314	2	24	3	1	5	1	1	1	5	1	2	1	2	0	2	1	1	2	1	1	1	1	1	1	1	2	2
101459	306	2	25	2	1	5	1	1	1	6	2	1	2	2	0	2	2	1	2	2	2	2	1	1	2	1	2	2
101461	339	2	34	2	3	3	1	1	1	5	2	1	2	1	0	2	2	1	2	1	1	1	1	1	1	1	2	2
101465	281	2	38	1	9	1	1	2	1	6	2	2	2	2	0	3	3	1	1	1	1	2	1	1	2	2	2	2
101467	713	1	26	2	1	5	1	2	1	5	2	2	2	2	2	2	1	1	1	1	2	2	1	2	2	2	2	2
101469	474	1	33	2	7	1	1	2	3	6	2	2	1	1	0	2	1	2	2	2	2	2	2	2	2	2	2	2
101471	102	3	27	2	4	2	1	3	1	6	2	2	2	2	0	3	3	1	1	1	2	2	1	1	1	2	2	2
101472	384	1	24	3	2	4	1	1	2	7	1	2	2	2	2	2	2	1	1	1	1	1	1	1	1	2	2	2
101474	518	1	26	2	1	5	1	1	2	5	1	1	2	2	0	2	2	1	1	1	1	1	1	1	1	1	1	1
101475	242	3	24	3	1	5	1	2	2	5	1	2	1	2	0	2	2	1	1	1	1	1	1	1	1	2	2	1
101476	225	3	34	2	4	2	1	1	3	6	1	2	1	2	0	2	1	1	1	1	1	1	1	1	1	2	2	1
101478	179	3	24	3	1	5	1	2	2	5	2	2	1	2	0	2	1	1	1	1	2	2	1	2	2	2	2	2
101479	215	3	30	2	5	1	1	2	2	5	2	2	2	2	0	2	1	1	1	2	2	2	2	2	2	2	2	2
101485	123	3	22	3	1	5	1	1	1	6	1	2	1	2	0	2	1	1	1	2	1	2	2	2	2	2	2	2
101486	143	3	22	3	1	5	1	2	3	6	1	2	1	2	0	2	1	1	1	2	2	2	2	2	2	2	2	2
101487	277	2	19	3	1	5	1	1	1	5	1	2	2	2	0	2	1	1	2	2	2	2	1	2	2	2	2	2
101490	27	6	35	1	4	2	1	1	1	6	1	2	1	2	0	2	1	1	1	2	2	2	2	2	2	2	2	1
101491	290	2	31	2	3	3	1	1	1	5	2	2	1	1	0	2	2	1	2	1	1	1	1	1	1	1	2	2
101492	634	1	35	1	1	5	1	1	1	5	1	2	1	2	0	2	2	1	2	1	1	1	1	1	1	1	1	2
101495	411	1	25	2	3	3	1	1	1	5	2	2	2	2	0	2	2	1	2	1	1	1	1	1	1	1	2	2
101498	316	2	26	2	1	5	1	1	1	5	2	2	2	1	0	2	2	1	1	2	2	2	1	2	2	2	2	2
101501	370	1	30	2	2	4	1	1	1	5	2	2	2	2	0	2	1	2	1	2	2	1	1	1	1	2	2	2
101502	140	3	27	2	3	3	1	2	1	5	2	2	2	2	0	2	2	1	2	2	2	2	1	1	2	2	2	2
101503	368	1	30	2	2	4	1	1	1	5	2	2	2	2	0	2	2	1	1	1	1	1	1	1	1	2	2	2
101510	54	5	25	2	2	4	1	2	1	6	1	2	1	2	0	2	1	1	1	2	2	2	2	2	2	2	2	2
101512	371	1	24	3	1	5	1	2	1	5	1	2	1	2	0	2	1	1	1	1	1	1	1	1	1	1	1	1
101516	371	1	20	3	1	5	1	2	1	5	2	2	2	2	0	2	1	1	1	1	1	1	1	1	2	1	2	2
101518	53	5	27	2	1	5	1	1	1	5	2	2	2	2	0	2	2	1	1	2	2	2	2	2	2	2	2	2
101520	187	3	23	3	2	4	1	1	3	5	2	2	2	2	0	2	1	1	1	1	1	2	1	1	2	2	2	2
101523	167	3	22	3	1	5	1	1	2	5	1	2	2	1	0	2	2	1	1	1	1	2	1	1	2	2	2	2
101525	418	1	24	3	2	4	1	1	1	6	1	2	1	2	0	2	2	1	1	1	1	1	1	1	1	1	2	2
101527	53	5	29	2	5	1	1	1	1	5	2	2	1	2	0	2	2	1	1	1	2	2	1	2	2	2	2	1
101528	405	1	24	3	2	4	1	1	1	6	2	2	1	1	0	2	2	1	2	1	1	1	1	1	1	1	2	2
101534	687	1	26	2	1	5	1	1	1	5	1	2	1	1	0	2	2	2	1	1	1	1	1	1	2	2	2	2
101535	335	2	26	2	1	5	1	1	1	6	2	2	2	1	0	2	2	1	1	1	1	1	1	2	2	1	2	2
101538	300	2	27	2	3	3	1	1	1	6	2	2	2	2	0	1	2	1	1	1	1	1	1	2	2	1	2	2
101540	118	3	22	3	2	4	1	1	1	5	2	2	2	2	0	2	2	1	1	1	1	2	1	1	2	2	2	2
101549	14	6	26	2	5	1	1	3	3	7	2	2	1	2	0	3	3	1	2	2	2	2	2	2	2	2	2	2
101558	62	5	20	3	2	4	1	2	2	6	2	2	2	2	2	2	1	1	1	2	2	2	2	2	2	2	2	2
101561	26	6	28	2	2	4	1	3	2	5	2	2	1	2	1	2	2	1	2	2	2	2	2	2	2	2	2	2
101567	412	1	29	2	1	5	1	1	1	5	1	2	1	1	0	2	2	1	1	1	1	1	1	1	1	1	1	1
101575	463	1	24	3	3	3	1	1	1	5	2	2	2	2	0	2	2	1	1	1	1	1	1	1	1	1	1	1
101579	588	1	29	2	3	3	1	1	1	5	2	2	2	2	0	2	2	1	1	1	1	1	1	1	1	1	1	1
101581	161	3	39	1	5	1	1	1	1	5	2	2	2	2	0	2	2	1	1	1	1	2	1	1	2	2	2	2
101582	402	1	34	2	2	4	1	1	1	5	2	2	2	2	0	2	2	1	1	1	1	1	1	1	1	1	2	2
101586	24	6	30	2	4	2	1	2	1	5	2	2	1	2	0	2	2	1	1	2	2	2	2	2	2	2	2	1
101587	531	1	34	2	1	5	1	1	1	5	2	2	1	2	0	2	1	1	1	1	1	1	1	1	1	1	2	2
101588	538	1	24	3	6	1	1	3	3	5	2	2	1	2	0	3	3	1	1	2	2	2	2	2	2	1	2	2
101589	268	3	25	2	2	4	1	1	1	5	2	2	2	2	0	2	2	1	1	2	2	2	2	2	2	2	2	2
101590	395	1	31	2	3	3	1	2	2	6	1	2	1	2	0	2	1	1	2	1	1	2	1	2	2	2	2	2
101592	278	2	27	2	3	3	1	1	1	6	1	2	1	2	0	2	2	1	1	1	1	1	1	1	1	2	2	2
101593	594	1	32	2	4	2	1	1	2	6	1	2	2	1	0	2	1	1	1	1	1	1	1	1	1	1	2	2
101604	277	2	30	2	2	4	1	1	1	5	2	2	2	2	0	2	2	1	1	1	1	1	1	1	1	2	2	2
101608	256	3	25	2	1	5	1	1	1	5	2	2	2	2	0	2	2	1	1	1	1	2	2	2	2	2	2	2
101609	260	3	28	2	1	5	1	1	1	5	2	2	2	2	0	2	2	1	1	2	2	2	2	2	2	2	2	2
101617	466	1	30	2	3	3	1	2	3	6	1	2	1	1	1	2	2	1	1	1	2	2	2	2	2	2	2	2
101621	185	3	30	2	3	3	1	2	2	5	1	2	1	2	0	2	2	1	1	1	1	1	2	2	2	2	2	2
101622	48	5	35	1	2	4	1	3	3	6	2	2	2	2	2	2	2	1	1	1	1	1	1	1	1	1	1	1
101623	300	2	35	1	7	1	1	3	3	5	2	2	2	2	0	2	2	1	1	1	1	1	1	2	2	2	2	2
101628	93	4	18	3	1	5	1	1	1	5	2	2	2	2	0	2	1	2	1	1	1	2	1	1	2	2	2	2
101629	287	2	18	3	1	5	1	1	3	5	2	2	2	2	0	2	2	1	1	1	1	1	1	1	1	2	2	2
101632	168	3	20	3	2	4	1	1	1	5	2	2	2	2	0	2	1	1	1	1	1	1	1	1	1	2	2	1
101643	171	3	29	2	4	2	1	3	1	6	2	2	2	2	0	3	3	1	1	1	1	1	1	2	2	2	2	2
101645	533	1	21	3	2	4	1	3	2	6	2	2	2	2	0	2	2	1	1	2	2	2	1	1	1	1	2	2
101646	145	3	29	2	3	3	1	1	2	5	2	2	2	2	0	2	2	1	1	2	2	2	1	2	2	2	2	2
101647	445	1	25	2	3	3	1	1	3	5	2	2	2	2	0	2	1	1	2	2	2	2	1	1	1	2	2	2
101651	194	3	25	2	2	4	1	2	3	5	2	2	2	2	0	3	3	2	2	2	2	2	1	2	2	2	2	2
101652	254	3	27	2	4	2	1	1	1	6	2	2	2	2	0	2	2	1	1	2	2	2	1	1	1	2	2	2
101653	413	1	24	3	4	2	1	3	2	5	2	2	2	2	0	2	2	1	1	1	1	1	1	1	1	1	2	2
101658	152	3	37	1	6	1	1	2	3	5	2	2	1	2	2	2	3	1	2	2	2	2	2	2	2	2	2	2
101660	420	1	27	2	2	4	1	3	3	7	1	2	2	2	0	2	1	1	1	2	2	2	1	2	2	2	2	2
101663	334	2	24	3	3	3	1	3	3	6	1	2	1	2	0	2	2	2	2	1	1	2	2	2	2	2	2	2
101665	442	1	19	3	1	5	1	3	3	7	1	2	1	2	0	2	2	1	2	1	2	2	2	2	2	2	2	2
101671	35	6	25	2	1	5	1	1	3	5	2	2	1	2	0	2	1	1	1	2	2	2	2	2	2	2	2	1
101673	281	2	24	3	1	5	1	1	1	5	1	2	1	2	0	2	2	1	1	1	2	2	2	2	2	2	2	2
101674	228	3	25	2	1	5	1	1	1	5	1	2	1	2	0	2	2	1	1	2	2	2	2	2	2	2	2	2
101680	191	3	16	3	1	5	1	2	3	6	1	2	1	1	0	2	2	1	2	1	2	2	2	2	2	2	2	2
101689	52	5	26	2	2	4	1	1	3	5	2	2	2	1	0	2	2	1	2	1	2	2	2	2	2	2	2	2
101691	585	1	31	2	1	5	1	1	1	5	1	2	1	2	0	2	2	1	2	1	1	1	1	1	1	1	2	2
101698	78	4	23	3	1	5	1	1	2	5	1	2	1	2	0	2	3	1	2	2	2	2	2	2	2	2	2	2
101699	567	1	27	2	2	4	1	1	1	5	1	2	1	2	0	2	3	2	2	2	2	2	2	2	2	2	2	2
101704	297	2	25	2	1	5	1	1	2	5	1	2	1	2	0	2	2	2	1	1	1	2	2	2	2	2	2	2
101706	410	1	34	2	5	1	1	1	1	5	1	2	1	1	0	2	2	1	2	2	2	2	1	1	1	2	2	2
101722	697	1	26	2	3	3	1	2	1	6	2	2	2	2	0	3	3	1	1	2	2	2	2	2	2	2	2	2
101723	113	3	26	2	3	3	1	2	1	6	2	2	1	1	0	2	2	1	1	2	2	2	2	2	2	2	2	2
101724	331	2	23	3	2	4	1	1	1	7	2	1	2	2	0	3	3	1	1	1	1	1	1	1	1	1	2	1
101730	435	1	24	3	2	4	1	2	3	5	2	2	1	2	0	2	1	1	1	2	2	1	1	1	1	1	1	2
101733	322	2	32	2	4	2	1	1	1	5	1	2	2	1	0	2	2	1	1	1	1	1	1	1	1	1	2	1
101742	155	3	32	2	5	1	1	1	1	5	1	2	1	2	0	2	2	1	2	1	1	2	1	1	2	2	2	2
101743	596	1	30	2	2	4	1	1	1	5	2	2	1	1	0	2	1	1	1	1	2	2	1	2	2	2	2	2
101744	39	6	23	3	2	4	1	3	1	6	2	2	1	1	1	1	3	1	2	1	2	2	2	2	2	2	2	2
101764	159	3	22	3	1	5	1	1	1	5	2	2	1	2	0	2	2	1	2	2	2	2	1	1	1	1	2	2
101775	48	5	24	3	2	4	1	2	1	5	1	2	1	2	0	2	2	1	2	2	2	2	1	1	2	2	2	2
101783	482	1	35	1	10	1	1	3	3	7	1	2	2	2	2	3	3	1	2	2	2	2	1	1	2	1	1	2
101785	349	2	26	2	2	4	1	3	3	6	1	2	2	2	2	3	3	1	2	2	2	2	2	2	2	2	2	2
101787	153	3	17	3	1	5	1	3	2	7	2	2	1	2	0	2	3	1	2	2	2	2	2	2	2	2	2	2
101797	141	3	33	2	7	1	1	3	3	7	2	1	2	2	0	2	3	1	2	1	2	2	2	2	2	2	2	2
101805	185	3	34	2	4	2	1	1	2	6	1	2	2	2	0	2	2	1	1	1	1	1	1	1	1	2	2	1
101808	363	2	24	3	1	5	1	2	1	7	2	2	2	2	0	2	1	1	2	1	2	2	1	2	2	2	2	2
101809	90	4	25	2	2	4	1	1	1	5	2	2	2	2	0	2	2	1	1	1	2	2	1	2	2	2	2	2
101810	120	3	29	2	3	3	1	1	1	5	2	2	2	2	0	2	2	1	1	2	2	2	2	2	2	2	2	2
101811	186	3	17	3	1	5	1	3	2	6	2	2	1	2	0	2	3	1	1	1	1	1	1	1	2	2	2	2
101812	766	1	24	3	2	4	1	2	3	7	2	2	2	2	0	2	3	1	1	1	1	2	1	1	2	1	2	2
101813	35	6	21	3	1	5	1	3	3	6	2	2	1	2	0	2	3	1	1	1	2	2	1	2	2	2	2	1
101814	82	4	29	2	5	1	1	3	3	7	2	2	2	2	1	3	3	1	1	1	2	2	1	2	2	2	2	2
101815	643	1	24	3	2	4	1	1	1	5	1	2	1	2	0	2	1	1	1	1	1	1	1	1	1	1	2	2
101816	642	1	20	3	1	5	1	3	2	6	2	2	1	2	0	2	2	1	1	1	1	1	1	1	1	1	2	2
101817	584	1	29	2	4	2	1	3	3	6	2	2	1	2	0	3	3	1	1	2	2	2	2	2	2	2	2	2
101822	113	3	23	3	5	1	1	2	3	6	2	2	2	2	0	2	2	1	1	1	1	2	1	1	2	2	2	2
101829	358	2	39	1	5	1	1	1	1	5	2	2	2	2	0	2	2	1	1	1	1	1	1	1	1	1	2	1
101844	341	2	30	2	3	3	1	2	1	5	1	2	1	2	0	2	1	2	2	2	2	2	1	1	1	1	2	2
101856	114	3	25	2	2	4	1	1	1	6	1	2	1	2	2	2	2	1	2	2	2	2	2	2	2	2	2	2
101857	534	1	20	3	2	4	1	2	3	6	1	2	2	2	0	2	1	1	1	1	2	2	2	2	2	2	1	2
101861	231	3	19	3	1	5	1	1	1	5	1	2	2	2	0	2	2	1	1	1	1	1	1	1	2	2	2	2
101862	216	3	25	2	1	5	1	2	3	5	2	2	2	2	0	2	3	1	1	1	1	2	1	1	2	2	2	2
101872	387	1	25	2	1	5	1	2	2	6	2	2	2	2	0	2	1	1	1	1	1	1	1	1	1	1	2	2
101881	50	5	28	2	2	4	1	1	2	6	1	2	1	1	0	2	2	1	2	1	2	2	1	2	2	2	2	2
101882	188	3	25	2	2	4	1	3	1	6	1	2	1	1	0	3	3	1	1	1	1	1	1	1	1	2	2	1
101884	132	3	19	3	1	5	1	1	2	6	1	2	1	1	0	2	3	1	2	1	1	2	1	1	2	2	2	2
101896	643	1	23	3	1	5	1	3	3	6	1	2	1	1	0	2	2	1	1	1	1	1	1	1	1	1	1	1
101897	352	2	44	1	2	4	1	2	2	6	2	2	1	2	0	2	2	1	1	1	1	1	1	1	1	1	2	1
101901	268	3	25	2	3	3	1	1	1	6	2	2	2	2	0	2	1	1	1	1	1	1	1	1	1	1	2	1
101904	242	3	28	2	3	3	1	1	2	6	2	2	2	2	0	2	3	1	1	1	1	2	2	2	2	2	2	2
101905	599	1	23	3	1	5	1	1	1	5	2	2	2	2	0	2	2	1	1	1	1	1	1	1	1	1	2	2
101910	163	3	34	2	2	4	1	2	2	5	1	2	1	2	0	2	2	1	2	2	2	2	2	2	2	2	2	2
101911	412	1	25	2	4	2	1	3	3	7	2	2	1	1	0	3	3	1	2	2	2	2	1	2	2	2	2	2
101914	28	6	34	2	7	1	1	3	3	7	2	2	1	2	0	2	1	1	2	2	2	2	2	2	2	2	2	2
101919	26	6	24	3	3	3	1	3	1	6	1	2	2	1	0	2	2	1	2	2	2	2	2	2	2	2	2	2
101921	95	4	18	3	2	4	1	1	3	5	1	2	1	2	0	2	2	2	2	2	2	2	2	2	2	2	2	2
101926	380	1	17	3	1	5	1	2	1	7	2	2	1	2	0	2	2	1	2	2	2	2	2	2	2	2	2	2
101928	120	3	24	3	1	5	1	2	2	6	1	2	2	2	0	2	1	1	2	2	2	2	1	1	1	2	2	2
101929	512	1	24	3	1	5	1	1	1	5	2	2	1	2	0	2	2	1	2	2	2	2	2	2	2	1	1	2
101939	109	3	20	3	1	5	1	3	1	5	2	2	2	2	0	2	2	2	2	1	1	1	1	2	2	2	2	2
101942	326	2	26	2	3	3	1	3	3	7	1	2	1	2	2	3	3	1	2	2	2	2	2	2	2	2	2	2
101943	719	1	24	3	1	5	1	1	1	5	2	2	1	2	0	2	3	1	2	2	2	2	1	1	1	1	1	2
101944	166	3	27	2	4	2	1	3	3	7	2	2	1	2	0	2	2	1	2	2	2	2	1	1	1	2	2	2
101946	252	3	29	2	1	5	1	2	2	6	2	2	1	2	0	2	2	1	2	2	2	2	1	1	1	1	2	2
101947	112	3	25	2	1	5	1	1	3	6	1	2	2	2	0	2	2	2	2	2	2	2	2	2	2	2	2	2
101948	353	2	19	3	1	5	1	1	2	7	2	1	2	2	0	2	2	1	2	2	2	2	1	1	1	1	2	2
101969	315	2	29	2	2	4	1	1	1	5	1	2	1	2	0	2	1	1	1	1	1	1	1	1	1	2	2	2
101972	77	4	24	3	3	3	1	3	3	6	2	2	2	2	0	3	3	1	2	1	1	2	1	2	2	2	2	2
101973	461	1	21	3	1	5	1	2	2	7	2	2	2	2	0	2	2	1	1	1	1	1	1	1	1	1	2	2
101974	82	4	29	2	5	1	1	3	3	6	2	2	2	2	0	2	2	1	1	1	1	1	1	1	2	2	2	1
101985	138	3	22	3	1	5	1	1	1	5	2	2	1	2	0	2	1	1	1	1	1	1	1	1	1	2	2	1
101987	427	1	23	3	2	4	1	1	3	5	2	2	2	2	0	2	1	1	1	1	1	1	1	1	1	2	2	2
101990	431	1	23	3	3	3	1	1	1	5	2	2	2	2	0	2	1	1	1	1	1	2	1	1	1	1	2	2
102001	213	3	22	3	1	5	1	2	1	5	2	2	1	2	2	2	2	1	1	1	2	2	1	1	1	1	1	2
102009	304	2	25	2	1	5	1	1	1	5	2	2	2	2	0	2	2	1	2	2	2	1	1	1	2	1	2	2
102010	342	2	23	3	2	4	1	2	2	5	1	2	2	2	0	2	3	2	2	2	2	2	1	1	1	2	2	2
102016	75	4	25	2	1	5	1	1	1	5	1	2	2	2	0	2	2	1	2	2	2	2	2	2	2	2	2	2
102018	72	4	26	2	2	4	1	1	1	6	1	2	1	2	0	2	2	1	2	2	2	2	2	2	2	2	2	2
102019	279	2	26	2	3	3	1	1	1	5	2	2	1	2	0	2	2	1	2	1	1	2	2	2	2	2	2	2
102026	105	3	35	1	8	1	1	2	1	6	2	2	2	2	1	2	1	1	2	2	2	2	2	2	2	2	2	2
102027	119	3	26	2	4	2	1	3	2	6	2	2	2	1	1	2	2	1	2	1	1	2	2	2	2	2	2	2
102037	605	1	27	2	2	4	1	1	3	5	1	2	1	2	0	2	2	1	1	1	1	1	1	1	1	1	1	1
102044	62	5	24	3	3	3	1	3	2	6	1	2	1	2	0	2	1	1	1	1	2	2	1	2	2	2	2	1
102046	151	3	35	1	8	1	1	3	3	6	2	2	2	2	0	2	1	1	2	1	1	2	1	2	2	2	2	2
102047	376	1	23	3	2	4	1	2	3	6	2	2	2	2	0	2	2	1	1	1	1	2	1	2	2	1	2	2
102055	190	3	28	2	2	4	1	1	1	5	2	2	1	2	0	2	2	1	1	2	2	2	1	1	2	2	2	2
102067	142	3	22	3	1	5	1	1	2	7	2	2	2	2	0	2	1	2	2	2	2	2	2	2	2	2	2	2
102068	136	3	21	3	3	3	1	3	3	7	2	2	2	2	1	3	3	1	2	2	2	2	2	2	2	2	2	2
102078	59	5	39	1	6	1	1	3	1	6	1	2	1	2	1	1	1	1	1	1	2	2	1	2	2	2	2	1
102081	543	1	23	3	1	5	1	3	3	6	2	2	2	2	0	2	1	1	1	1	1	1	1	1	1	1	2	2
102084	10	6	29	2	5	1	1	3	2	7	2	2	2	2	0	2	2	1	1	2	2	2	2	2	2	2	2	1
102085	502	1	29	2	3	3	1	2	2	5	1	2	1	2	0	2	2	1	1	1	1	1	1	1	1	1	2	2
102108	225	3	23	3	1	5	1	3	3	6	2	2	2	2	0	2	2	1	1	2	2	2	2	2	2	2	2	2
102117	357	2	25	2	1	5	1	2	1	6	2	2	2	1	0	2	2	1	1	1	2	2	2	2	2	2	2	2
102140	630	1	24	3	1	5	1	1	1	5	2	1	2	2	0	2	1	1	1	1	1	1	1	1	1	1	1	1
102142	11	6	20	3	1	5	1	1	1	5	2	1	2	2	0	2	1	2	1	1	1	2	1	1	1	2	2	2
102145	298	2	35	1	4	2	1	2	2	5	2	2	2	1	1	2	1	1	1	1	1	1	1	1	1	2	2	2
102146	573	1	34	2	3	3	1	1	1	5	2	2	2	2	0	2	2	1	1	1	1	1	1	1	1	1	1	1
102147	331	2	36	1	7	1	1	1	1	5	2	2	2	2	1	2	2	1	1	1	1	1	1	1	1	1	1	1
102149	543	1	25	2	1	5	1	3	3	6	1	2	2	2	0	2	1	1	2	2	2	2	2	2	2	2	2	2
102152	93	4	24	3	4	2	1	2	1	6	1	2	1	2	0	2	2	1	2	1	2	2	1	2	2	2	2	2
102156	375	1	20	3	1	5	1	2	2	5	1	2	1	2	0	2	2	1	2	1	1	2	1	1	2	1	2	2
102157	50	5	24	3	1	5	1	2	3	6	1	2	1	2	0	2	1	1	2	2	2	2	1	2	2	2	2	2
102160	238	3	25	2	1	5	1	1	1	5	2	2	2	2	0	2	2	1	1	2	2	2	2	2	2	2	2	2
102169	709	1	34	2	5	1	1	2	2	5	1	2	1	2	0	2	2	1	1	1	1	1	1	1	1	1	1	1
102170	169	3	19	3	1	5	1	3	2	6	1	2	1	2	0	2	2	1	1	1	1	2	1	1	2	2	2	2
102171	640	1	23	3	2	4	1	1	1	5	1	2	1	2	0	2	2	1	1	1	1	1	1	1	1	1	1	1
102172	558	1	34	2	5	1	1	2	2	6	2	2	2	2	0	2	1	1	1	1	1	1	1	1	1	1	2	2
102175	648	1	21	3	1	5	1	2	1	5	2	2	1	1	0	2	2	1	1	2	2	2	2	2	2	2	2	2
102176	208	3	29	2	3	3	1	2	1	5	1	2	1	2	0	2	2	1	1	2	2	2	2	2	2	2	2	2
102177	499	1	24	3	1	5	1	1	2	5	1	2	1	2	0	2	2	1	1	2	2	2	2	2	2	2	2	2
102178	150	3	25	2	4	2	1	2	1	5	2	2	2	2	0	2	2	1	1	1	1	2	1	1	2	2	2	2
102181	450	1	23	3	2	4	1	3	1	5	1	2	1	2	0	3	3	1	1	2	2	2	2	2	2	2	2	2
102182	8	6	31	2	1	5	1	1	1	5	2	2	1	2	0	2	2	1	1	2	2	2	2	2	2	2	2	1
102183	15	6	19	3	1	5	1	2	2	5	2	2	1	2	0	2	2	1	1	2	2	2	2	2	2	2	2	1
102184	429	1	27	2	3	3	1	1	1	6	2	2	1	2	0	2	2	1	1	1	1	1	1	1	1	1	2	2
102188	23	6	29	2	4	2	1	1	1	6	1	2	1	1	0	3	3	1	1	2	2	2	2	2	2	2	2	1
102190	320	2	27	2	1	5	1	1	1	5	1	2	1	2	0	2	1	1	1	1	1	1	1	1	1	1	2	1
102191	217	3	21	3	1	5	1	1	3	5	1	2	1	2	0	2	2	1	1	1	1	1	1	1	1	1	1	1
102193	373	1	21	3	1	5	1	1	1	5	1	2	1	1	0	3	3	1	1	1	1	1	1	1	1	1	2	2
102198	123	3	24	3	1	5	1	2	1	5	2	2	1	2	0	2	2	1	1	1	1	1	1	1	1	2	2	1
102199	363	2	34	2	6	1	1	3	1	5	1	2	1	2	0	2	2	1	1	2	2	2	2	2	2	2	2	2
102200	363	2	20	3	1	5	1	1	1	6	2	2	1	2	0	2	2	1	1	1	1	1	1	1	1	1	2	1
102202	120	3	24	3	1	5	1	1	1	5	1	2	1	2	0	2	2	1	1	1	1	2	1	1	2	2	2	2
102207	173	3	21	3	2	4	1	1	2	6	1	2	2	1	0	2	1	1	1	1	1	1	1	1	1	1	1	1
102208	450	1	16	3	1	5	1	3	1	6	2	2	2	1	1	2	2	1	1	1	1	1	2	2	2	2	2	2
102209	271	3	30	2	4	2	1	2	1	5	1	2	2	1	0	2	2	1	1	1	2	2	2	2	2	2	2	2
102211	464	1	24	3	3	3	1	2	3	7	2	1	2	2	0	3	3	1	1	1	1	2	2	2	2	2	2	2
102212	166	3	24	3	2	4	1	3	2	7	2	2	2	2	1	1	2	1	1	1	1	1	1	1	2	2	2	2
102213	40	6	20	3	1	5	1	3	3	7	2	2	1	2	2	2	2	1	2	2	2	2	2	2	2	2	2	2
102218	303	2	27	2	4	2	1	2	2	6	2	2	2	2	0	3	3	1	1	1	1	1	1	1	1	1	2	1
102219	237	3	31	2	6	1	1	3	1	5	2	1	2	2	1	3	3	1	1	1	1	1	1	1	1	1	2	1
102221	219	3	28	2	2	4	1	2	1	5	2	2	2	2	0	2	2	1	1	1	1	1	1	1	1	2	2	1
102223	163	3	23	3	1	5	1	2	2	5	2	2	2	2	0	2	2	1	1	1	1	1	1	1	1	1	2	1
102224	194	3	26	2	1	5	1	3	2	6	2	2	2	2	0	2	2	1	2	1	1	1	1	1	1	2	2	2
102225	321	2	25	2	2	4	1	2	2	6	2	2	2	2	0	3	3	1	1	1	1	1	1	1	1	1	1	1
102227	400	1	31	2	3	3	1	2	3	6	2	2	2	2	2	3	3	1	1	2	2	2	1	1	1	1	1	2
102228	315	2	26	2	1	5	1	1	1	6	2	2	1	2	0	2	2	1	1	1	1	1	1	1	1	1	2	1
102232	587	1	22	3	1	5	2	2	2	6	2	2	2	1	1	3	3	1	1	1	1	2	1	2	2	2	2	2
102233	298	2	24	3	1	5	2	1	1	6	2	2	2	1	0	2	2	1	1	1	1	2	1	2	2	1	2	2
102234	449	1	25	2	2	4	2	3	3	7	2	1	2	2	2	3	3	1	1	1	2	2	1	2	2	2	2	2
102235	182	3	34	2	6	1	2	2	1	7	2	2	2	1	0	1	3	1	1	1	2	2	1	2	2	2	2	2
102241	586	1	48	1	2	4	2	3	2	7	2	2	2	2	1	3	3	1	1	1	1	1	1	1	1	1	2	2
102243	308	2	18	3	2	4	2	2	1	5	2	2	2	2	2	2	2	1	1	1	1	1	1	1	1	2	2	2
102245	309	2	27	2	3	3	2	1	1	6	2	2	2	2	2	3	3	1	1	1	1	1	1	1	1	1	2	1
102246	450	1	31	2	2	4	2	2	1	5	1	2	1	2	0	3	3	1	1	1	1	1	1	1	1	1	1	1
102249	373	1	31	2	1	5	2	1	1	5	2	2	2	2	0	3	3	1	1	1	1	1	1	1	1	1	2	2
102251	295	2	30	2	4	2	2	1	1	7	1	2	1	2	1	3	3	1	1	1	1	1	1	1	1	1	2	1
102252	261	3	30	2	3	3	2	3	1	7	2	2	2	2	2	3	3	1	1	1	1	1	1	1	1	2	2	1
102254	280	2	22	3	2	4	2	1	3	5	2	2	1	2	0	3	3	1	1	1	1	1	1	1	1	1	2	1
102259	297	2	27	2	5	1	2	3	2	8	1	1	2	2	1	2	3	1	1	1	1	1	1	1	1	1	2	1
102260	384	1	20	3	1	5	2	3	3	7	1	1	2	2	1	2	1	1	1	1	1	1	1	1	1	1	2	2
102281	524	1	26	2	1	5	2	2	1	6	2	2	2	2	0	2	2	1	1	1	1	1	1	1	1	2	2	2
102283	198	3	36	1	1	5	2	1	1	5	2	2	2	2	0	2	2	1	1	1	1	2	1	1	2	2	2	2
102293	199	3	25	2	5	1	2	3	2	6	2	2	2	2	0	2	2	1	1	1	2	2	1	1	2	2	2	2
102295	579	1	43	1	9	1	2	3	2	6	1	2	2	2	2	2	2	1	1	1	1	1	1	1	1	1	2	2
102296	113	3	20	3	1	5	2	2	1	7	2	2	2	2	0	2	2	1	1	1	1	1	1	1	1	2	2	1
102298	478	1	30	2	3	3	2	3	2	6	2	2	2	2	2	3	3	1	1	1	2	2	1	2	2	2	2	2
102300	346	2	24	3	1	5	2	3	3	6	1	2	2	2	0	2	1	1	1	1	1	1	1	1	1	1	2	1
102334	151	3	23	3	2	4	2	3	3	7	2	2	2	2	0	2	1	1	1	1	1	1	1	1	1	2	2	1
102335	298	2	25	2	5	1	2	3	1	8	2	1	2	1	0	2	2	1	2	2	2	2	1	2	2	2	1	2
102339	496	1	20	3	1	5	2	3	3	7	2	2	2	2	1	2	2	1	1	1	1	1	1	1	1	1	2	2
102342	87	4	35	1	1	5	2	1	1	5	2	1	2	1	0	2	2	1	2	1	2	2	1	2	1	1	1	2
102349	505	1	30	2	5	1	2	3	3	7	2	1	2	1	0	2	2	1	1	1	1	1	1	1	1	1	2	2
102374	362	2	25	2	2	4	1	2	3	6	1	2	1	2	0	2	1	1	1	1	1	1	2	2	2	1	2	2
102423	28	6	30	2	4	2	2	2	3	6	2	1	2	2	0	3	3	1	2	2	2	2	2	2	2	2	2	2
102424	590	1	28	2	2	4	2	3	2	6	2	2	2	2	0	3	3	1	1	1	1	2	2	2	2	2	2	2
102425	375	1	20	3	1	5	2	2	1	6	2	2	2	2	0	2	1	1	1	1	1	1	1	1	1	1	1	1
102430	227	3	22	3	2	4	2	1	1	5	1	2	2	2	1	2	1	1	2	2	2	2	1	1	1	2	2	2
102453	468	1	25	2	1	5	1	2	3	6	1	1	2	1	0	3	3	1	2	2	2	2	2	2	2	1	2	2
102454	234	3	30	2	1	5	1	1	2	7	2	2	1	1	0	2	2	1	1	1	1	1	2	2	2	2	2	2
102455	117	3	22	3	1	5	1	3	2	6	1	1	2	2	0	2	2	1	1	1	2	2	2	2	2	2	2	2
102459	75	4	25	2	2	4	2	1	3	5	1	2	1	1	1	2	2	1	1	1	1	2	1	1	2	2	2	1
102460	309	2	27	2	1	5	2	1	1	5	1	2	1	1	1	2	1	1	1	1	1	1	1	1	1	1	2	1
102470	400	1	26	2	6	1	4	3	1	7	2	2	2	1	0	2	1	1	1	1	1	1	1	1	1	1	1	1
102491	330	2	15	3	1	5	2	3	1	6	2	2	2	2	2	2	3	1	1	1	1	1	1	1	2	1	2	2
102494	330	2	41	1	8	1	2	3	3	8	2	1	2	2	0	3	3	1	1	1	1	1	1	1	1	1	2	1
102496	293	2	23	3	3	3	2	1	1	6	2	1	2	2	0	1	3	1	1	1	1	1	1	1	1	1	2	1
102497	255	3	38	1	7	1	1	2	1	5	1	1	2	2	0	2	2	1	2	1	2	1	2	2	2	2	2	2
102500	401	1	26	2	2	4	2	2	2	6	1	2	1	1	0	2	2	1	2	1	1	1	1	1	1	1	1	2
102502	660	1	26	2	2	4	2	1	1	5	1	1	2	2	0	2	2	1	2	1	1	1	1	1	1	1	1	2
102504	356	2	18	3	4	2	2	3	3	6	2	2	2	2	1	2	2	1	1	1	1	1	1	1	1	2	2	2
102505	171	3	26	2	1	5	2	2	1	5	2	2	2	2	0	2	2	1	2	1	1	2	1	1	1	2	2	2
102531	59	5	35	1	9	1	2	3	3	6	1	2	1	2	0	2	2	1	1	1	2	2	1	2	2	2	2	1
102533	165	3	32	2	4	2	2	2	3	6	1	2	1	1	2	2	2	1	1	1	1	1	2	2	2	2	2	2
102545	222	3	21	3	2	4	2	3	3	7	1	1	2	1	0	2	2	1	2	1	2	1	2	2	2	2	2	2
102550	359	2	30	2	5	1	2	3	2	6	2	2	1	2	0	2	2	1	1	1	1	1	1	2	2	1	2	2
102553	23	6	25	2	1	5	2	3	3	6	2	2	2	2	0	1	2	2	1	1	2	2	2	2	2	2	2	2
102583	364	2	22	3	2	4	1	2	2	6	1	2	1	2	0	2	1	1	1	1	1	1	2	2	2	2	2	2
102585	325	2	25	2	1	5	1	3	2	6	1	1	2	2	1	2	1	1	2	2	2	2	2	2	2	2	2	2
102591	86	4	23	3	3	3	2	3	1	5	1	2	1	1	2	3	3	1	1	2	2	1	2	2	2	2	2	2
102595	198	3	24	3	1	5	2	1	1	5	1	2	1	2	0	2	2	1	1	1	2	2	2	2	2	2	2	2
102600	20	6	27	2	1	5	1	2	1	5	1	1	2	2	0	2	1	1	2	2	2	2	2	2	2	2	2	2
102601	306	2	25	2	5	1	2	2	3	6	2	2	1	2	0	2	3	1	1	1	1	2	2	2	2	2	2	2
102604	216	3	20	3	1	5	2	3	1	7	2	2	1	1	0	2	1	1	2	2	2	2	1	1	2	2	2	2
102606	123	3	24	3	4	2	1	1	1	6	2	2	1	2	2	2	1	1	1	1	2	2	2	2	2	2	2	2
102608	461	1	27	2	2	4	1	1	1	5	2	2	1	2	0	2	3	1	2	2	2	2	1	1	1	1	1	2
102630	112	3	30	2	4	2	2	2	3	8	2	2	2	1	2	2	2	1	2	2	2	2	1	2	2	2	2	2
102636	394	1	25	2	3	3	2	1	2	6	1	2	1	1	0	2	1	2	2	2	2	2	1	1	2	2	2	2
102640	31	6	19	3	2	4	2	2	3	8	2	2	1	2	1	2	1	1	1	1	2	2	2	2	2	2	2	1
102643	170	3	18	3	1	5	2	3	3	6	2	2	1	2	2	3	3	1	1	1	1	1	1	1	2	1	2	2
102645	170	3	36	1	1	5	1	3	1	7	1	2	1	2	0	3	3	1	2	2	2	2	2	2	2	2	2	2
102646	30	6	26	2	3	3	1	1	1	5	1	2	1	1	1	3	3	1	2	2	2	2	2	2	2	2	2	2
102650	522	1	28	2	3	3	1	3	2	6	2	2	1	2	0	2	2	1	1	2	2	2	1	2	2	2	2	2
102671	293	2	24	3	4	2	1	3	2	8	2	2	1	2	0	3	3	1	1	1	1	1	1	1	1	1	2	1
102676	31	6	27	2	2	4	1	1	1	5	2	2	2	2	0	2	2	1	1	2	2	2	2	2	2	2	2	1
102679	356	2	30	2	5	1	1	1	3	6	2	2	1	2	2	3	3	1	1	1	1	1	1	1	1	1	2	1
102680	674	1	29	2	2	4	1	2	3	6	2	2	2	2	0	2	1	1	1	2	2	2	2	2	2	2	2	2
102684	455	1	36	1	6	1	1	3	2	7	2	2	2	2	1	3	3	1	1	1	1	2	1	1	2	2	2	2
102685	307	2	30	2	5	1	1	2	1	5	2	2	2	2	0	2	2	1	1	1	1	2	1	1	2	2	2	2
102695	95	4	17	3	5	1	1	1	1	6	2	2	2	2	0	2	2	2	2	2	2	2	2	2	2	2	2	2
102704	193	3	26	2	2	4	1	1	1	5	2	2	2	2	0	2	2	1	1	1	1	1	1	1	1	1	2	1
102710	384	1	32	2	7	1	1	3	2	7	2	2	2	2	0	3	3	1	1	1	1	1	1	1	1	1	2	2
102734	120	3	25	2	2	4	2	3	3	6	2	1	2	2	2	2	2	1	2	2	2	2	1	1	1	2	2	2
102735	276	2	30	2	2	4	1	3	2	7	2	2	2	2	2	2	1	2	2	2	2	2	1	1	2	2	2	2
102737	87	4	32	2	4	2	1	3	3	8	2	2	2	2	0	2	1	1	2	2	2	2	1	1	2	2	2	2
102741	52	5	31	2	4	2	1	2	1	5	2	2	2	2	1	2	2	1	2	2	2	2	2	1	2	2	2	2
102744	56	5	29	2	1	5	1	2	1	6	2	2	2	2	0	2	2	1	2	2	2	2	1	2	1	2	2	2
102769	13	6	19	3	1	5	2	2	1	5	2	2	2	2	0	2	2	1	2	2	2	2	2	2	2	2	2	2
102770	428	1	43	1	4	2	2	2	2	7	2	2	2	2	0	2	2	1	1	1	1	1	1	1	1	1	1	1
102771	71	4	31	2	4	2	2	2	2	6	2	2	2	2	0	3	3	1	1	2	2	2	2	2	2	2	2	2
102774	335	2	33	2	3	3	2	3	2	7	2	2	2	2	0	2	2	1	1	1	1	2	2	2	2	1	2	2
102776	574	1	34	2	3	3	2	3	2	7	1	2	1	2	0	2	2	2	1	2	2	2	2	2	2	2	2	2
102778	163	3	29	2	5	1	2	3	1	6	1	1	2	2	1	3	3	1	2	2	2	2	1	1	2	2	2	2
102802	195	3	30	2	3	3	2	3	2	6	1	2	2	2	0	3	3	1	1	1	1	1	1	1	1	2	2	1
102804	139	3	28	2	1	5	2	1	1	5	2	2	2	2	0	2	2	1	1	1	1	1	1	1	1	2	2	1
102805	276	2	21	3	3	3	2	2	2	6	2	2	2	2	1	3	3	1	1	1	1	1	1	1	1	2	2	2
102806	51	5	35	1	8	1	2	2	3	8	1	1	2	2	0	1	1	1	2	1	1	2	1	1	2	2	2	2
102807	141	3	34	2	8	1	2	3	2	7	1	2	2	2	2	3	3	1	2	1	1	1	2	2	2	2	2	2
102810	132	3	26	2	2	4	2	1	1	7	1	2	2	2	2	2	2	1	2	2	2	2	1	2	2	2	2	2
102811	64	5	28	2	3	3	2	1	1	6	2	1	2	1	0	3	3	1	2	2	2	2	1	2	2	2	2	2
102813	329	2	30	2	5	1	2	3	1	7	2	2	2	2	2	3	3	1	2	2	2	2	1	1	2	1	2	2
102815	100	3	30	2	6	1	2	3	1	6	2	2	2	2	1	2	2	1	2	1	2	2	1	2	2	2	1	2
102818	170	3	28	2	5	1	2	1	1	6	2	2	2	2	1	2	2	1	1	1	1	1	1	1	2	2	2	2
102819	198	3	19	3	1	5	2	2	1	6	2	2	2	1	0	2	2	1	1	1	1	1	1	1	1	2	2	1
102825	540	1	29	2	1	5	2	1	1	6	2	2	2	2	0	2	2	1	1	1	1	1	1	1	1	2	2	2
102826	703	1	28	2	3	3	2	3	3	6	2	2	2	2	1	2	1	1	1	1	1	2	1	1	2	2	2	2
102851	82	4	20	3	1	5	2	2	1	5	2	2	2	1	2	2	3	1	1	2	2	2	1	1	2	2	2	2
102856	336	2	24	3	1	5	2	3	3	6	1	2	1	2	0	3	3	1	1	1	1	1	1	1	1	2	2	2
102859	403	1	24	3	1	5	2	3	1	7	2	2	1	2	0	3	3	1	1	1	1	1	1	1	1	2	2	2
102865	351	2	34	2	6	1	2	3	2	6	1	2	1	1	1	2	1	1	1	1	1	1	1	1	1	2	2	2
102867	218	3	24	3	2	4	2	3	3	7	1	2	1	2	1	2	2	1	1	1	1	1	1	1	1	2	2	1
102871	209	3	30	2	4	2	2	3	2	8	1	2	1	1	0	2	2	1	1	1	1	1	1	1	1	2	2	1
102897	47	5	17	3	1	5	2	2	1	5	2	2	2	2	1	2	1	1	1	1	2	2	2	2	2	2	2	2
102904	268	3	25	2	5	1	2	3	1	6	2	2	1	2	0	2	2	1	1	1	1	1	1	1	1	2	2	1
102907	528	1	23	3	2	4	2	1	1	6	2	1	2	2	2	2	2	1	1	1	1	1	1	1	1	1	1	1
102908	96	4	27	2	3	3	2	2	1	6	2	2	2	2	2	2	2	1	1	1	2	2	1	2	2	2	2	2
102910	97	4	23	3	2	4	2	1	1	5	2	2	2	2	0	2	3	1	1	1	1	2	1	1	2	2	2	1
102912	534	1	19	3	2	4	2	3	2	6	2	2	2	2	2	3	3	1	1	1	1	1	1	1	1	2	2	2
102913	158	3	31	2	4	2	2	1	1	5	2	2	2	2	0	2	2	1	1	1	1	1	1	1	1	2	2	1
102915	371	1	27	2	4	2	2	1	1	6	2	1	2	2	0	3	3	1	1	1	1	1	1	1	1	2	2	2
102951	101	3	25	2	1	5	1	3	1	6	2	2	2	2	0	2	2	1	2	2	1	2	2	2	2	2	2	2
102953	33	6	31	2	1	5	1	2	2	5	2	2	2	2	0	2	2	1	2	2	2	2	2	2	2	2	2	2
102955	221	3	40	1	5	1	1	3	3	6	2	2	2	2	2	3	3	1	1	1	1	2	2	2	2	2	2	2
102957	246	3	25	2	3	3	1	1	3	5	2	2	2	2	1	2	1	1	1	1	1	2	2	2	2	2	2	2
102958	499	1	28	2	1	5	1	1	1	5	2	1	2	2	0	2	1	1	1	1	1	2	2	2	2	1	2	2
102985	376	1	40	1	4	2	2	1	1	5	2	2	1	2	0	2	2	1	1	1	1	1	2	2	2	1	2	2
102991	397	1	37	1	6	1	2	1	1	5	2	2	1	2	1	2	2	1	1	1	2	2	2	2	2	1	2	2
102998	453	1	25	2	2	4	2	3	2	6	1	2	1	2	0	2	2	1	1	1	1	1	1	1	1	1	2	2
103026	324	2	22	3	3	3	2	3	1	6	1	1	2	1	1	2	2	1	1	1	1	2	2	2	2	2	2	2
103032	282	2	30	2	5	1	2	2	1	7	1	2	1	1	2	2	2	1	1	1	1	2	2	2	2	2	2	2
103033	427	1	28	2	2	4	2	3	1	5	1	2	1	2	0	2	2	1	1	1	1	2	2	2	2	2	2	2
103034	182	3	30	2	6	1	2	3	1	7	1	2	1	2	0	2	2	1	1	1	2	2	2	2	2	2	2	2
103036	207	3	22	3	2	4	1	1	1	5	1	2	1	2	0	2	2	1	1	2	2	2	2	2	2	2	2	2
103039	231	3	25	2	2	4	1	3	1	5	1	2	1	1	0	2	2	1	2	2	2	2	2	2	2	2	2	2
103062	147	3	23	3	2	4	2	1	1	6	2	2	2	2	0	2	2	1	2	2	2	2	2	2	2	2	2	2
103064	238	3	28	2	1	5	2	1	1	6	2	2	2	1	1	2	2	1	1	1	1	2	2	2	2	2	2	2
103067	197	3	24	3	1	5	2	1	1	5	2	2	1	2	0	2	2	1	1	1	1	1	1	1	1	1	2	1
103078	9	6	25	2	3	3	2	2	3	6	2	1	2	2	0	3	3	1	1	2	2	2	2	2	2	2	2	1
103079	208	3	26	2	3	3	2	1	1	6	2	2	2	2	0	2	2	1	1	2	2	2	2	2	2	2	2	2
103080	316	2	23	3	3	3	2	2	2	6	2	2	2	1	0	2	2	1	1	1	1	2	1	1	2	2	2	2
103101	80	4	26	2	3	3	2	3	3	6	2	1	2	2	1	3	3	1	1	2	2	2	2	2	2	2	2	2
103111	499	1	27	2	4	2	1	2	2	7	2	2	2	2	0	3	3	1	1	2	2	2	2	2	2	2	2	2
103119	356	2	20	3	1	5	2	2	2	6	2	2	2	2	0	2	2	1	1	1	1	1	1	1	1	2	2	2
103141	24	6	24	3	2	4	2	1	1	6	2	2	2	2	0	2	2	1	1	2	2	2	2	2	2	2	2	1
103145	78	4	28	2	1	5	2	2	1	6	2	2	2	2	0	2	2	1	1	1	2	2	1	1	2	2	2	2
103149	340	2	24	3	8	1	2	2	3	7	2	2	2	2	2	3	3	1	1	2	2	2	1	1	1	1	2	2
103150	379	1	25	2	2	4	2	3	1	6	2	2	2	1	0	2	2	1	1	1	1	1	1	1	1	1	1	1
103152	155	3	24	3	1	5	2	2	1	6	2	2	2	2	0	2	2	1	1	1	1	2	1	1	1	2	2	2
103153	115	3	26	2	2	4	2	2	3	6	2	2	2	2	0	3	3	1	1	1	1	1	1	1	1	1	2	1
103154	87	4	25	2	1	5	2	2	1	6	2	2	2	2	0	2	2	1	2	2	2	2	2	2	2	2	2	2
103158	241	3	24	3	2	4	2	1	1	5	1	2	1	1	1	2	2	1	1	1	1	1	1	1	1	2	2	1
103192	219	3	21	3	1	5	1	1	1	6	2	2	1	2	2	2	1	1	1	1	1	1	2	2	2	2	2	2
103221	271	3	24	3	2	4	2	3	2	7	2	2	2	2	1	2	2	1	1	1	1	1	1	1	1	1	2	1
103222	402	1	25	2	2	4	2	3	1	7	2	2	2	2	2	2	2	1	1	1	1	1	1	1	1	2	2	2
103224	305	2	30	2	5	1	2	1	1	7	2	2	2	2	1	2	2	1	1	1	1	1	1	1	1	1	2	1
103230	70	4	28	2	4	2	2	3	3	8	2	2	1	2	1	2	1	2	1	1	1	1	1	2	2	2	2	2
103251	340	2	25	2	1	5	2	2	2	6	2	2	2	2	2	2	2	1	1	1	2	2	1	2	2	2	2	2
103252	160	3	24	3	2	4	2	1	2	5	2	2	1	2	1	2	2	1	1	2	2	2	2	2	2	2	2	2
103254	83	4	21	3	2	4	2	3	1	7	2	2	2	2	0	2	2	1	1	1	2	2	1	2	2	2	2	2
103256	14	6	24	3	2	4	2	1	1	6	2	1	2	2	0	2	2	1	1	2	2	2	2	2	2	2	2	1
103258	459	1	27	2	8	1	2	3	1	7	2	1	2	2	2	3	3	1	1	1	1	2	1	1	2	2	2	2
103262	150	3	26	2	4	2	2	1	1	5	2	2	1	2	0	2	2	1	1	2	2	2	2	2	2	2	2	2
103286	596	1	19	3	1	5	2	3	1	7	2	2	2	2	0	2	2	1	1	1	1	1	1	1	2	1	1	2
103295	42	5	22	3	1	5	2	2	3	7	2	2	2	2	1	2	2	1	1	2	2	2	2	2	2	2	2	2
103296	632	1	21	3	1	5	2	3	3	8	2	2	2	2	0	3	3	1	1	1	2	2	1	1	1	1	2	2
103297	321	2	32	2	3	3	2	3	1	8	2	2	2	2	2	3	3	1	1	2	2	2	1	1	2	2	2	2
103298	285	2	31	2	4	2	2	3	3	8	2	2	2	2	2	3	3	1	2	2	2	2	1	2	2	2	2	2
103393	188	3	33	2	4	2	2	1	1	5	1	2	2	2	0	2	2	1	1	1	1	1	1	1	1	2	2	1
103401	193	3	21	3	1	5	1	2	2	6	2	2	2	2	0	2	2	1	1	1	1	1	1	1	1	2	2	1
103402	190	3	21	3	1	5	1	3	2	5	1	2	1	1	0	1	2	1	1	1	1	1	1	1	2	2	2	2
103407	231	3	21	3	2	4	1	3	3	7	1	2	1	2	2	2	2	1	1	1	1	2	1	2	2	2	2	2
103410	298	2	23	3	1	5	1	1	1	5	2	2	1	1	0	2	2	1	1	1	1	1	1	1	1	1	2	1
103416	416	1	31	2	1	5	1	1	1	6	1	2	2	1	0	2	2	1	1	1	1	1	2	2	2	1	2	2
103421	358	2	32	2	3	3	1	3	3	7	1	2	2	2	0	2	2	1	1	1	1	1	1	1	1	1	2	1
103423	519	1	30	2	5	1	1	3	3	6	1	2	1	1	0	2	2	1	1	2	1	2	2	1	2	1	2	2
103425	191	3	19	3	1	5	1	3	3	5	2	2	2	2	0	2	2	2	2	2	2	2	2	2	2	2	2	2
103432	211	3	26	2	2	4	1	1	1	5	2	2	1	2	1	2	2	1	1	1	1	1	1	1	1	2	2	1
103440	631	1	26	2	2	4	1	2	2	5	2	2	1	2	0	2	2	1	1	1	1	1	1	1	1	1	2	2
103444	578	1	27	2	3	3	1	1	3	5	1	2	1	2	0	2	2	1	1	1	1	1	1	1	1	2	2	2
103445	253	3	25	2	2	4	1	2	1	5	2	2	1	2	1	2	2	1	1	1	1	2	1	1	2	1	2	2
103446	387	1	30	2	5	1	1	3	2	7	2	2	1	2	0	3	3	1	1	1	1	1	1	1	2	2	2	2
103448	529	1	27	2	3	3	1	2	1	6	2	2	2	2	0	2	2	1	1	1	1	1	1	1	1	2	2	2
103450	229	3	34	2	6	1	1	3	1	6	1	2	1	2	0	1	3	1	1	1	1	2	1	1	2	2	2	2
103455	273	2	27	2	2	4	1	2	1	5	1	2	2	1	2	2	2	1	1	1	1	1	1	1	1	2	2	2
103471	231	3	27	2	4	2	2	3	2	8	2	2	2	2	2	2	2	1	1	1	2	2	1	2	2	2	2	2
103474	241	3	29	2	4	2	2	3	1	6	2	2	2	2	0	2	2	1	1	1	2	1	1	2	2	2	2	2
103478	392	1	19	3	2	4	1	2	2	5	2	2	2	2	2	2	2	1	1	2	2	2	2	1	1	1	2	2
103480	97	4	22	3	1	5	1	2	1	5	2	2	2	2	1	2	2	1	1	1	2	1	1	2	2	2	2	2
103481	218	3	24	3	1	5	1	1	3	7	2	2	2	2	2	2	2	1	1	1	1	1	1	1	1	2	2	1
103483	248	3	23	3	4	2	2	3	3	7	2	1	2	2	0	3	3	1	1	1	1	2	1	1	2	2	2	2
103484	326	2	19	3	1	5	2	1	3	5	2	2	2	2	2	2	2	1	1	1	1	1	1	1	1	1	2	1
103485	303	2	24	3	2	4	2	3	1	5	2	2	2	2	0	3	3	2	1	1	1	1	2	2	2	1	2	2
103488	517	1	22	3	1	5	2	3	1	5	1	2	1	2	2	2	2	1	1	1	1	1	1	1	1	1	1	1
103516	229	3	32	2	4	2	2	2	3	6	2	1	2	2	0	2	2	1	1	1	1	2	1	1	2	2	2	2
103520	265	3	18	3	1	5	2	3	3	7	2	2	2	2	2	2	3	1	1	1	1	1	2	2	2	2	2	2
103526	108	3	25	2	3	3	2	2	1	7	2	1	2	2	0	2	2	1	1	2	1	2	1	2	2	2	2	2
103559	117	3	20	3	1	5	1	3	2	7	1	2	1	2	0	2	1	1	2	2	2	2	2	2	2	2	2	2
103562	289	2	23	3	3	3	1	2	2	7	1	2	1	1	1	2	2	1	1	1	1	1	2	2	2	1	2	2
103586	141	3	24	3	2	4	1	1	3	6	2	2	2	2	0	2	2	1	1	1	1	1	1	1	1	1	1	1
103587	42	5	19	3	1	5	2	3	2	6	2	2	2	2	2	2	1	1	1	2	2	2	2	2	2	2	2	2
103592	267	3	30	2	1	5	2	1	3	6	2	2	2	2	0	2	2	1	1	1	1	1	1	2	2	2	2	2
103593	635	1	24	3	2	4	1	1	1	6	2	2	2	2	0	2	2	1	1	1	1	1	1	1	1	1	1	1
103595	16	6	21	3	2	4	2	1	1	5	2	2	1	2	1	2	2	1	1	1	1	1	2	2	2	2	2	1
103596	304	2	24	3	2	4	1	1	1	5	1	1	2	1	0	2	3	2	2	2	2	2	2	2	2	2	2	2
103598	197	3	25	2	3	3	1	2	2	6	2	2	1	2	0	3	3	2	2	2	2	2	2	2	2	2	2	2
103621	197	3	29	2	3	3	2	2	1	6	1	1	2	1	0	2	2	1	1	1	1	1	1	1	1	2	2	1
103625	417	1	20	3	1	5	2	1	1	5	1	2	2	2	0	1	3	1	1	1	1	1	1	1	2	2	2	2
103628	106	3	20	3	1	5	2	1	1	5	1	2	2	1	0	2	2	1	1	1	1	1	1	2	2	2	2	2
103631	563	1	24	3	1	5	2	2	1	5	2	2	2	2	2	2	2	1	1	1	1	1	1	1	1	1	1	1
103632	637	1	25	2	5	1	2	2	1	5	1	2	2	2	2	1	2	1	1	1	1	2	1	1	2	2	2	2
103635	595	1	29	2	3	3	2	1	1	6	1	1	2	2	0	2	2	1	1	1	1	2	1	1	2	2	2	2
103657	220	3	34	2	5	1	2	3	1	7	2	2	2	2	0	3	3	1	1	1	1	2	1	1	2	2	2	2
103663	484	1	24	3	1	5	2	2	1	6	2	2	1	2	0	2	2	1	1	2	2	2	2	2	2	2	2	2
103667	499	1	24	3	2	4	2	1	1	5	2	2	1	1	0	2	2	1	1	1	1	2	1	1	2	2	2	2
103692	534	1	25	2	5	1	4	3	3	7	2	2	2	2	0	2	2	1	1	1	2	2	1	2	2	2	2	2
103701	532	1	33	2	1	5	1	3	2	6	1	2	1	2	0	2	2	1	2	1	1	1	1	1	1	1	2	2
103703	166	3	21	3	1	5	2	2	2	7	1	2	1	2	0	2	2	1	1	1	1	2	1	1	2	2	2	2
103705	388	1	28	2	2	4	2	3	1	7	2	2	1	2	2	2	1	1	1	2	2	2	2	2	2	2	2	2
103706	61	5	26	2	4	2	1	3	3	7	2	2	2	2	0	2	1	1	1	2	2	2	2	2	2	2	2	2
103709	600	1	25	2	7	1	1	2	1	6	1	2	2	2	2	2	2	1	1	1	1	1	1	1	1	2	2	2
103713	70	4	23	3	3	3	1	2	2	6	2	2	2	2	2	2	2	1	1	1	1	1	1	1	1	2	2	1
103719	623	1	25	2	2	4	1	2	1	6	1	2	2	2	0	2	2	1	1	1	2	2	1	2	2	2	2	2
103720	61	5	25	2	5	1	2	2	1	6	2	2	2	2	0	2	2	1	1	1	2	2	1	2	2	2	2	1
103726	272	2	29	2	4	2	2	1	1	5	2	2	2	2	0	2	2	1	1	1	2	2	1	2	2	1	2	2
103727	292	2	25	2	3	3	2	1	1	5	2	2	2	2	0	2	2	1	1	1	1	1	1	1	1	2	2	2
103731	488	1	26	2	6	1	2	3	1	5	2	1	2	1	2	3	3	1	2	1	2	2	1	1	2	2	2	2
103741	271	3	33	2	2	4	2	3	3	7	2	2	2	2	2	3	3	1	1	2	2	2	2	2	2	2	2	2
103744	198	3	23	3	2	4	2	2	2	7	2	2	2	2	1	2	3	1	1	1	1	2	1	1	2	2	2	2
103748	175	3	26	2	1	5	2	1	1	5	1	2	2	2	0	2	2	1	1	1	1	1	1	1	1	2	2	1
103753	546	1	30	2	3	3	2	2	2	5	2	1	2	2	2	3	3	1	1	2	2	2	2	2	2	2	2	2
103754	90	4	26	2	1	5	2	3	2	7	2	1	2	2	2	3	3	1	1	2	2	2	2	2	2	2	2	2
103763	211	3	33	2	1	5	1	3	1	7	2	2	2	2	0	2	2	1	2	2	2	2	1	1	2	1	2	2
103765	231	3	23	3	2	4	2	1	1	6	1	1	2	2	2	3	3	1	1	1	2	2	1	2	2	2	2	2
103793	219	3	22	3	1	5	2	3	2	6	2	1	2	2	0	2	2	1	1	1	1	1	1	1	1	2	2	1
103797	2	6	23	3	2	4	2	3	1	7	2	2	2	2	0	3	3	1	2	2	2	2	2	2	2	2	2	2
103798	135	3	29	2	5	1	2	3	2	7	2	2	2	1	0	3	3	1	2	2	2	2	1	2	2	2	1	2
103800	128	3	28	2	4	2	2	2	2	5	2	2	2	2	0	2	2	1	1	1	1	1	1	1	1	2	2	1
103803	114	3	30	2	6	1	2	3	3	8	2	2	2	2	0	3	3	1	1	1	1	2	1	2	2	2	2	2
103810	65	5	22	3	1	5	2	3	1	7	2	2	2	1	2	2	2	1	1	2	2	2	1	2	2	2	2	2
103839	135	3	24	3	2	4	1	2	1	6	2	2	1	2	1	2	2	1	1	1	1	1	1	1	1	1	2	1
103840	523	1	34	2	5	1	1	2	1	6	1	2	2	2	0	2	2	1	1	1	1	1	1	1	1	1	1	1
103875	240	3	21	3	1	5	2	2	2	6	1	2	1	2	0	2	2	1	2	2	1	1	1	1	1	1	2	2
103933	283	2	25	2	5	1	2	1	1	6	2	2	2	2	0	2	2	1	2	1	1	2	1	2	2	2	2	2
103956	311	2	24	3	1	5	2	3	2	6	2	2	2	2	0	3	3	1	1	1	2	2	1	2	2	2	2	2
103963	183	3	24	3	3	3	2	2	3	7	2	2	2	2	0	2	2	1	1	1	2	1	1	2	2	2	2	2
103991	525	1	30	2	2	4	2	3	3	7	1	1	2	2	0	3	3	1	2	1	2	2	1	2	2	2	2	2
103997	137	3	25	2	4	2	2	2	1	7	1	2	1	2	0	2	1	1	1	1	1	2	1	1	2	2	2	2
104006	187	3	22	3	3	3	2	2	3	7	2	2	2	2	0	3	3	1	1	1	1	2	1	1	2	2	2	2
104011	99	3	30	2	6	1	2	3	1	7	2	2	2	1	0	2	1	1	1	2	2	2	1	2	2	2	2	2
104075	235	3	28	2	2	4	2	1	1	6	2	2	2	2	2	3	3	1	1	1	1	1	1	1	1	2	2	1
104111	264	3	28	2	2	4	2	3	1	5	2	2	2	2	0	2	2	1	1	1	1	1	1	1	1	2	2	1
104117	366	1	30	2	3	3	2	3	3	7	2	2	2	1	2	3	3	1	2	2	2	2	1	2	2	2	2	2
104118	14	6	25	2	2	4	2	1	1	6	2	2	2	2	0	2	2	2	1	2	2	2	2	2	2	2	2	2
104119	276	2	29	2	4	2	2	1	1	5	2	2	2	2	0	3	3	1	1	2	1	2	1	2	2	2	2	2
104146	300	2	28	2	1	5	2	1	1	6	1	2	1	1	2	2	1	1	1	1	1	2	2	2	2	2	2	2
104152	538	1	23	3	2	4	2	2	2	5	2	2	1	2	0	2	2	1	2	2	2	2	2	2	2	2	1	2
104177	374	1	27	2	3	3	2	1	1	6	1	2	2	2	0	3	3	1	1	1	1	1	1	1	2	1	1	2
104178	159	3	32	2	1	5	2	1	1	6	1	1	2	2	2	2	2	1	1	2	2	2	1	1	1	2	2	2
104186	118	3	28	2	5	1	2	2	1	6	2	2	2	2	0	3	3	1	2	2	2	2	1	1	1	1	1	2
104187	69	5	25	2	3	3	2	3	2	6	2	2	2	2	1	2	3	1	2	2	2	2	1	1	2	2	2	2
104214	51	5	28	2	3	3	2	1	1	5	2	1	2	2	0	2	2	1	1	2	2	2	2	2	2	2	2	2
104217	55	5	21	3	3	3	1	2	2	6	1	2	1	1	0	2	2	1	1	1	2	2	2	2	2	2	2	2
104218	438	1	18	3	1	5	1	3	1	6	1	2	1	1	2	2	2	1	1	1	1	2	1	1	1	1	2	2
104219	124	3	35	1	4	2	1	3	3	6	1	1	2	1	0	3	3	1	1	1	1	2	1	1	1	2	2	2
104221	658	1	30	2	4	2	2	3	1	5	2	2	1	1	1	3	3	1	1	1	1	2	1	1	2	2	2	2
104222	173	3	30	2	1	5	2	1	1	5	1	2	2	1	0	2	2	1	1	1	1	1	1	1	1	2	2	1
104224	399	1	29	2	4	2	2	3	2	6	1	2	1	2	0	2	2	1	1	1	1	1	2	2	2	2	2	2
104226	696	1	28	2	3	3	2	2	1	6	1	2	1	2	1	2	2	1	1	1	1	1	1	2	2	1	2	2
104232	98	3	35	1	9	1	2	3	3	7	1	2	1	1	0	3	3	1	1	2	1	2	2	2	2	2	2	2
104233	95	4	17	3	1	5	1	1	1	5	1	2	1	1	0	2	2	1	2	1	2	1	2	2	2	2	2	2
104236	493	1	24	3	2	4	2	1	3	6	2	2	2	2	0	2	2	1	2	1	1	1	1	1	1	1	1	2
104237	511	1	25	2	3	3	2	3	3	8	2	2	2	2	1	2	2	1	1	1	1	1	1	2	2	2	2	2
104238	76	4	31	2	2	4	2	1	1	5	2	2	2	2	0	2	2	1	1	2	2	2	2	2	2	2	2	2
104263	175	3	18	3	1	5	2	3	1	6	2	2	1	2	0	3	3	1	1	1	1	1	2	2	2	2	2	2
104267	188	3	25	2	5	1	2	3	1	6	1	2	1	1	2	2	1	1	1	2	2	2	2	2	2	1	2	2
104269	532	1	25	2	1	5	2	3	3	7	2	2	1	2	0	3	3	1	1	1	1	1	2	2	2	1	2	2
104282	46	5	24	3	2	4	2	1	1	7	2	1	2	2	0	3	3	1	1	1	2	2	2	2	2	2	2	2
104314	204	3	26	2	1	5	2	2	1	7	1	2	1	1	0	2	1	1	1	1	1	1	2	2	2	2	2	2
104318	255	3	32	2	1	5	2	3	1	7	2	2	2	2	0	2	1	1	1	1	1	1	2	2	2	2	2	2
104324	32	6	28	2	6	1	2	3	2	7	2	2	2	2	2	2	1	1	2	2	2	2	2	2	2	2	2	2
104325	599	1	19	3	1	5	2	3	3	8	2	2	2	2	2	2	2	1	1	1	1	1	1	1	1	1	2	2
104347	532	1	25	2	2	4	2	1	1	6	2	2	2	2	2	3	3	1	1	1	1	1	1	1	1	1	1	1
104358	14	6	23	3	3	3	2	3	2	5	2	2	2	2	1	2	2	1	2	1	2	1	2	2	2	2	2	2
104392	717	1	25	2	1	5	2	3	2	6	2	2	2	2	0	2	2	1	1	1	1	1	1	1	1	1	1	1
104393	109	3	25	2	1	5	2	2	2	6	1	2	2	2	0	2	2	1	1	1	1	2	1	1	2	2	2	2
104395	402	1	26	2	2	4	2	1	1	6	2	1	2	2	0	3	3	1	2	2	2	2	1	1	1	2	2	2
104396	36	6	40	1	10	1	2	3	1	6	2	2	2	2	2	2	3	1	1	2	2	2	2	2	2	2	2	1
104400	428	1	33	2	6	1	2	3	3	9	2	2	2	2	2	2	2	1	1	1	1	1	1	1	1	1	1	1
104402	152	3	23	3	3	3	2	3	2	9	2	2	2	2	2	2	2	1	1	2	2	2	1	2	1	2	2	2
104404	433	1	23	3	2	4	2	3	3	8	2	2	2	2	2	2	2	1	1	1	1	1	1	1	1	2	2	2
104405	93	4	30	2	1	5	2	2	1	5	1	2	1	1	2	2	2	1	1	1	2	2	1	2	2	2	2	2
104409	23	6	25	2	2	4	2	2	2	5	1	2	1	1	0	2	2	2	2	2	2	2	2	2	2	2	2	2
104413	23	6	21	3	2	4	2	1	1	7	1	2	2	1	2	2	3	2	2	2	2	2	2	2	2	2	2	2
104414	20	6	24	3	2	4	2	2	1	6	1	2	1	1	0	2	2	2	2	2	2	2	2	2	2	2	2	2
104509	264	3	27	2	4	2	1	1	2	5	2	2	2	2	0	2	2	1	1	1	1	1	1	1	1	1	2	1
104515	364	2	24	3	3	3	1	3	3	5	1	2	1	2	0	2	1	1	1	1	1	1	1	1	1	1	2	1
106493	336	2	20	3	1	5	4	1	1	6	1	2	1	2	0	2	2	1	2	2	2	2	1	2	2	2	1	2
106495	346	2	22	3	1	5	4	1	1	5	1	2	1	2	0	2	2	1	2	2	2	2	2	2	2	1	2	2
106497	549	1	22	3	3	3	4	2	2	5	1	2	1	2	0	2	2	1	2	2	2	2	2	2	2	1	2	2
106498	380	1	22	3	1	5	4	1	1	5	1	2	1	1	0	2	2	1	2	2	2	2	2	2	2	1	2	2
106506	92	4	20	3	1	5	4	3	1	5	1	2	1	1	0	2	2	1	1	1	1	1	1	1	1	2	2	1
106507	67	5	29	2	3	3	4	3	2	7	1	2	1	2	0	2	2	1	2	2	2	2	2	2	2	2	2	2
106515	233	3	30	2	1	5	4	2	1	6	1	2	1	1	0	2	2	1	1	1	2	2	1	2	2	2	2	2
106516	67	5	23	3	3	3	4	2	1	6	1	2	1	1	0	2	2	1	2	1	2	2	1	2	2	2	2	2
106518	130	3	23	3	2	4	4	3	1	7	1	2	2	2	0	2	2	1	2	2	2	2	2	2	2	2	2	2
106532	373	1	31	2	4	2	4	3	1	7	1	1	2	2	0	2	3	1	2	1	1	2	1	1	2	2	2	2
106534	445	1	22	3	1	5	4	2	1	6	1	2	2	2	0	2	1	1	1	1	1	1	1	1	1	2	2	2
106537	228	3	19	3	1	5	2	3	3	8	1	2	2	2	1	3	3	1	1	1	1	1	1	1	1	2	2	1
106538	253	3	23	3	1	5	2	3	2	7	2	2	2	2	2	3	3	1	1	1	1	1	1	1	1	2	2	1
106540	360	2	30	2	1	5	4	3	2	7	2	2	2	2	0	3	3	1	1	1	1	1	1	1	1	2	2	2
106541	32	6	24	3	2	4	4	3	2	7	2	2	1	2	1	3	3	1	1	2	2	2	2	2	2	2	2	1
106546	114	3	25	2	1	5	4	3	3	7	2	2	2	2	1	3	3	1	1	1	1	1	1	1	1	2	2	1
106550	675	1	22	3	1	5	4	1	1	7	2	2	1	2	0	2	2	1	1	1	1	1	1	1	1	1	1	1
106553	27	6	25	2	3	3	4	3	3	8	1	2	1	2	0	2	2	1	1	2	2	2	2	2	2	2	2	1
106556	193	3	33	2	5	1	4	2	1	8	1	2	2	2	0	2	2	1	1	1	1	1	1	1	2	2	2	2
106557	663	1	31	2	2	4	4	3	3	7	2	2	2	2	1	2	2	1	1	1	1	1	1	1	1	2	2	2
106558	555	1	31	2	4	2	4	2	1	7	1	2	2	2	1	2	2	1	1	1	2	2	1	2	2	2	2	2
106562	142	3	18	3	1	5	2	3	1	6	2	2	2	2	2	3	3	1	1	1	1	2	1	1	1	2	2	2
106568	205	3	24	3	2	4	2	1	1	7	2	1	2	2	0	2	2	1	1	1	1	1	1	1	1	2	2	1
106570	129	3	29	2	8	1	2	1	1	6	2	2	2	1	2	3	3	1	2	2	2	2	2	2	2	2	2	2
106577	234	3	24	3	2	4	4	1	1	5	2	2	2	2	0	2	3	1	1	1	1	1	1	1	1	2	2	1
106578	38	6	28	2	1	5	4	1	1	5	2	2	1	2	0	2	2	1	1	2	2	2	2	2	2	2	2	1
106579	45	5	34	2	3	3	2	1	1	6	2	2	2	2	1	2	2	1	1	2	2	2	2	2	2	2	2	2
106585	211	3	34	2	2	4	4	3	3	7	2	2	1	1	2	2	2	1	1	2	2	2	2	2	2	2	2	2
106587	10	6	39	1	7	1	4	3	3	8	2	2	1	2	0	2	2	1	1	2	2	2	2	2	2	2	2	1
106588	138	3	41	1	7	1	4	3	1	8	2	2	2	2	0	2	2	1	1	1	2	2	1	2	2	2	2	2
106591	298	2	31	2	2	4	2	3	1	8	2	2	1	2	0	2	2	1	1	1	1	2	1	1	2	2	2	2
106592	166	3	32	2	6	1	2	3	1	7	2	1	2	2	0	2	1	1	1	1	1	2	1	1	2	2	2	2
106600	37	6	23	3	4	2	2	3	3	9	2	1	2	2	0	2	2	1	1	1	1	2	1	2	2	2	2	1
106601	436	1	24	3	2	4	2	3	1	9	2	1	2	1	0	2	2	1	1	2	2	2	2	2	2	2	2	2
106603	108	3	29	2	1	5	2	3	2	9	2	1	2	2	0	2	2	1	1	1	1	1	1	1	2	2	2	2
106604	506	1	21	3	1	5	2	2	2	8	2	1	2	1	1	2	2	1	1	1	1	1	1	1	1	1	1	1
106612	59	5	24	3	1	5	2	3	2	8	2	2	2	2	0	2	1	2	2	2	2	2	2	2	2	2	2	2
106613	292	2	20	3	1	5	2	3	1	8	2	2	2	2	0	2	2	1	1	1	1	1	1	1	1	2	2	2
106614	231	3	47	1	11	1	4	3	3	8	2	2	1	2	2	3	3	1	1	1	1	2	1	1	2	2	2	2
106637	148	3	20	3	1	5	4	3	1	7	2	2	2	2	0	2	2	1	1	1	2	2	1	2	2	2	2	2
106648	579	1	30	2	5	1	4	1	1	7	1	1	2	2	2	2	2	1	1	1	1	1	1	1	1	1	1	1
106649	270	3	32	2	6	1	4	3	1	6	1	2	2	2	0	3	3	1	1	2	2	2	2	2	2	2	2	2
106657	191	3	30	2	5	1	4	3	1	9	1	2	2	2	0	2	2	1	1	1	1	1	1	1	1	2	2	1
106658	101	3	25	2	1	5	4	3	1	9	2	2	2	2	2	2	2	1	1	1	2	2	1	2	2	2	2	2
106662	98	3	40	1	9	1	4	3	1	7	2	2	2	2	0	2	2	1	1	1	2	2	1	2	2	2	2	2
106686	305	2	32	2	1	5	4	2	1	7	2	2	2	2	0	2	1	1	1	1	1	1	1	1	1	1	2	1
106698	116	3	24	3	2	4	4	2	3	7	2	2	2	2	0	2	2	2	2	1	1	2	1	2	2	2	2	2
106717	158	3	19	3	1	5	4	3	3	9	2	2	2	2	2	3	3	1	2	2	2	2	1	1	2	2	2	2
106736	190	3	26	2	5	1	4	3	3	6	1	2	1	2	0	2	1	1	1	2	2	2	1	1	1	2	2	2
106821	426	1	20	3	7	1	4	3	3	9	2	2	2	2	0	3	3	1	1	1	1	1	1	1	1	2	2	2
106849	227	3	27	2	4	2	2	3	3	7	2	2	2	2	2	2	2	1	1	2	2	2	2	2	2	2	2	2
106850	184	3	31	2	2	4	2	2	1	8	2	2	2	2	2	2	2	1	1	1	1	1	1	1	1	2	2	1
106851	32	6	24	3	3	3	2	3	3	8	2	2	2	2	0	3	3	1	1	2	2	2	2	2	2	2	2	1
106852	168	3	29	2	4	2	2	3	3	7	2	2	2	2	0	2	1	1	1	1	1	2	1	1	2	2	2	2
106854	59	5	19	3	3	3	2	2	2	8	2	2	2	2	2	3	3	1	1	1	2	2	1	2	2	2	2	1
106856	628	1	21	3	4	2	2	3	3	8	1	2	1	2	2	3	3	1	1	1	2	2	1	2	2	2	2	2
106858	166	3	28	2	5	1	2	3	1	7	1	2	2	2	1	2	2	1	1	1	1	2	1	1	2	2	2	2
106861	68	5	24	3	2	4	2	3	2	9	1	2	2	2	2	2	1	1	1	1	2	2	1	2	2	2	2	1
106864	187	3	38	1	5	1	2	3	1	8	2	2	2	2	0	2	1	1	1	1	1	2	1	1	2	2	2	2
106865	126	3	29	2	7	1	2	3	1	7	2	2	2	2	2	3	3	1	1	1	1	2	1	1	2	1	2	2
106873	110	3	22	3	2	4	2	3	1	7	1	2	2	2	0	2	2	1	1	1	1	2	1	1	2	2	2	2
106874	154	3	25	2	4	2	2	2	2	7	1	2	2	1	2	2	2	1	1	1	1	1	1	1	1	2	2	1
106878	125	3	21	3	3	3	2	3	1	6	2	1	2	2	0	3	3	1	1	1	1	1	2	1	1	2	2	2
106881	21	6	23	3	2	4	2	3	1	6	2	2	2	2	0	2	2	1	1	2	2	2	2	2	2	2	2	1
106885	132	3	21	3	2	4	4	3	2	7	2	2	2	2	1	3	3	1	1	2	2	2	1	1	2	2	2	2
106890	57	5	25	2	6	1	4	2	1	7	2	2	1	2	0	2	2	1	1	1	2	2	1	2	2	2	2	1
106893	152	3	40	1	8	1	4	2	3	8	2	2	2	2	2	2	1	1	1	1	1	1	1	1	1	2	2	1
106894	165	3	28	2	1	5	4	3	3	8	2	2	1	2	1	3	3	1	1	1	1	2	1	1	2	2	2	2
106897	270	3	26	2	3	3	4	3	3	9	2	2	2	2	2	2	2	1	1	1	1	2	1	1	2	2	2	2
106900	40	6	26	2	2	4	4	1	1	7	1	2	1	2	1	2	2	1	2	2	2	2	2	2	2	2	2	2
106901	145	3	31	2	1	5	4	3	1	9	2	2	2	2	0	2	2	1	1	1	1	1	1	1	1	2	2	1
106902	641	1	30	2	2	4	4	3	1	8	2	2	2	2	2	2	2	1	1	1	1	1	1	2	2	2	2	2
106914	300	2	34	2	7	1	4	3	1	8	2	2	2	2	2	2	2	1	1	1	1	1	1	1	1	2	2	2
106921	262	3	31	2	1	5	4	3	3	9	2	1	2	2	2	3	3	2	2	2	2	2	2	2	2	2	2	2
106923	281	2	35	1	3	3	4	3	3	9	1	2	2	2	2	2	2	2	2	2	2	2	2	2	2	2	2	2
106930	302	2	22	3	1	5	4	3	2	9	2	2	2	2	2	3	3	1	1	1	1	1	1	1	2	2	2	2
106933	245	3	24	3	1	5	4	3	3	7	2	1	2	2	0	3	3	1	2	1	1	2	1	2	2	2	2	2
106951	461	1	25	2	2	4	4	3	2	8	1	2	1	2	1	2	2	2	2	2	2	2	2	2	2	2	2	2
106965	73	4	29	2	3	3	4	3	3	8	1	2	1	2	0	3	1	1	1	2	2	2	2	2	2	2	2	2
106970	446	1	26	2	2	4	4	1	1	6	2	2	2	2	0	2	2	1	1	1	1	1	1	1	2	2	2	2
106997	60	5	19	3	1	5	4	1	1	6	1	2	1	2	0	2	2	2	2	2	2	2	2	2	2	2	2	2
107006	394	1	20	3	1	5	2	1	1	6	2	2	2	2	0	2	2	1	1	1	1	2	1	2	2	2	2	2
107013	300	2	37	1	2	4	2	3	1	8	2	2	2	2	1	2	1	1	1	1	2	2	1	2	2	1	2	2
107019	281	2	29	2	6	1	4	3	2	8	2	2	2	2	0	3	3	2	2	1	2	2	1	2	2	1	2	2
107024	166	3	44	1	8	1	4	3	3	8	2	2	2	2	1	3	3	1	1	1	2	2	1	2	2	2	2	2
107029	290	2	30	2	1	5	2	2	3	9	2	2	2	2	2	2	1	1	1	1	2	1	1	2	2	2	2	2
107035	90	4	17	3	1	5	2	2	1	8	2	2	2	2	1	2	2	1	1	1	1	2	1	1	2	2	2	1
107036	163	3	27	2	2	4	2	1	1	8	2	2	1	2	1	2	2	1	1	1	1	1	1	1	1	2	2	1
107058	283	2	20	3	3	3	2	3	1	7	2	2	2	2	1	2	3	1	1	1	1	1	1	1	1	1	2	1
107077	168	3	34	2	5	1	2	2	1	8	2	2	2	2	2	2	2	1	1	1	2	2	1	2	2	2	2	2
107084	535	1	31	2	6	1	2	3	1	9	2	2	2	2	2	3	3	1	1	1	1	1	1	1	1	1	2	2
107094	5	6	30	2	2	4	4	2	2	7	2	1	2	1	2	2	2	1	2	2	2	2	2	2	2	2	2	2
107107	25	6	24	3	2	4	4	1	1	9	1	2	2	2	0	2	2	1	2	1	2	2	1	2	2	2	2	2
107121	63	5	27	2	4	2	4	1	1	7	2	2	2	2	0	2	2	1	1	2	2	2	2	2	2	2	2	2
107142	205	3	30	2	3	3	4	3	3	8	2	1	2	2	0	3	3	1	2	1	2	2	1	2	2	2	2	2
107161	163	3	23	3	2	4	4	3	3	7	1	2	2	2	1	2	1	1	2	1	2	2	1	1	2	2	2	2
107162	161	3	32	2	2	4	4	2	1	6	1	2	2	2	1	2	2	1	2	2	2	2	2	2	2	2	2	2
107163	180	3	41	1	1	5	4	2	1	8	1	2	1	2	0	2	2	1	2	1	1	2	2	2	2	2	2	2
107164	281	2	31	2	1	5	4	2	1	5	1	2	2	2	0	2	2	1	2	1	1	1	2	2	2	2	2	2
107165	319	2	18	3	2	4	4	3	1	5	1	2	2	2	0	2	2	1	2	1	1	2	1	1	2	2	2	2
107224	120	3	24	3	1	5	4	2	1	7	1	2	1	2	1	2	2	1	1	2	2	2	2	2	2	2	2	2
107225	116	3	26	2	1	5	4	3	1	9	1	2	1	2	0	2	2	1	1	1	2	2	2	2	2	2	2	2
107248	100	3	38	1	2	4	4	3	3	7	2	2	2	2	2	3	3	1	2	1	2	2	1	1	2	2	2	2
107257	85	4	38	1	5	1	4	3	3	8	1	2	1	2	0	2	3	1	1	2	2	2	2	2	2	2	2	2
107259	281	2	27	2	2	4	4	3	3	8	1	2	1	2	0	2	2	1	1	1	1	1	2	2	2	2	2	2
107311	288	2	30	2	1	5	4	3	2	7	2	2	2	2	0	2	1	1	2	2	2	2	1	2	2	2	2	2
107314	266	3	37	1	5	1	4	3	3	7	2	2	2	2	0	3	3	1	2	2	2	2	2	2	2	2	2	2
107338	76	4	30	2	3	3	2	2	1	6	2	2	2	2	0	2	2	1	1	2	2	2	2	2	2	2	2	2
107341	399	1	26	2	3	3	2	2	1	7	2	2	2	2	2	2	2	1	2	2	2	2	2	2	2	2	2	2
107342	401	1	31	2	4	2	2	2	1	7	2	2	2	2	2	2	2	1	2	2	2	2	1	2	2	2	2	2
107355	57	5	36	1	2	4	2	3	1	8	2	1	2	2	2	2	2	1	1	1	2	2	1	1	2	2	2	1
107395	465	1	23	3	1	5	2	1	1	7	2	2	2	2	0	2	1	1	1	1	2	2	1	2	2	2	2	2
107409	200	3	27	2	5	1	2	2	1	7	1	2	2	2	2	3	3	1	1	1	1	1	2	2	2	2	2	2
107438	495	1	30	2	5	1	4	2	1	6	2	1	2	2	1	2	2	1	1	1	1	2	1	1	2	2	2	2
107439	283	2	24	3	2	4	4	1	2	6	2	2	2	2	2	2	2	1	1	1	1	2	1	1	2	1	2	2
107440	295	2	32	2	7	1	4	3	1	6	2	1	2	2	0	2	1	1	1	1	1	2	1	1	2	2	2	2
107442	96	4	28	2	4	2	4	2	2	6	2	2	2	2	0	2	2	1	2	2	2	2	2	2	2	2	2	2
107446	369	1	23	3	1	5	4	3	3	9	2	2	2	2	0	2	3	1	1	2	2	2	2	2	2	2	2	2
107449	196	3	29	2	5	1	4	2	2	8	1	2	2	2	1	2	2	1	1	1	1	1	1	1	1	2	2	1
107450	325	2	32	2	1	5	4	3	3	8	2	2	2	2	0	2	2	1	1	1	2	2	1	2	2	2	2	2
107452	488	1	23	3	1	5	4	3	1	8	2	2	2	2	2	3	3	1	1	1	1	1	1	1	2	2	2	2
107462	58	5	25	2	1	5	4	3	3	6	2	2	2	2	1	2	2	1	1	1	2	2	1	2	2	2	2	1
107466	109	3	22	3	2	4	4	1	1	7	1	1	2	2	0	2	2	1	1	1	1	2	1	1	2	2	2	2
107470	58	5	25	2	1	5	4	1	1	5	2	2	2	2	0	2	2	1	1	2	2	2	1	2	2	2	2	2
107478	12	6	24	3	2	4	4	3	1	8	2	2	2	2	1	2	2	1	1	2	2	2	2	2	2	2	2	1
107480	190	3	17	3	1	5	4	3	2	8	2	2	2	2	2	1	2	1	1	1	1	2	1	1	2	2	2	2
107485	186	3	25	2	3	3	4	2	2	6	1	2	1	2	0	2	2	2	2	2	2	2	2	2	2	2	2	2
107497	12	6	31	2	1	5	4	3	3	7	1	2	1	2	0	2	2	1	2	2	2	2	2	2	2	2	2	2
107498	494	1	24	3	1	5	4	2	2	7	1	1	2	2	1	2	2	1	1	1	1	1	1	2	2	2	2	2
107506	139	3	35	1	5	1	4	2	2	6	2	2	2	2	0	3	3	1	2	2	2	2	1	1	1	2	2	2
107538	343	2	25	2	1	5	4	3	2	6	2	2	2	2	2	2	1	1	1	1	1	1	1	1	2	2	2	2
107551	576	1	25	2	1	5	4	1	1	6	1	2	1	2	0	2	2	2	2	2	2	2	2	2	2	2	2	2
107559	138	3	26	2	4	2	4	2	1	7	1	2	2	2	0	2	2	1	1	1	1	2	1	2	2	2	2	2
107564	204	3	27	2	4	2	4	2	1	6	2	1	2	2	0	2	2	1	1	1	1	1	1	1	1	2	2	1
107566	34	6	21	3	3	3	4	3	1	7	1	2	1	1	0	2	1	1	1	2	2	2	2	2	2	2	2	1
107575	49	5	21	3	1	5	4	2	3	8	2	2	2	2	0	2	2	1	1	1	2	2	2	2	2	2	2	2
107593	440	1	26	2	1	5	4	3	1	7	1	2	1	2	0	2	2	1	1	2	1	1	1	1	2	1	1	2
107594	118	3	19	3	1	5	4	3	3	7	1	2	1	2	0	2	2	1	2	1	2	2	2	2	2	2	2	2
107596	499	1	26	2	2	4	4	2	1	6	1	2	2	2	0	2	2	1	2	1	1	1	1	1	2	2	2	2
107598	265	3	24	3	2	4	4	3	1	6	2	2	2	1	0	2	1	1	2	2	2	2	2	2	2	2	2	2
107601	379	1	19	3	1	5	4	2	1	6	2	2	2	2	0	2	2	1	1	2	2	2	1	2	2	2	2	2
107602	542	1	22	3	1	5	4	3	1	7	2	2	2	2	1	2	2	1	2	1	2	2	2	2	2	2	2	2
107606	233	3	24	3	6	1	4	3	1	7	2	2	2	2	0	3	3	1	1	1	1	2	1	2	1	1	2	2
107607	328	2	25	2	1	5	4	3	2	6	2	2	2	2	0	2	2	1	1	2	2	2	2	2	2	2	2	2
107611	134	3	21	3	3	3	4	3	1	8	2	2	1	2	2	3	3	1	1	2	2	2	2	2	2	2	2	2
107624	222	3	43	1	7	1	2	3	3	8	2	1	2	2	2	3	3	1	1	1	1	2	1	1	2	2	2	2
107630	656	1	23	3	1	5	4	3	1	5	1	2	2	2	0	2	2	1	1	1	1	1	1	1	1	2	2	2
107637	139	3	21	3	1	5	4	2	1	6	2	1	2	1	0	2	2	1	1	1	1	1	1	1	1	2	2	1
107648	227	3	22	3	2	4	4	2	3	7	1	2	2	2	0	2	2	1	1	1	1	1	1	1	1	1	2	1
107657	121	3	37	1	7	1	4	3	3	8	1	1	2	2	1	2	2	1	1	2	2	1	2	2	2	2	2	2
107658	159	3	20	3	1	5	4	3	3	9	2	2	2	2	0	3	3	1	1	1	1	2	1	1	2	2	2	2
107661	302	2	41	1	4	2	4	3	1	7	2	2	2	2	2	2	2	1	1	1	1	1	1	1	1	1	2	1
107870	124	3	21	3	2	4	4	3	2	8	2	2	2	2	1	3	3	1	1	2	2	2	2	2	2	2	2	2
107883	266	3	15	3	1	5	2	3	2	8	2	2	2	2	1	2	1	2	2	2	2	1	1	2	2	2	2	2
107886	331	2	23	3	2	4	2	3	3	8	2	2	2	2	2	2	2	1	1	1	2	2	1	1	2	1	2	2
107899	195	3	24	3	5	1	4	3	1	6	2	2	1	2	0	2	2	1	1	1	1	1	1	1	1	2	2	1
107900	35	6	28	2	4	2	2	2	2	7	2	1	2	2	0	2	2	1	1	2	2	2	2	2	2	2	2	1
107906	265	3	24	3	1	5	4	2	1	6	2	2	2	2	2	2	1	1	1	1	2	2	1	2	2	2	2	2
107907	40	6	42	1	12	1	4	3	2	7	2	2	2	2	0	2	3	1	1	1	2	2	1	2	2	2	2	1
107908	77	4	19	3	1	5	4	3	1	8	2	2	2	2	1	2	2	1	1	2	2	2	2	2	2	2	2	2
107923	112	3	18	3	1	5	4	2	1	7	2	2	1	1	2	2	2	1	2	1	1	2	2	2	2	1	2	2
107935	524	1	27	2	5	1	4	3	3	7	1	2	1	2	0	3	3	1	1	1	2	1	1	1	1	2	1	2
107954	286	2	18	3	1	5	4	1	1	6	2	1	2	2	0	2	2	1	1	1	1	1	1	1	2	2	2	2
107955	606	1	39	1	2	4	4	1	1	5	2	2	2	2	0	2	2	1	1	1	1	1	1	1	1	2	2	2
107956	572	1	19	3	1	5	4	3	1	6	2	2	2	2	0	2	2	1	1	1	1	1	1	1	1	1	2	2
107958	213	3	23	3	1	5	4	3	1	7	2	2	1	2	0	3	3	1	1	1	1	1	1	1	2	2	2	2
107965	168	3	26	2	1	5	2	3	1	6	2	2	2	2	0	2	2	1	2	2	2	2	1	1	1	1	2	2
107968	361	2	25	2	1	5	4	2	2	6	2	2	1	2	0	2	2	1	2	2	2	2	1	1	1	1	1	2
107979	180	3	27	2	5	1	4	3	2	8	1	1	2	2	0	2	2	1	1	1	2	2	2	2	2	2	2	2
108003	30	6	23	3	2	4	4	3	1	6	2	2	2	2	2	2	2	1	2	2	2	2	2	2	2	2	2	2
108009	358	2	35	1	7	1	4	3	1	7	1	2	1	2	0	2	3	1	2	2	2	2	1	2	2	2	2	2
108013	249	3	18	3	1	5	4	2	2	6	1	2	1	2	1	2	2	1	2	1	1	2	2	1	2	1	2	2
108014	546	1	36	1	4	2	4	1	1	5	1	2	1	2	2	2	2	1	2	1	2	1	2	1	2	2	2	2
108032	528	1	29	2	2	4	4	2	3	7	1	2	1	2	2	2	3	1	1	2	2	2	1	1	1	1	2	2
108033	524	1	24	3	2	4	4	2	3	8	1	2	1	2	2	2	1	1	1	2	2	2	1	1	1	1	2	2
108061	505	1	22	3	2	4	4	2	1	5	2	2	1	2	0	2	2	1	1	1	1	1	1	1	1	1	2	2
108062	250	3	31	2	2	4	4	1	1	5	2	1	2	1	0	2	2	1	1	1	1	1	1	1	1	2	2	1
108065	146	3	24	3	3	3	4	1	1	5	1	2	1	1	0	2	2	1	1	1	1	1	1	1	1	2	2	1
108076	358	2	34	2	3	3	2	2	2	7	2	2	1	2	0	3	3	1	1	2	2	2	2	2	2	2	2	2
108081	114	3	27	2	2	4	2	2	1	6	2	2	2	2	0	3	3	1	1	1	1	2	1	1	2	2	2	2
108082	106	3	24	3	1	5	2	1	1	6	2	2	2	2	0	2	2	1	1	1	2	2	1	2	2	2	2	2
108085	41	6	24	3	5	1	4	3	3	8	1	2	2	2	1	2	2	1	1	2	2	2	2	2	2	2	2	1
108098	546	1	26	2	1	5	4	3	3	9	1	1	2	2	0	2	3	1	1	1	1	2	1	1	2	2	2	2
108102	351	2	27	2	3	3	4	3	3	9	2	2	2	2	0	3	3	1	1	1	1	1	1	1	1	2	2	2
108147	200	3	22	3	4	2	4	3	2	9	1	1	2	2	0	2	2	1	2	1	2	2	2	2	2	2	2	2
108184	179	3	38	1	3	3	2	3	2	9	1	2	2	2	0	2	2	1	2	1	2	2	1	2	2	2	2	2
108214	99	3	23	3	2	4	4	1	3	9	2	2	2	2	2	3	3	1	1	1	1	2	1	1	2	2	2	2
108225	462	1	35	1	10	1	2	3	3	8	2	2	2	2	0	3	3	1	1	1	2	2	1	2	2	2	2	2
108234	75	4	33	2	8	1	4	3	3	8	2	1	2	2	2	3	3	1	2	1	2	2	1	2	2	2	2	2
108269	241	3	24	3	3	3	4	3	1	9	2	2	2	2	2	2	3	1	1	1	1	1	1	1	2	2	2	2
108302	62	5	32	2	3	3	4	3	1	7	1	2	1	2	0	2	2	1	2	1	2	2	2	2	2	2	2	2
108355	77	4	24	3	3	3	4	2	2	7	2	2	1	2	2	2	2	2	2	2	2	2	2	2	2	2	2	2
108374	34	6	31	2	4	2	4	3	3	9	2	2	2	2	0	3	3	1	1	2	2	2	2	2	2	2	2	1
108404	61	5	30	2	1	5	4	2	2	9	2	2	2	2	0	3	3	2	1	2	2	2	1	2	2	2	2	2
108405	370	1	18	3	2	4	4	3	2	9	2	2	2	2	2	3	3	1	2	1	2	2	1	2	2	2	2	2
108410	143	3	25	2	4	2	4	3	1	9	2	2	2	2	2	3	3	1	2	2	2	2	2	2	1	2	2	2
108414	143	3	38	1	5	1	4	3	3	9	2	2	2	2	0	3	3	1	2	2	2	2	1	2	2	2	2	2
108416	187	3	27	2	2	4	4	3	3	9	2	2	2	2	0	3	3	1	2	1	2	2	1	2	2	2	2	2
108466	299	2	42	1	3	3	4	3	3	8	2	2	2	2	2	2	2	1	1	1	1	1	1	1	1	2	2	2
108469	276	2	20	3	1	5	2	2	3	7	2	2	2	1	0	3	3	1	1	2	2	2	1	2	2	2	2	2
108470	255	3	30	2	8	1	2	3	3	7	2	1	2	1	2	3	3	1	1	1	1	2	1	2	2	2	2	2
108471	83	4	35	1	8	1	2	3	2	8	2	2	2	2	0	2	2	1	2	1	2	2	2	2	2	2	2	2
108473	284	2	23	3	3	3	2	3	1	7	2	2	2	1	0	2	1	1	1	1	1	1	1	1	2	2	2	2
108475	265	3	25	2	5	1	2	3	3	6	2	1	2	2	0	2	2	1	1	1	1	2	1	2	2	1	2	2
108476	195	3	18	3	1	5	2	2	2	6	2	1	2	2	1	2	2	1	1	1	1	1	1	1	1	2	2	1
108483	536	1	24	3	1	5	4	3	3	7	2	1	2	2	2	2	2	1	1	1	1	2	1	1	2	2	2	2
108487	268	3	45	1	6	1	2	3	3	9	1	2	2	2	1	2	2	1	1	1	1	1	1	1	1	1	2	1
108488	91	4	30	2	6	1	2	3	2	8	1	2	1	2	0	2	2	1	1	1	1	2	1	1	2	2	2	1
108489	523	1	25	2	1	5	2	3	3	8	1	2	1	2	0	2	3	1	1	1	1	1	1	1	1	1	1	1
108490	227	3	32	2	5	1	2	2	1	6	1	2	2	2	0	2	2	1	1	1	1	2	1	1	2	2	2	2
108493	227	3	20	3	4	2	2	3	2	9	2	2	2	2	0	3	3	1	1	1	1	1	1	1	1	2	2	1
108496	44	5	25	2	2	4	2	3	3	9	2	1	2	2	1	2	2	1	1	2	2	2	2	2	2	2	2	2
108497	174	3	35	1	8	1	2	3	1	9	1	2	2	2	0	3	3	1	1	1	2	2	1	2	2	2	2	2
108501	241	3	39	1	5	1	2	3	2	9	2	2	2	2	0	3	3	1	1	1	2	2	1	1	2	1	2	2
108502	234	3	22	3	3	3	2	2	2	9	2	2	2	2	0	3	3	1	2	1	2	2	1	1	1	1	2	2
108508	194	3	29	2	3	3	2	2	1	7	2	2	2	2	1	2	1	1	1	1	2	2	1	2	2	2	2	2
108510	255	3	31	2	6	1	2	2	1	7	2	2	2	2	0	2	2	1	1	1	1	1	1	1	1	1	2	1
108512	38	6	35	1	5	1	2	3	1	5	2	2	2	2	0	2	2	1	1	2	2	2	2	2	2	2	2	1
108518	430	1	48	1	10	1	2	3	3	8	2	2	2	2	0	2	1	1	1	1	1	1	1	1	1	1	2	2
108522	189	3	29	2	5	1	2	3	1	8	2	2	2	2	0	2	2	1	1	1	1	2	1	1	2	2	2	2
108531	168	3	29	2	5	1	4	3	1	8	1	2	1	2	0	3	3	1	1	1	1	2	1	1	2	2	2	2
108532	124	3	25	2	1	5	4	2	2	8	2	2	2	2	2	3	3	1	1	1	1	1	1	1	1	2	2	1
108533	285	2	23	3	3	3	4	2	1	8	2	2	1	2	2	3	3	1	1	1	2	2	1	2	2	2	2	2
108548	410	1	32	2	3	3	4	2	1	8	2	2	2	2	2	2	2	1	1	1	1	2	2	2	2	2	2	2
108594	135	3	25	2	1	5	4	3	2	9	1	2	2	2	2	2	2	2	1	2	2	1	2	2	2	2	2	2
108598	143	3	29	2	3	3	4	3	2	9	2	2	2	2	0	2	2	1	2	1	2	2	1	2	2	2	2	2
108664	51	5	25	2	5	1	4	3	3	9	2	2	2	2	1	2	1	2	2	1	2	2	2	2	2	2	2	2
108674	11	6	18	3	2	4	4	2	1	6	2	2	2	2	2	2	1	1	2	2	2	2	2	2	2	2	2	2
108677	322	2	33	2	4	2	4	3	1	7	2	2	2	2	2	3	3	1	1	1	1	1	1	1	1	2	2	2
108680	213	3	28	2	1	5	4	1	1	6	1	2	1	1	1	2	2	2	2	2	2	2	2	2	2	2	2	2
108690	226	3	26	2	1	5	4	3	3	9	1	2	1	2	0	3	3	2	2	2	2	2	2	2	2	2	2	2
108693	494	1	30	2	3	3	4	3	3	9	2	2	2	2	0	3	3	1	1	1	1	1	1	1	1	2	2	2
108714	136	3	28	2	2	4	4	3	1	7	1	2	2	2	0	2	3	1	2	2	2	2	1	1	1	2	2	2
108716	67	5	20	3	1	5	4	1	1	6	1	2	2	2	0	2	2	1	2	2	2	2	1	2	2	2	2	2
108739	199	3	35	1	7	1	4	3	3	8	1	2	2	2	2	3	3	1	2	1	2	2	1	2	2	2	2	2
108747	174	3	22	3	1	5	4	1	1	5	1	2	1	1	0	2	2	1	2	2	2	2	1	1	1	1	2	2
108754	505	1	33	2	1	5	4	2	1	6	2	1	2	2	0	2	2	1	2	1	1	1	2	2	2	2	2	2
108889	112	3	29	2	4	2	4	3	3	8	2	2	1	2	0	3	3	1	1	2	2	2	2	2	2	2	2	2
108893	34	6	27	2	1	5	4	2	1	5	1	1	2	2	0	2	2	1	2	2	2	2	2	2	2	2	2	2
108896	204	3	27	2	4	2	4	3	3	7	1	2	2	2	0	2	1	2	2	1	1	2	1	1	2	2	2	2
108902	373	1	26	2	3	3	4	3	2	8	2	2	2	2	1	2	1	1	2	2	2	2	1	2	2	2	2	2
108937	193	3	30	2	5	1	4	3	1	8	2	2	2	2	2	2	2	2	2	1	1	1	1	1	1	1	2	2
108940	66	5	20	3	1	5	4	3	2	8	2	2	1	2	2	2	2	1	2	2	2	2	2	2	2	2	2	2
108941	108	3	25	2	1	5	4	3	3	7	2	2	2	2	1	2	3	1	2	2	2	2	2	2	2	2	2	2
108945	177	3	25	2	4	2	4	3	3	8	1	1	2	2	0	2	2	1	1	1	1	1	2	2	2	2	2	2
108948	177	3	25	2	4	2	4	3	3	8	1	1	2	2	0	2	2	1	1	1	1	2	1	2	2	2	2	2
47	77	4	35	1	5	1	1	3	1	6	2	2	2	2	0	2	2	1	1	2	2	2	2	2	2	2	2	2
68	475	1	21	3	3	3	1	3	3	6	1	2	1	1	0	2	3	1	1	1	1	1	1	1	1	1	1	1
72	213	3	22	3	2	4	1	2	3	6	2	2	1	1	0	2	2	1	1	1	1	1	1	1	1	1	1	1
173	23	6	25	2	4	2	1	2	3	6	2	2	2	2	0	2	3	1	1	2	2	2	2	2	2	2	2	1
170	134	3	25	2	2	4	1	3	3	7	1	2	1	1	0	2	1	1	1	1	1	1	1	1	1	1	1	1
171	281	2	23	3	2	4	1	2	1	6	1	2	1	2	0	2	2	1	1	1	1	1	1	1	1	1	1	1
176	42	5	33	2	5	1	1	3	3	6	1	2	1	2	2	2	1	1	1	2	2	2	2	2	2	2	2	2
83	349	2	44	1	4	2	1	2	3	5	1	2	1	1	1	2	2	1	1	1	1	1	1	1	1	1	1	1
143	227	3	32	2	3	3	1	1	2	5	1	2	1	1	2	2	2	1	1	1	1	2	1	1	2	1	1	2
275	134	3	32	2	1	5	1	1	2	5	1	2	1	1	0	2	2	1	1	1	1	2	1	1	2	1	1	2
277	542	1	28	2	4	2	1	1	1	5	1	2	1	1	1	2	2	1	1	1	1	1	1	1	1	1	1	1
73	107	3	20	3	3	3	1	3	2	7	1	2	1	2	0	3	3	1	1	1	2	2	1	2	2	1	2	2
114	254	3	25	2	1	5	1	3	2	6	1	2	1	2	1	2	2	1	1	1	1	1	1	1	1	1	1	1
117	663	1	32	2	1	5	1	2	2	5	1	2	1	1	0	2	2	1	1	1	1	1	1	1	1	1	1	1
126	283	2	29	2	1	5	1	1	1	5	1	2	2	2	0	2	2	1	1	1	1	1	1	1	1	1	1	1
146	386	1	32	2	2	4	1	1	1	5	1	2	1	1	0	2	1	1	1	1	1	1	1	1	1	1	1	1
169	611	1	25	2	1	5	1	1	1	5	1	2	1	1	0	2	2	2	2	1	1	1	1	1	1	1	1	2
40	625	1	26	2	1	5	1	3	2	5	1	2	1	2	0	2	2	1	1	1	1	1	1	1	1	1	1	1
159	182	3	30	2	2	4	1	2	1	5	1	2	1	2	0	2	1	1	1	1	1	1	1	1	1	1	1	1
165	547	1	29	2	2	4	1	2	2	5	1	2	1	2	0	2	2	1	1	1	1	1	1	1	1	1	1	1
182	142	3	27	2	1	5	1	1	2	5	1	2	1	2	0	2	2	1	1	2	2	2	2	2	2	2	2	2
945	300	2	31	2	3	3	1	1	2	6	1	2	1	1	0	2	1	1	1	1	1	1	1	1	1	1	1	1
948	642	1	27	2	1	5	1	1	3	6	1	2	1	1	0	2	2	1	1	1	1	1	1	1	1	1	1	1
808	316	2	29	2	5	1	1	3	3	7	2	1	2	2	0	3	3	1	1	1	1	1	1	1	1	1	1	1
811	321	2	30	2	5	1	1	2	3	7	1	2	1	2	0	3	3	1	1	1	1	1	1	1	1	1	1	1
941	458	1	28	2	3	3	1	1	3	5	2	2	2	2	0	2	2	1	1	1	1	1	1	1	1	1	1	1
942	515	1	23	3	1	5	1	2	1	5	2	2	2	2	0	2	2	1	1	1	1	1	1	1	1	1	1	1
980	302	2	22	3	2	4	1	2	1	5	1	2	1	2	0	2	3	1	1	1	1	1	1	1	1	1	1	1
43	345	2	24	3	1	5	1	2	1	5	1	2	1	1	0	2	2	1	1	1	1	1	1	1	1	1	1	1
52	395	1	28	2	3	3	1	2	1	5	1	2	1	1	0	2	2	1	1	1	1	2	1	1	2	1	1	2
53	393	1	24	3	1	5	1	1	1	6	1	1	2	1	0	2	2	1	1	1	1	1	1	1	1	1	1	1
55	436	1	28	2	1	5	1	1	1	5	1	2	1	1	0	2	2	1	1	1	1	1	1	1	1	1	1	1
64	144	3	23	3	2	4	1	1	1	6	1	2	2	2	0	2	1	1	1	1	1	1	1	1	1	1	1	1
67	285	2	21	3	1	5	1	2	2	6	1	2	1	1	0	2	2	1	1	1	1	1	1	1	1	1	1	1
80	373	1	25	2	1	5	1	1	1	5	1	2	1	1	0	2	2	1	1	1	1	1	1	1	1	1	1	1
1030	415	1	20	3	2	4	1	2	1	6	1	2	2	2	0	2	2	1	1	1	1	1	1	1	1	1	1	1
174	237	3	29	2	3	3	1	1	1	5	1	2	2	1	0	2	2	1	1	1	1	1	1	1	1	1	1	1
175	288	2	32	2	4	2	1	1	1	5	1	2	1	1	0	2	1	2	2	2	2	1	2	2	1	2	2	2
815	58	5	22	3	2	4	1	1	1	5	1	2	2	2	0	2	2	1	1	1	2	2	1	2	2	1	2	1
816	238	3	22	3	1	5	1	2	3	5	1	1	2	2	0	2	2	1	1	1	1	1	1	1	1	1	1	1
822	235	3	30	2	1	5	1	1	1	6	1	2	2	2	0	2	2	1	2	2	1	1	1	1	1	1	1	2
975	455	1	26	2	1	5	1	1	1	5	1	2	1	2	0	2	2	1	1	1	1	2	1	1	2	1	2	2
106	338	2	34	2	3	3	1	1	1	5	1	2	1	1	0	2	2	1	1	1	2	2	1	2	2	1	2	2
144	219	3	25	2	1	5	1	2	3	6	1	2	1	1	0	2	1	1	1	1	1	2	1	1	2	1	1	2
967	719	1	32	2	2	4	1	1	1	5	1	2	1	2	0	2	1	1	1	1	1	1	1	1	1	1	1	1
969	58	5	31	2	1	5	1	1	1	5	1	2	1	2	0	2	2	1	1	1	2	2	1	2	2	1	2	1
974	250	3	25	2	2	4	1	2	1	5	1	2	1	1	0	2	2	1	1	1	1	2	1	1	2	1	1	2
992	379	1	28	2	2	4	1	1	1	6	1	2	1	1	0	2	2	1	1	1	1	1	1	1	1	1	1	1
993	176	3	31	2	1	5	1	1	1	5	2	2	1	2	0	2	2	1	1	1	1	1	1	1	1	1	1	1
994	243	3	29	2	2	4	1	1	1	5	1	2	1	2	0	2	2	1	1	1	1	1	1	1	1	1	1	1
133	477	1	29	2	2	4	1	1	1	5	1	2	1	1	0	2	2	1	1	1	1	1	1	1	1	1	1	1
136	610	1	28	2	2	4	1	1	1	5	1	2	1	1	0	2	2	1	1	1	1	1	1	1	1	1	1	1
142	36	6	30	2	3	3	1	3	2	5	1	2	1	1	0	2	1	2	2	2	2	2	2	2	2	2	2	2
158	695	1	39	1	5	1	1	2	2	5	1	2	1	1	0	1	2	1	1	1	1	1	1	1	1	1	1	1
181	288	2	25	2	1	5	1	2	1	5	1	2	1	1	0	2	1	1	1	1	1	1	1	1	1	1	1	1
280	133	3	31	2	7	1	1	2	1	5	1	2	1	1	0	3	3	1	1	1	1	1	1	1	1	1	1	1
290	209	3	23	3	2	4	1	1	1	5	1	2	1	1	0	3	3	1	1	1	1	1	1	1	1	1	1	1
530	59	5	34	2	4	2	1	1	1	5	2	2	2	1	0	2	2	1	1	1	2	2	1	2	2	1	2	1
32	480	1	22	3	1	5	1	1	1	6	2	2	1	1	0	2	1	1	1	1	1	1	1	1	1	1	1	1
58	383	1	30	2	2	4	1	3	1	5	1	2	1	1	0	2	2	1	1	1	1	1	1	1	1	1	1	1
163	155	3	29	2	2	4	1	1	1	6	1	2	1	1	0	2	2	1	1	1	1	1	1	1	1	1	1	1
41	386	1	20	3	2	4	1	2	1	5	2	2	1	2	0	2	2	1	1	1	1	1	1	1	1	1	1	1
44	418	1	22	3	2	4	1	3	3	6	2	2	1	2	0	2	2	1	1	1	1	2	1	1	2	1	1	2
79	247	3	24	3	2	4	1	2	2	5	1	2	1	1	0	2	2	1	1	1	1	1	1	1	1	1	1	1
116	114	3	37	1	8	1	1	2	2	6	1	2	1	1	0	2	2	1	1	1	1	2	1	1	2	1	1	2
129	346	2	32	2	1	5	1	1	1	6	2	2	2	1	0	2	2	1	1	1	1	1	1	1	1	1	1	1
251	705	1	31	2	4	2	1	2	3	5	1	2	1	2	0	2	2	1	1	1	1	1	1	1	1	1	1	1
261	596	1	30	2	2	4	1	1	1	5	1	2	1	1	0	2	2	1	1	1	1	1	1	1	1	1	1	1
262	480	1	29	2	2	4	1	2	3	5	2	2	1	2	2	2	1	1	1	1	1	1	1	1	1	1	1	1
265	51	5	33	2	2	4	1	1	2	5	1	2	1	2	0	2	1	1	1	1	2	2	1	2	2	1	2	1
1006	207	3	36	1	5	1	1	1	1	5	1	2	1	2	0	2	2	1	1	1	1	1	1	1	1	1	1	1
1009	266	3	26	2	1	5	1	1	1	6	1	2	1	1	0	2	1	1	1	1	1	1	1	1	1	1	1	1
1010	73	4	21	3	2	4	1	1	1	6	1	2	1	2	0	2	2	1	1	1	2	2	1	2	2	1	2	2
364	517	1	35	1	1	5	1	1	1	5	1	2	1	2	0	2	2	1	1	1	1	1	1	1	1	1	1	1
398	359	2	27	2	2	4	1	1	1	5	1	2	1	2	0	2	2	1	1	1	1	1	1	1	1	1	1	1
415	112	3	28	2	1	5	1	1	1	5	1	2	1	2	0	2	1	1	1	1	1	2	1	1	2	1	1	2
119	413	1	35	1	8	1	1	3	3	6	1	2	1	2	0	3	3	1	1	1	1	1	1	1	1	1	1	1
283	365	1	26	2	3	3	1	1	2	6	2	2	1	1	0	2	1	1	1	1	1	1	1	1	1	1	1	1
286	183	3	35	1	2	4	1	2	1	5	2	2	2	1	0	2	2	1	1	1	1	1	1	1	1	1	1	1
132	523	1	27	2	3	3	1	2	3	6	1	1	2	1	0	2	2	1	1	1	1	1	1	1	1	1	1	1
456	228	3	40	1	5	1	1	2	2	6	1	2	1	1	0	2	2	1	1	1	2	2	1	1	2	1	1	2
459	523	1	27	2	3	3	1	3	1	5	1	2	1	2	0	2	1	1	1	1	1	1	1	1	1	1	1	1
479	643	1	25	2	2	4	1	1	1	6	2	2	1	2	0	2	2	1	1	1	1	1	1	1	1	1	1	1
1015	190	3	28	2	1	5	1	3	2	5	2	2	1	1	0	2	2	1	1	2	2	2	2	2	2	2	2	2
529	72	4	30	2	2	4	1	1	3	5	2	2	1	1	0	2	2	1	1	1	2	2	1	2	2	1	2	2
534	194	3	24	3	1	5	1	1	1	5	1	2	1	1	0	2	2	1	1	1	1	1	1	1	1	1	1	1
807	186	3	25	2	2	4	1	1	3	5	1	2	1	1	1	2	2	1	1	1	1	1	1	1	1	1	1	1
101	349	2	22	3	1	5	1	1	1	5	2	2	1	2	0	2	2	1	1	1	1	1	1	1	1	1	1	1
279	438	1	38	1	5	1	1	1	2	6	1	2	1	2	0	2	2	1	1	1	1	1	1	1	1	1	1	1
291	360	2	27	2	4	2	1	1	3	6	1	2	1	2	0	3	3	1	1	1	1	2	1	1	2	1	1	2
294	225	3	22	3	1	5	1	2	2	5	1	2	1	2	0	2	2	1	1	1	1	1	1	1	1	1	1	1
295	348	2	36	1	8	1	1	2	2	6	1	1	2	1	0	2	2	1	1	2	2	2	2	2	2	2	2	2
66	436	1	30	2	1	5	1	1	1	5	1	2	1	1	0	2	2	1	1	1	1	1	1	1	1	1	1	1
214	169	3	25	2	2	4	1	2	1	5	1	2	1	1	0	2	2	1	1	1	1	1	1	1	1	1	1	1
215	144	3	25	2	2	4	1	1	1	5	1	2	1	1	0	2	1	1	1	1	1	2	1	1	2	1	1	2
464	490	1	23	3	1	5	1	1	1	5	2	2	2	2	0	2	2	1	1	1	1	1	1	1	1	1	1	1
465	60	5	20	3	1	5	1	1	3	5	1	2	1	2	0	2	2	1	1	1	2	2	1	2	2	1	2	1
472	371	1	28	2	1	5	1	2	1	6	2	2	2	2	0	2	1	1	1	1	1	1	1	1	1	1	1	1
728	300	2	35	1	6	1	1	2	2	5	1	2	1	2	0	2	2	1	1	1	1	1	1	1	1	1	1	1
782	500	1	34	2	5	1	1	3	2	5	1	2	1	1	0	2	2	1	1	1	1	1	1	1	1	1	1	1
790	106	3	25	2	1	5	1	2	1	5	1	2	1	2	0	2	2	1	1	1	1	2	1	1	2	1	1	2
791	281	2	33	2	1	5	1	1	1	5	1	2	1	2	0	2	2	1	1	1	1	1	1	1	1	1	1	1
792	206	3	21	3	2	4	1	1	1	5	2	2	1	1	2	3	3	1	1	1	1	2	1	1	2	1	1	2
1100	439	1	19	3	1	5	1	1	1	6	1	1	2	2	0	2	1	1	1	1	1	1	1	1	1	1	1	1
100	408	1	29	2	1	5	1	1	3	6	2	2	2	2	1	3	3	1	1	1	1	1	1	1	1	1	1	1
104	318	2	29	2	3	3	1	1	3	6	2	2	2	1	0	2	2	1	1	1	1	1	1	1	1	1	1	1
109	180	3	30	2	4	2	1	3	3	7	1	2	1	2	0	3	3	1	1	1	1	1	1	1	1	1	1	1
155	85	4	33	2	10	1	1	3	3	7	2	2	2	2	1	3	3	1	1	1	1	2	1	1	2	1	1	1
130	349	2	27	2	3	3	1	1	1	5	1	2	1	1	0	2	1	1	1	1	1	1	1	1	1	1	1	1
273	111	3	28	2	2	4	1	1	1	5	1	2	2	1	0	2	2	1	1	1	1	1	1	1	1	1	1	1
274	729	1	25	2	1	5	1	1	1	5	1	2	2	1	0	2	2	1	1	1	1	1	1	1	1	1	1	1
960	231	3	29	2	2	4	1	1	1	5	1	2	1	2	0	2	2	1	1	1	1	1	1	1	1	1	1	1
962	678	1	26	2	4	2	1	1	1	5	1	2	1	2	2	2	3	1	1	1	1	1	1	1	1	1	1	1
971	303	2	23	3	1	5	1	1	3	5	2	2	2	2	0	2	2	2	2	1	1	1	1	1	1	1	1	2
972	358	2	25	2	1	5	1	2	2	6	2	2	1	2	0	2	2	1	1	1	1	1	1	1	1	1	1	1
982	650	1	26	2	1	5	1	2	3	6	1	2	1	2	0	2	3	2	2	2	1	1	2	2	2	2	2	2
937	493	1	30	2	2	4	1	1	1	5	1	2	1	1	1	3	3	1	1	1	1	1	1	1	1	1	1	1
938	163	3	30	2	5	1	1	1	2	5	1	2	1	1	0	2	2	1	1	1	1	1	1	1	1	1	1	1
939	486	1	26	2	2	4	1	1	1	5	1	2	1	1	0	2	2	1	1	1	1	2	1	1	2	1	1	2
940	225	3	21	3	1	5	1	2	3	7	1	2	1	1	0	2	2	1	1	1	1	1	1	1	1	1	1	1
804	171	3	22	3	2	4	1	1	1	5	1	2	1	2	0	2	1	1	1	1	1	1	1	1	1	1	1	1
805	80	4	30	2	3	3	1	1	1	5	1	1	2	2	0	2	1	1	1	1	2	2	1	2	2	1	2	2
819	453	1	25	2	3	3	1	1	1	5	1	2	1	2	0	2	1	1	1	1	1	1	1	1	1	1	1	1
820	388	1	35	1	3	3	1	1	1	5	1	1	2	2	0	2	1	1	1	1	1	1	1	1	1	1	1	1
963	195	3	27	2	2	4	1	1	1	5	1	2	2	2	0	2	2	1	1	1	1	2	2	2	2	2	2	2
987	472	1	25	2	1	5	1	1	1	5	1	2	1	2	0	2	2	1	1	1	1	1	1	1	1	1	1	1
1017	266	3	25	2	2	4	1	1	1	5	1	1	2	1	0	2	2	1	1	1	1	1	1	1	1	1	1	1
1019	246	3	29	2	3	3	1	1	1	5	1	2	2	2	0	2	2	1	1	1	1	1	1	1	1	1	1	1
957	313	2	36	1	3	3	1	1	1	5	1	2	1	1	0	2	2	1	1	1	1	1	1	1	1	1	1	1
1112	302	2	30	2	1	5	1	1	3	6	1	2	1	1	0	2	1	1	1	1	1	1	1	1	1	1	1	1
1114	393	1	30	2	3	3	1	1	3	5	2	2	1	1	1	2	3	1	1	1	1	2	1	1	2	1	1	2
1116	485	1	33	2	3	3	1	2	2	5	2	2	1	1	0	2	1	1	1	1	1	2	1	1	2	1	1	2
1117	380	1	22	3	1	5	1	1	2	5	1	2	1	1	0	2	1	1	1	1	1	1	1	1	1	1	1	1
92	388	1	25	2	1	5	1	2	2	5	1	2	1	2	0	2	2	1	1	1	1	1	1	1	1	1	1	1
225	241	3	32	2	6	1	1	2	1	6	1	2	1	2	1	2	2	1	1	1	1	1	1	1	1	1	1	1
227	264	3	35	1	5	1	1	2	3	5	1	2	1	2	0	2	2	1	1	1	1	1	1	1	1	1	1	1
240	220	3	20	3	1	5	1	2	3	6	1	2	1	1	0	2	2	1	1	1	2	2	2	1	2	2	1	2
756	187	3	23	3	1	5	1	2	3	6	1	2	1	1	0	2	2	1	1	1	1	1	1	1	1	1	1	1
757	106	3	27	2	2	4	1	1	3	5	1	2	1	1	0	2	2	1	1	1	1	2	1	1	2	1	1	2
766	242	3	30	2	3	3	1	2	3	5	1	2	1	1	0	2	2	1	1	1	1	1	1	1	1	1	1	1
375	346	2	32	2	8	1	1	3	3	5	1	2	1	2	0	2	1	1	1	1	1	2	1	1	2	2	2	2
343	110	3	27	2	3	3	1	2	1	6	2	2	1	1	0	2	2	1	1	2	2	2	2	2	2	2	2	2
344	430	1	24	3	1	5	1	1	3	5	2	2	1	1	0	2	1	1	1	1	1	1	1	1	1	1	1	1
345	358	2	28	2	2	4	1	1	1	5	1	2	1	1	0	2	2	1	1	1	1	1	1	1	1	1	1	1
347	28	6	26	2	2	4	1	2	1	5	1	2	1	2	0	2	2	1	1	2	2	2	2	2	2	2	2	1
536	557	1	23	3	1	5	1	3	3	7	1	2	1	2	1	3	3	1	1	1	1	1	1	1	1	1	1	1
740	223	3	26	2	5	1	1	3	3	5	1	2	1	2	0	2	3	1	1	1	2	2	1	2	2	1	2	2
741	364	2	19	3	1	5	1	1	1	5	2	2	1	2	0	2	2	1	1	1	1	2	1	1	2	1	1	2
1039	210	3	28	2	4	2	1	1	3	5	1	2	1	1	0	2	2	1	1	1	1	1	1	1	1	1	1	1
354	672	1	25	2	2	4	1	2	1	6	1	2	1	2	0	2	2	1	1	1	1	1	1	1	1	1	1	1
451	315	2	25	2	2	4	1	2	2	6	2	1	2	2	0	2	2	1	1	1	1	1	1	1	1	1	1	1
85	583	1	29	2	4	2	1	1	1	5	1	2	1	2	0	2	2	1	1	1	1	1	1	1	1	1	1	1
198	241	3	28	2	2	4	1	1	1	5	1	2	2	2	0	2	2	1	1	1	1	1	1	1	1	1	1	1
199	364	2	32	2	4	2	1	1	1	5	1	2	1	2	0	2	2	1	1	1	1	1	1	1	1	1	1	1
232	289	2	25	2	1	5	1	1	1	5	1	2	1	1	0	2	2	1	1	1	1	1	1	1	1	1	1	1
393	297	2	24	3	1	5	1	1	1	5	1	2	1	1	0	2	2	1	1	1	1	1	1	1	1	1	1	1
732	424	1	26	2	3	3	1	1	1	5	1	2	1	2	0	2	1	1	1	1	1	2	1	1	2	1	1	2
762	246	3	26	2	1	5	1	2	1	5	1	2	1	2	0	2	2	1	1	1	1	1	1	1	1	1	1	1
400	156	3	25	2	5	1	1	3	2	6	2	2	2	1	1	2	2	1	1	2	2	2	2	2	2	2	2	2
575	178	3	21	3	1	5	1	1	2	6	2	2	2	1	0	2	2	1	1	1	1	1	1	1	1	2	2	1
96	207	3	29	2	3	3	1	2	2	6	1	2	1	2	0	2	2	1	1	1	1	1	1	1	1	1	1	1
391	208	3	33	2	2	4	1	1	1	6	1	2	1	1	0	2	2	1	1	1	1	1	1	1	1	1	1	1
423	234	3	30	2	2	4	1	1	1	5	1	2	1	1	0	2	2	1	1	1	1	1	1	1	1	1	1	1
424	322	2	31	2	2	4	1	1	1	5	1	2	1	1	0	2	2	1	1	1	1	2	1	1	2	1	1	2
768	463	1	26	2	2	4	1	2	2	6	1	2	1	1	0	2	1	1	1	1	1	1	1	1	1	1	1	1
565	474	1	26	2	4	2	1	1	1	5	1	2	1	1	0	2	2	1	1	1	1	1	1	1	1	1	1	1
571	371	1	36	1	5	1	1	1	1	5	1	2	1	1	0	2	2	1	1	1	1	1	1	1	1	1	1	1
573	247	3	35	1	3	3	1	1	1	5	1	2	1	2	1	2	2	1	1	1	1	1	1	1	1	1	1	1
378	115	3	22	3	1	5	1	1	3	5	2	2	1	2	0	2	1	1	1	1	1	2	1	1	2	1	1	2
379	330	2	34	2	1	5	1	1	1	5	1	2	1	2	0	2	2	1	1	1	1	1	1	1	1	1	1	1
381	222	3	27	2	2	4	1	1	2	5	2	2	1	2	0	2	2	1	1	1	1	1	1	1	1	1	1	1
360	556	1	27	2	2	4	1	3	2	6	2	1	2	2	1	2	2	1	1	1	1	1	1	1	1	1	1	1
453	638	1	22	3	2	4	1	3	3	5	2	2	2	2	0	2	1	1	1	1	1	1	1	1	1	2	2	2
454	660	1	29	2	1	5	1	2	1	5	2	2	1	1	0	2	2	1	1	1	1	2	2	2	2	2	2	2
455	654	1	30	2	3	3	1	1	2	5	2	2	2	1	0	2	2	1	1	1	1	1	1	1	1	1	1	1
774	260	3	30	2	1	5	1	1	1	6	2	2	1	2	0	2	2	1	1	1	1	1	1	1	1	1	1	1
340	396	1	30	2	2	4	1	1	1	5	1	2	1	1	0	2	2	1	1	1	1	1	1	1	1	1	1	1
342	702	1	23	3	1	5	1	1	1	5	1	2	1	1	0	2	2	1	1	1	1	2	1	1	2	1	1	2
777	172	3	23	3	2	4	1	1	3	6	1	2	1	1	0	2	1	1	1	1	1	1	1	1	1	1	1	1
779	107	3	28	2	3	3	1	1	1	5	1	2	1	2	0	2	2	1	1	1	1	2	1	1	2	1	1	2
567	421	1	26	2	4	2	1	3	1	6	2	2	1	2	1	3	3	1	1	1	1	1	1	1	1	1	1	1
568	33	6	39	1	5	1	1	1	1	5	1	2	1	1	0	2	2	1	1	2	2	2	2	2	2	2	2	1
570	533	1	24	3	2	4	1	1	1	5	1	2	1	1	0	2	2	1	1	1	1	1	1	1	1	1	1	1
1079	121	3	28	2	1	5	1	2	2	5	1	2	1	2	1	2	2	1	1	1	2	2	1	2	2	1	2	2
1088	75	4	30	2	4	2	1	1	1	5	1	2	1	2	0	2	2	1	1	1	2	2	1	2	2	1	2	2
1097	62	5	26	2	1	5	1	1	1	5	1	2	1	2	0	2	2	1	1	2	2	2	2	2	2	2	2	2
363	447	1	28	2	3	3	1	1	3	5	1	2	1	1	1	2	2	1	1	1	2	2	1	2	2	1	2	2
417	148	3	29	2	3	3	1	2	3	6	2	2	2	1	0	2	1	1	1	1	1	1	1	1	1	1	1	1
418	615	1	18	3	2	4	1	2	3	6	2	1	2	1	1	3	3	1	1	2	2	2	2	2	2	2	2	2
420	193	3	19	3	1	5	1	3	3	5	2	2	2	1	0	2	2	1	1	1	1	2	1	1	2	1	1	2
421	356	2	20	3	1	5	1	3	2	7	1	2	1	1	0	2	2	1	1	1	1	2	1	1	2	1	1	2
99	123	3	21	3	2	4	1	1	1	5	1	2	1	1	0	2	1	1	1	1	1	1	1	1	1	1	1	1
425	34	6	19	3	1	5	1	1	3	6	1	2	1	1	0	2	1	1	1	2	2	2	2	2	2	2	2	1
1067	77	4	28	2	2	4	1	1	1	6	1	2	1	1	0	2	2	1	1	2	2	2	2	2	2	2	2	2
1068	343	2	27	2	4	2	1	3	2	6	1	2	1	1	0	3	3	1	1	1	2	2	1	2	2	1	2	2
1107	354	2	30	2	2	4	1	2	2	6	1	2	1	1	0	2	2	1	1	1	1	1	1	1	1	1	1	1
1109	461	1	30	2	4	2	1	2	1	6	1	2	1	1	0	2	2	1	1	1	1	1	1	1	1	1	1	1
1110	62	5	25	2	2	4	1	1	1	6	1	2	1	1	0	2	2	1	1	1	2	2	1	2	2	1	2	1
436	485	1	23	3	1	5	1	1	1	5	1	2	1	2	0	2	2	1	1	1	1	1	1	1	1	1	1	1
437	276	2	34	2	4	2	1	1	1	5	1	2	1	2	2	2	2	1	1	1	1	1	1	1	1	1	1	1
441	602	1	25	2	1	5	1	1	1	5	1	2	1	2	0	2	2	1	1	1	1	1	1	1	1	1	1	1
1089	572	1	24	3	1	5	1	1	2	5	1	2	1	2	0	2	2	1	1	1	1	1	1	1	1	1	1	1
189	368	1	27	2	4	2	1	1	3	5	1	2	1	1	0	2	2	1	1	1	1	1	1	1	1	1	1	1
192	125	3	22	3	2	4	1	2	2	5	1	2	1	1	0	2	2	1	1	1	1	1	1	1	1	1	1	1
186	258	3	36	1	4	2	1	1	1	5	1	2	1	2	0	2	2	1	1	1	1	1	1	1	1	1	1	1
736	58	5	23	3	2	4	1	2	2	5	1	2	1	1	0	2	2	1	1	1	2	2	1	2	2	1	2	1
786	53	5	26	2	4	2	1	2	1	5	2	2	1	1	0	2	2	1	1	2	2	2	2	2	2	2	2	2
923	298	2	21	3	1	5	1	1	2	6	1	2	1	1	0	2	2	1	1	1	1	1	1	1	1	1	1	1
445	231	3	30	2	6	1	1	2	2	5	1	2	1	1	0	2	2	1	1	1	1	1	1	1	1	1	1	1
1095	405	1	22	3	2	4	1	2	2	5	1	2	1	1	0	2	1	1	1	1	1	2	1	1	2	1	1	2
1099	57	5	29	2	3	3	1	2	1	5	1	1	2	1	0	2	1	1	1	1	2	2	1	2	2	1	2	1
1071	294	2	34	2	3	3	1	1	1	5	2	2	2	1	0	2	2	1	1	1	1	1	1	1	1	1	1	1
907	600	1	28	2	2	4	1	1	2	6	1	2	1	1	0	2	2	1	1	1	1	1	1	1	1	1	1	1
245	235	3	30	2	2	4	1	1	3	6	1	2	1	1	0	2	2	1	1	1	1	1	1	1	1	1	1	1
248	617	1	48	1	6	1	1	3	3	6	2	2	1	1	2	3	3	1	1	1	1	1	1	1	1	1	1	1
308	288	2	30	2	1	5	1	2	1	5	1	2	1	1	0	2	2	1	1	1	1	1	1	1	1	1	1	1
861	694	1	22	3	1	5	1	2	1	6	2	2	1	1	0	2	2	1	1	1	1	1	1	1	1	1	1	1
706	300	2	22	3	1	5	1	1	2	6	2	2	1	2	0	2	2	1	1	2	2	2	2	2	2	2	2	2
716	325	2	45	1	3	3	1	3	3	7	1	1	2	2	0	2	1	1	1	1	1	1	1	1	1	1	1	1
717	240	3	29	2	4	2	1	1	1	5	1	1	2	2	0	3	3	1	1	1	1	1	1	1	1	1	1	1
863	331	2	27	2	4	2	1	2	2	6	1	1	2	2	0	2	2	1	1	1	1	2	1	1	2	1	1	2
334	191	3	30	2	1	5	1	1	1	5	1	2	1	1	0	2	2	1	1	1	1	1	1	1	1	1	1	1
335	184	3	32	2	6	1	1	2	3	6	1	2	1	1	0	3	3	1	1	1	1	1	1	1	1	2	2	1
855	518	1	27	2	1	5	1	1	1	7	1	2	1	1	0	2	2	1	1	1	1	1	1	1	1	1	1	1
856	634	1	21	3	2	4	1	3	3	6	2	2	1	1	0	3	3	1	1	1	1	1	1	1	1	1	1	1
857	417	1	25	2	1	5	1	1	1	5	2	2	1	1	0	3	3	1	1	1	1	1	1	1	1	1	1	1
865	156	3	32	2	2	4	1	1	1	5	1	2	1	1	0	2	2	1	1	1	1	1	1	1	1	1	1	1
209	319	2	21	3	2	4	1	1	1	5	1	2	1	1	0	2	2	1	1	1	1	1	1	1	1	1	1	1
516	163	3	28	2	2	4	1	2	1	6	2	2	1	2	0	3	3	1	1	1	1	1	1	1	1	1	1	1
517	351	2	22	3	3	3	1	2	2	6	2	2	1	2	0	3	3	1	1	1	1	1	1	1	1	1	1	1
518	585	1	24	3	1	5	1	3	2	5	1	2	1	2	0	2	2	1	1	1	1	1	1	1	1	1	1	1
519	199	3	19	3	1	5	1	1	1	5	2	2	1	1	0	2	2	1	1	1	1	1	1	1	1	1	1	1
206	208	3	25	2	2	4	1	1	1	6	2	2	1	2	0	2	2	1	1	1	1	1	1	1	1	1	1	1
317	443	1	26	2	1	5	1	2	2	5	1	2	1	2	0	2	1	1	1	1	1	1	1	1	1	1	1	1
318	67	5	27	2	4	2	1	1	1	5	1	2	1	1	0	2	1	1	1	2	2	2	2	2	2	2	2	2
503	458	1	35	1	4	2	1	2	3	6	1	2	1	2	0	2	1	1	1	1	1	2	1	1	2	1	1	2
504	262	3	24	3	4	2	1	3	2	7	1	1	2	2	0	2	1	1	1	1	1	2	1	1	2	1	1	2
505	333	2	23	3	1	5	1	1	2	5	2	2	1	1	0	2	1	1	1	1	1	1	1	1	1	1	1	1
730	76	4	23	3	2	4	1	2	2	5	1	2	1	2	0	2	1	1	1	2	2	2	2	2	2	2	2	2
748	70	4	26	2	2	4	1	1	1	6	1	2	1	2	0	2	1	1	1	1	2	2	1	2	2	1	2	2
749	566	1	29	2	3	3	1	2	1	7	2	2	1	2	0	3	3	1	1	1	1	1	1	1	1	1	1	1
302	304	2	30	2	3	3	1	2	1	6	1	2	2	1	0	2	2	1	1	1	1	1	1	1	1	1	1	1
303	235	3	28	2	3	3	1	1	1	5	1	2	1	1	0	2	2	1	1	1	1	1	1	1	1	1	1	1
520	311	2	25	2	1	5	1	1	1	5	1	2	1	1	0	2	2	1	1	1	1	1	1	1	1	1	1	1
528	173	3	29	2	1	5	1	1	1	5	1	2	1	2	0	2	2	1	1	1	1	2	1	1	2	1	1	2
722	211	3	25	2	2	4	1	1	1	6	1	2	1	2	0	2	2	1	1	1	1	1	1	1	1	1	1	1
902	553	1	30	2	4	2	1	3	3	5	1	2	1	2	0	2	2	1	1	1	1	1	1	1	1	1	1	1
904	156	3	20	3	1	5	1	1	1	6	1	2	1	2	0	2	2	1	1	1	1	2	1	1	2	1	1	2
524	579	1	19	3	1	5	1	2	1	5	2	2	1	2	0	2	2	1	1	1	1	1	1	1	1	1	1	1
1031	319	2	25	2	3	3	1	1	1	5	1	2	1	2	0	2	1	1	1	1	1	1	1	1	1	1	1	1
307	70	4	26	2	3	3	1	1	1	6	1	2	1	1	0	2	1	1	1	1	2	2	1	2	2	1	2	2
500	469	1	29	2	4	2	1	3	2	6	1	2	1	2	0	2	2	1	1	1	2	2	1	2	2	1	2	2
511	286	2	19	3	1	5	1	2	2	5	1	2	1	1	0	2	2	1	1	1	1	1	1	1	1	1	1	1
512	244	3	29	2	4	2	1	3	1	7	2	2	2	2	1	2	3	1	1	1	1	1	1	1	1	1	1	1
866	190	3	24	3	4	2	1	3	2	6	1	2	1	2	0	2	3	2	2	1	2	2	1	2	2	1	2	2
867	89	4	25	2	1	5	1	2	2	5	1	2	1	2	0	2	3	1	1	2	2	2	2	2	2	2	2	2
870	107	3	24	3	2	4	1	1	1	5	1	2	1	2	1	2	3	1	1	1	1	1	1	1	1	1	1	1
897	526	1	27	2	3	3	1	2	2	5	1	2	1	2	0	3	3	1	1	1	1	1	1	1	1	1	1	1
296	40	6	21	3	2	4	1	2	2	5	1	2	2	1	0	2	2	1	1	1	2	2	1	2	2	1	2	1
301	233	3	26	2	1	5	1	1	1	5	1	2	2	2	0	2	2	1	1	1	1	1	1	1	1	1	1	1
642	200	3	22	3	3	3	1	3	3	6	1	2	1	2	0	2	2	1	1	1	1	2	1	1	2	1	1	2
645	166	3	25	2	1	5	1	2	2	5	1	2	1	2	0	2	1	1	1	1	1	1	1	1	1	1	1	1
494	615	1	20	3	3	3	1	2	2	6	2	2	2	1	0	2	1	1	1	1	1	1	1	1	1	1	1	1
911	107	3	20	3	2	4	1	1	3	5	1	2	2	1	0	2	2	1	1	1	1	2	1	1	2	1	1	2
914	692	1	27	2	2	4	1	1	2	6	2	2	2	1	0	2	1	1	1	1	1	1	1	1	1	1	1	1
298	241	3	30	2	1	5	1	2	1	6	2	1	2	2	0	3	3	1	1	1	1	2	2	2	2	2	2	2
300	137	3	20	3	3	3	1	1	1	7	2	1	2	1	0	2	2	1	1	1	1	2	2	2	2	2	2	2
720	445	1	31	2	2	4	1	2	1	5	2	2	2	2	0	2	2	1	1	1	2	2	2	2	2	2	2	2
916	113	3	29	2	2	4	1	1	1	5	2	2	1	1	0	2	2	1	1	1	1	2	1	1	2	1	1	2
702	243	3	30	2	5	1	1	2	1	5	1	2	1	2	0	2	1	1	1	1	1	1	1	1	1	1	1	1
711	225	3	24	3	2	4	1	1	1	6	1	2	1	1	0	2	1	1	1	1	1	1	1	1	1	1	1	1
712	170	3	19	3	2	4	2	3	2	6	1	2	1	2	0	2	2	1	1	1	2	2	1	2	2	1	2	2
1064	536	1	30	2	4	2	1	1	1	5	1	2	1	2	0	2	1	1	1	1	1	1	1	1	1	1	1	1
1050	289	2	30	2	3	3	1	2	2	6	2	2	2	2	0	2	1	1	1	1	1	1	1	1	1	1	1	1
1051	91	4	24	3	4	2	1	3	3	7	2	2	2	2	1	2	1	1	1	1	1	2	1	1	2	1	1	1
1054	562	1	27	2	1	5	1	1	1	5	2	2	2	2	0	2	2	1	1	1	1	1	1	1	1	1	1	1
1055	70	4	19	3	1	5	1	1	1	6	2	2	2	2	0	2	2	1	1	1	1	2	1	1	2	1	1	1
1056	415	1	30	2	2	4	1	3	2	5	2	2	2	2	0	2	1	1	1	1	1	1	1	1	1	1	1	1
1060	464	1	30	2	3	3	1	3	3	5	2	2	2	2	0	2	2	1	1	1	1	1	1	1	1	1	1	1
553	61	5	35	1	6	1	1	3	1	5	1	2	1	2	0	2	2	1	1	2	2	2	2	2	2	2	2	2
887	599	1	26	2	2	4	1	2	1	5	1	2	1	2	0	2	2	1	1	1	1	1	1	1	1	1	1	1
592	600	1	44	1	3	3	1	3	1	5	2	2	1	2	0	2	2	1	1	1	1	1	1	1	1	1	1	1
654	204	3	27	2	2	4	1	2	3	5	2	2	1	2	0	2	2	1	1	1	1	1	1	1	1	1	1	1
687	308	2	31	2	5	1	1	3	2	6	1	2	1	2	0	2	3	1	1	1	1	1	1	1	1	1	1	1
321	389	1	29	2	1	5	1	2	2	5	1	2	2	2	0	2	1	1	1	1	1	1	1	1	1	1	1	1
679	332	2	27	2	2	4	1	2	3	5	2	2	1	2	0	2	2	1	1	1	1	1	1	1	1	1	1	1
680	43	5	24	3	3	3	1	1	2	6	1	2	1	1	0	2	2	1	1	2	2	2	2	2	2	2	2	2
668	550	1	31	2	3	3	1	2	1	5	1	2	1	1	0	2	1	1	1	1	1	1	1	1	1	1	1	1
675	243	3	24	3	3	3	1	2	3	5	1	2	1	1	0	2	1	1	1	1	1	1	1	1	1	1	1	1
678	537	1	33	2	7	1	1	2	1	5	1	2	1	1	0	2	1	1	1	1	1	1	1	1	1	1	1	1
482	579	1	25	2	1	5	1	1	2	5	1	2	1	1	0	2	2	1	1	1	1	1	1	1	1	1	1	1
557	571	1	29	2	2	4	1	1	3	5	1	2	1	1	0	2	2	1	1	1	1	1	1	1	1	1	1	1
559	571	1	35	1	2	4	1	3	2	5	1	2	1	2	0	2	2	2	2	1	1	1	1	1	1	1	1	2
560	191	3	32	2	2	4	1	3	2	5	1	2	2	1	0	2	2	1	1	1	1	1	1	1	1	1	1	1
561	71	4	31	2	3	3	1	1	1	5	2	2	1	1	0	1	2	1	1	1	2	2	1	2	2	1	2	2
607	183	3	32	2	4	2	1	1	1	6	1	2	2	1	0	2	1	1	1	1	1	1	1	1	1	1	1	1
631	371	1	28	2	1	5	1	1	1	5	1	2	1	2	0	2	1	1	1	1	1	1	1	1	1	1	1	1
884	391	1	22	3	2	4	1	2	3	6	1	2	1	1	1	2	1	1	1	1	1	1	1	1	1	1	1	1
983	238	3	29	2	1	5	1	1	1	5	1	2	1	2	0	2	2	1	1	1	1	1	1	1	1	1	1	1
984	169	3	29	2	2	4	1	1	1	5	1	2	1	2	0	2	2	1	1	1	1	1	1	1	1	1	1	1
985	146	3	19	3	1	5	1	1	1	5	1	2	1	2	0	2	2	1	1	1	1	1	1	1	1	1	1	1
1000	99	3	27	2	1	5	1	1	1	5	1	2	1	2	0	2	2	1	1	1	1	1	1	1	1	1	1	1
1102	251	3	30	2	1	5	1	1	1	5	1	2	1	2	0	2	2	1	1	1	1	1	1	1	1	1	1	1
873	263	3	17	3	1	5	1	3	3	6	2	2	2	2	0	3	3	1	1	1	2	2	2	2	2	2	2	2
894	219	3	30	2	3	3	1	1	1	6	1	2	1	2	0	2	2	1	1	1	1	2	1	1	2	1	1	2
895	250	3	25	2	3	3	1	3	3	6	1	1	2	2	0	3	3	1	1	1	2	2	1	2	2	1	2	2
664	546	1	26	2	1	5	1	1	1	5	2	2	2	2	0	2	2	1	1	1	1	1	1	1	1	1	1	1
624	369	1	23	3	1	5	1	3	1	5	1	2	1	2	0	2	2	1	1	1	1	2	1	1	2	1	1	2
1119	53	5	19	3	2	4	1	1	3	5	2	2	1	1	0	2	1	1	1	1	2	2	1	2	2	1	2	1
621	574	1	22	3	1	5	1	2	2	5	1	2	1	2	0	2	2	1	1	1	1	1	1	1	1	1	1	1
697	363	2	27	2	1	5	1	3	1	6	1	2	1	2	0	2	1	1	1	1	1	1	1	1	1	1	1	1
699	105	3	31	2	3	3	1	3	3	6	1	2	1	2	0	2	1	1	1	1	2	2	1	2	2	1	2	2
700	216	3	25	2	2	4	1	2	3	6	1	2	1	2	0	2	1	1	1	2	2	2	2	2	2	2	2	2
753	313	2	34	2	5	1	1	3	3	5	1	2	2	2	0	2	1	1	1	1	1	1	1	1	1	1	1	1
640	212	3	36	1	6	1	1	2	1	5	1	2	1	2	0	2	2	1	1	1	1	1	1	1	1	1	1	1
657	321	2	22	3	3	3	1	3	1	6	1	2	1	2	0	2	2	1	1	1	1	1	1	1	1	1	1	1
659	382	1	26	2	1	5	1	1	1	5	1	2	1	2	0	2	1	1	1	1	1	1	1	1	1	1	1	1
1329	38	6	30	2	3	3	2	2	1	6	1	2	1	1	2	2	2	1	1	2	2	2	2	2	2	2	2	1
1330	253	3	32	2	3	3	1	2	1	5	1	2	1	1	0	2	2	1	1	1	1	1	1	1	1	1	1	1
1331	221	3	25	2	3	3	2	2	2	6	1	2	1	1	0	2	2	1	1	1	1	1	1	1	1	1	1	1
1332	166	3	30	2	5	1	2	2	1	6	2	2	2	1	0	2	3	1	1	1	1	1	1	1	1	1	1	1
1334	388	1	39	1	3	3	2	3	3	7	2	1	2	2	0	2	1	1	1	1	1	1	1	1	1	1	1	1
1335	5	6	29	2	4	2	2	1	1	7	1	2	2	2	2	3	3	1	1	2	2	2	2	2	2	2	2	1
1338	20	6	25	2	2	4	2	2	2	6	2	2	2	2	0	2	1	1	1	2	2	2	2	2	2	2	2	1
1341	643	1	27	2	1	5	2	2	2	6	2	2	2	1	0	2	2	1	1	1	1	1	1	1	1	1	1	1
1342	183	3	35	1	5	1	2	2	1	6	2	2	1	2	0	2	1	1	1	1	1	1	1	1	1	1	1	1
1343	127	3	22	3	2	4	2	2	3	6	1	2	1	2	0	2	2	1	1	1	1	1	1	1	1	1	1	1
1344	267	3	34	2	3	3	2	3	1	5	1	2	1	1	0	2	1	1	1	1	1	1	1	1	1	1	1	1
1348	559	1	29	2	2	4	2	1	1	5	1	2	1	2	0	2	2	1	1	1	1	1	1	1	1	1	1	1
1350	22	6	25	2	4	2	2	1	1	5	2	2	2	2	0	2	2	1	1	2	2	2	2	2	2	2	2	1
1352	330	2	19	3	2	4	2	1	1	7	2	2	2	2	0	2	2	1	1	1	1	1	1	1	1	1	1	1
1353	382	1	22	3	2	4	2	1	1	5	1	2	1	2	0	2	2	1	1	1	1	1	1	1	1	1	1	1
1356	232	3	25	2	4	2	2	2	1	6	2	2	2	2	0	3	3	1	1	1	1	2	2	2	2	2	2	2
1357	134	3	23	3	5	1	2	3	3	8	2	2	2	2	0	2	2	1	1	1	2	2	1	2	2	1	2	2
1404	227	3	26	2	1	5	2	3	3	8	1	2	1	1	0	3	3	1	1	2	2	2	2	2	2	2	2	2
1405	246	3	25	2	1	5	2	2	1	7	1	2	1	1	1	2	2	1	1	1	1	1	1	1	1	1	1	1
1412	49	5	25	2	3	3	2	2	1	7	2	2	1	2	0	1	3	1	1	2	2	2	2	2	2	2	2	2
1418	266	3	24	3	2	4	2	2	1	7	1	2	2	1	1	3	3	1	1	1	1	1	1	1	1	1	1	1
1428	64	5	27	2	5	1	2	3	2	7	1	2	1	2	2	3	3	1	2	2	2	2	2	2	2	2	2	2
1429	39	6	25	2	2	4	2	2	3	7	1	2	1	2	1	3	3	1	2	2	2	2	2	2	2	2	2	2
1430	4	6	21	3	2	4	2	1	1	6	1	2	1	2	2	3	3	1	1	2	2	2	2	2	2	2	2	1
1452	171	3	28	2	2	4	2	1	1	5	1	1	2	1	0	2	2	1	1	1	1	1	1	1	1	1	1	1
1454	481	1	21	3	1	5	2	2	1	6	1	2	1	1	0	2	2	1	1	1	1	1	1	1	1	1	1	1
1456	315	2	27	2	4	2	2	2	1	6	1	1	2	1	0	2	2	1	1	1	1	1	1	1	1	1	1	1
1457	414	1	40	1	8	1	2	3	1	8	2	2	2	2	1	2	2	1	1	1	1	1	1	1	1	1	1	1
1458	626	1	24	3	5	1	2	2	2	6	2	2	2	1	2	3	3	1	1	1	1	1	1	1	1	1	1	1
1460	48	5	29	2	7	1	2	3	3	8	2	2	2	2	0	2	2	1	1	2	2	2	2	2	2	2	2	2
1464	556	1	27	2	1	5	2	1	2	5	1	2	1	1	0	2	2	2	2	1	1	1	1	1	1	1	1	2
1467	106	3	24	3	5	1	2	3	3	9	2	2	1	2	2	2	2	1	1	1	1	1	2	2	2	2	2	2
1469	402	1	23	3	3	3	2	1	1	7	2	2	1	1	2	2	2	1	1	1	1	1	1	1	1	1	1	1
1476	326	2	31	2	1	5	2	1	1	6	1	2	1	2	0	3	3	1	1	1	1	1	1	1	1	1	1	1
1477	685	1	25	2	6	1	2	2	2	7	1	2	1	1	2	2	2	1	1	1	1	1	1	1	1	1	1	1
1481	305	2	27	2	2	4	2	2	1	5	2	2	1	1	1	3	3	1	1	1	1	1	1	1	1	1	1	1
1504	276	2	28	2	4	2	2	1	1	6	1	2	1	2	0	2	2	1	1	1	1	1	1	1	1	1	1	1
1506	521	1	24	3	2	4	2	2	1	6	2	2	1	2	0	2	2	1	1	1	1	1	1	1	1	1	1	1
1507	108	3	19	3	1	5	2	1	1	5	1	2	1	2	2	2	2	1	1	1	2	2	1	2	2	2	1	2
1509	370	1	19	3	1	5	2	2	1	7	2	2	1	2	0	2	2	1	1	1	1	1	1	1	1	1	1	1
1511	221	3	28	2	4	2	2	1	1	6	1	2	1	1	0	2	2	1	1	1	1	1	1	1	1	1	1	1
1512	47	5	27	2	5	1	2	1	1	6	1	2	1	1	2	2	2	1	1	1	2	2	1	2	2	1	2	1
1513	242	3	32	2	7	1	2	3	1	6	1	2	1	1	2	2	3	1	1	1	1	1	1	1	1	1	1	1
1514	584	1	19	3	1	5	2	1	3	6	1	2	1	1	2	2	1	1	1	1	1	1	1	1	1	1	1	1
1516	682	1	31	2	3	3	2	1	1	6	1	2	1	1	0	2	2	1	1	1	2	2	1	2	2	1	2	2
1517	144	3	26	2	2	4	2	2	1	6	1	2	1	1	0	2	2	1	1	1	1	2	1	1	2	1	1	2
1518	348	2	25	2	2	4	2	1	1	6	1	2	1	1	0	2	2	1	1	1	1	2	1	1	2	1	1	2
1520	123	3	21	3	3	3	2	1	1	5	1	2	1	1	0	3	3	1	1	1	1	2	1	1	2	1	1	2
1521	307	2	30	2	1	5	2	1	1	6	2	2	1	2	0	2	2	1	1	1	1	2	1	1	2	1	1	2
1523	556	1	23	3	1	5	2	1	1	5	2	1	2	2	0	2	2	1	1	1	1	1	1	1	1	1	1	1
1525	108	3	17	3	1	5	2	2	2	7	2	2	1	2	2	2	3	1	1	1	2	2	1	2	2	1	2	2
1526	269	3	26	2	2	4	2	2	2	7	1	1	2	1	0	2	2	1	1	2	2	2	2	2	2	2	2	2
1576	297	2	25	2	1	5	1	2	1	6	1	1	2	1	0	2	2	1	1	2	2	2	2	2	2	1	2	2
1581	581	1	30	2	4	2	1	1	1	6	1	2	2	1	2	2	2	1	1	1	1	1	1	1	1	1	1	1
1601	648	1	28	2	2	4	1	2	3	5	1	2	1	1	1	2	2	1	1	2	1	1	1	1	2	2	1	2
1622	432	1	25	2	3	3	1	1	2	5	1	2	1	1	0	2	2	1	1	1	1	1	1	1	1	1	1	1
1634	721	1	30	2	1	5	1	2	3	6	2	2	1	1	0	2	1	1	1	1	1	1	1	1	1	2	1	2
1567	353	2	25	2	2	4	1	1	2	5	1	2	1	1	0	2	2	1	1	1	1	1	1	1	1	1	1	1
1569	186	3	24	3	2	4	1	3	2	5	2	2	1	2	0	2	2	1	1	1	2	2	1	2	2	1	2	2
1585	452	1	26	2	1	5	1	2	1	5	1	2	1	2	1	2	2	1	1	1	1	1	1	1	1	1	1	1
1651	531	1	44	1	10	1	1	3	2	7	1	2	1	1	0	2	2	1	1	1	1	1	1	1	1	1	1	1
1565	659	1	21	3	2	4	1	3	3	5	2	2	1	1	0	2	1	1	1	1	1	1	1	1	1	1	1	1
1612	440	1	24	3	1	5	1	2	2	6	1	2	1	1	0	2	1	1	1	1	1	1	1	1	1	1	1	1
1619	272	2	23	3	2	4	1	2	2	5	2	2	1	1	0	2	1	1	2	1	1	1	1	1	2	1	1	2
1620	111	3	27	2	3	3	1	2	2	6	2	2	1	1	0	2	2	1	1	1	1	2	1	1	2	1	1	2
1644	581	1	27	2	1	5	1	1	1	5	1	2	1	1	0	2	2	1	2	1	1	1	1	1	1	1	1	2
1652	436	1	35	1	5	1	1	3	2	6	1	2	2	1	0	2	2	1	1	1	1	1	1	1	1	1	1	1
1655	263	3	22	3	1	5	1	1	1	6	1	1	2	1	0	2	2	1	1	1	1	1	1	1	1	1	1	1
1572	247	3	21	3	1	5	1	1	1	5	1	2	1	1	0	2	2	1	1	1	1	1	1	1	1	1	1	1
1574	73	4	29	2	3	3	1	1	2	5	1	2	1	1	0	2	2	1	1	2	2	2	2	2	2	2	2	2
1648	400	1	19	3	2	4	1	1	1	5	2	2	1	1	0	2	2	1	1	1	1	1	1	1	1	1	1	1
1616	470	1	32	2	4	2	1	1	1	5	1	2	1	1	0	2	1	1	1	1	1	1	1	1	1	1	1	1
1631	707	1	22	3	1	5	1	3	3	6	1	2	1	2	0	2	1	1	1	1	1	1	1	1	1	1	1	1
1636	483	1	18	3	2	4	1	3	2	6	1	2	2	2	2	2	1	1	1	1	1	1	1	1	1	1	1	1
1641	257	3	26	2	3	3	1	3	1	5	1	2	1	2	0	3	3	1	1	1	1	1	1	1	1	1	1	1
1558	386	1	41	1	7	1	1	2	2	5	1	2	1	1	2	2	2	1	1	1	1	1	1	1	1	1	1	1
1561	295	2	39	1	5	1	1	2	1	5	1	2	1	1	0	2	1	1	1	1	1	1	1	1	1	2	2	2
1597	35	6	29	2	3	3	1	1	1	5	1	2	1	1	0	2	2	1	1	2	2	2	2	2	2	2	2	1
1602	517	1	25	2	1	5	1	1	2	5	1	2	1	1	0	2	2	1	1	1	1	1	1	1	1	2	2	2
1628	31	6	24	3	1	5	1	2	1	5	1	2	1	1	0	2	2	1	1	2	2	2	2	2	2	2	2	1
1580	61	5	21	3	1	5	1	2	2	5	1	2	2	1	0	2	2	1	1	1	2	2	2	2	2	2	2	2
1594	234	3	22	3	1	5	2	3	3	6	2	2	2	2	2	2	1	2	2	1	1	1	1	1	1	1	1	2
1595	318	2	31	2	2	4	1	1	1	5	1	2	1	1	0	2	2	1	1	1	1	1	1	1	1	1	1	1
1633	517	1	33	2	2	4	1	2	2	5	1	2	1	1	1	2	1	1	1	1	1	1	1	1	1	1	1	1
1639	145	3	29	2	1	5	1	2	2	5	1	2	1	1	0	2	2	1	1	1	1	2	1	1	2	1	1	2
1646	878	1	21	3	1	5	1	3	3	6	1	2	1	1	0	2	1	1	1	1	1	1	1	1	1	1	1	1
1635	184	3	24	3	1	5	1	2	1	5	1	2	2	1	0	2	2	1	1	1	1	1	1	1	2	1	2	2
1701	235	3	24	3	2	4	2	3	1	6	2	2	2	2	0	2	1	1	1	1	1	1	1	1	1	1	2	1
1710	223	3	20	3	3	3	2	3	2	7	1	2	1	1	0	2	1	1	1	1	2	2	2	2	2	2	2	2
1713	430	1	30	2	1	5	2	1	1	5	1	2	1	2	0	2	2	1	1	1	1	1	1	1	1	1	1	1
1718	84	4	22	3	1	5	1	2	2	5	1	2	1	2	0	2	1	1	1	1	1	2	1	1	2	1	1	1
1721	582	1	34	2	2	4	2	3	1	5	2	2	1	1	0	2	1	1	1	1	1	1	1	1	1	1	1	1
1724	326	2	20	3	1	5	2	2	1	7	2	2	2	2	0	2	1	1	1	1	2	2	1	2	2	1	2	2
1587	171	3	29	2	1	5	2	3	2	5	1	2	1	1	2	3	3	1	2	1	1	1	1	1	1	1	1	2
1593	421	1	30	2	2	4	2	3	1	7	1	1	2	2	1	2	2	1	1	1	1	1	1	1	1	1	1	1
1617	307	2	20	3	1	5	1	3	1	8	1	2	1	2	1	3	3	1	1	1	1	1	1	1	1	1	1	1
1753	614	1	25	2	4	2	2	1	1	5	1	2	2	1	2	3	3	1	1	1	1	1	1	1	1	1	1	1
1754	176	3	22	3	4	2	2	3	2	7	2	2	2	1	0	2	1	1	1	1	1	1	1	1	1	1	1	1
1757	633	1	35	1	3	3	2	2	3	6	1	1	2	2	0	2	1	1	1	1	1	1	1	1	1	1	1	1
1760	49	5	25	2	2	4	1	1	1	6	1	2	1	1	1	2	2	1	1	2	2	2	2	2	2	2	2	2
1762	347	2	22	3	3	3	2	2	1	6	1	2	2	2	2	2	2	1	1	1	1	1	1	1	1	1	1	1
1768	246	3	34	2	3	3	1	3	2	8	1	2	1	2	2	2	1	1	1	1	1	1	1	1	1	1	1	1
1769	142	3	22	3	2	4	1	3	3	7	1	1	2	2	2	2	2	1	1	2	2	2	2	2	2	2	2	2
1770	612	1	23	3	1	5	1	1	2	7	1	1	2	1	1	2	2	1	1	1	1	1	1	1	1	1	1	1
1775	143	3	25	2	2	4	2	2	2	6	1	1	2	1	2	3	3	1	1	1	1	1	1	1	1	1	1	1
1806	410	1	20	3	4	2	2	2	1	5	1	1	2	1	0	2	2	1	1	1	1	1	1	1	1	1	1	1
1811	501	1	28	2	4	2	2	1	2	5	1	1	2	1	2	2	2	1	1	1	1	1	1	1	1	1	1	1
1812	310	2	21	3	2	4	2	1	1	5	1	2	1	2	0	2	2	1	1	1	1	1	1	1	1	1	1	1
1814	340	2	30	2	2	4	2	1	1	6	1	1	2	1	0	2	2	1	1	1	1	1	1	1	1	1	1	1
1815	262	3	27	2	2	4	2	1	1	5	1	1	2	2	1	2	2	1	1	1	1	1	1	1	1	1	1	1
1816	391	1	30	2	3	3	2	2	1	5	2	2	1	1	0	2	2	1	1	2	2	2	2	2	2	2	2	2
1817	167	3	21	3	1	5	2	2	2	6	2	2	1	1	0	2	2	1	1	1	1	1	1	1	1	1	1	1
1819	464	1	28	2	1	5	2	2	1	5	2	2	1	2	0	2	2	1	1	1	1	1	1	1	1	1	1	1
1831	78	4	30	2	4	2	2	3	3	6	1	2	1	2	0	2	2	1	2	1	1	2	1	1	2	1	1	2
1834	72	4	26	2	1	5	2	1	1	6	2	2	1	1	0	2	2	1	2	1	2	2	1	2	2	1	2	2
1851	174	3	17	3	1	5	2	1	2	6	1	2	1	1	2	2	1	1	1	1	1	1	1	1	1	1	1	1
1858	356	2	23	3	1	5	2	1	1	5	1	2	1	1	0	2	2	1	1	1	1	1	1	1	1	1	1	1
1860	366	1	25	2	3	3	2	3	1	6	2	2	2	2	0	2	2	1	1	1	1	1	1	1	1	1	1	1
1867	191	3	26	2	4	2	2	1	1	5	2	2	1	1	2	2	3	1	1	1	1	1	1	1	1	1	1	1
1868	522	1	34	2	5	1	2	2	1	5	1	2	1	1	0	2	2	1	1	2	2	2	2	2	2	2	2	2
1872	259	3	30	2	4	2	2	1	1	5	1	2	2	2	0	2	1	1	1	1	1	1	1	1	1	1	1	1
1873	67	5	24	3	2	4	2	1	1	5	1	2	1	1	0	2	2	1	1	1	2	2	1	2	2	1	2	1
1876	364	2	32	2	3	3	2	1	2	5	2	2	2	2	0	2	2	1	1	1	1	1	1	1	1	1	1	1
1927	357	2	19	3	1	5	2	2	1	6	1	2	1	1	0	2	2	1	1	1	1	2	2	2	2	2	2	2
1929	244	3	29	2	6	1	2	1	1	6	1	2	1	1	0	2	2	1	1	1	1	1	1	1	1	1	1	1
1970	382	1	26	2	2	4	2	1	1	5	1	2	1	1	0	2	2	1	1	2	2	2	2	2	2	2	2	2
1971	96	4	24	3	2	4	2	2	1	6	2	2	2	2	2	2	2	1	1	1	1	2	1	1	2	1	1	1
2002	60	5	27	2	3	3	1	2	3	6	2	1	2	2	0	2	2	1	1	1	2	2	2	2	2	2	2	2
2005	318	2	30	2	4	2	1	3	3	8	2	2	2	1	2	3	3	1	1	1	1	1	1	1	1	1	1	1
2012	633	1	37	1	4	2	1	1	1	5	2	2	2	2	0	2	2	1	1	1	2	2	1	1	2	2	2	2
2006	174	3	23	3	3	3	1	2	1	6	1	2	1	2	0	2	1	1	1	1	1	1	1	1	1	1	1	1
2007	68	5	22	3	2	4	1	1	1	5	1	2	1	1	0	2	3	1	1	1	2	2	1	2	2	1	2	1
2008	519	1	34	2	2	4	1	1	1	5	1	2	1	2	0	2	2	1	1	1	1	1	1	1	1	1	1	1
2021	409	1	29	2	5	1	1	3	1	5	2	2	2	1	0	2	2	1	1	1	1	1	1	1	1	1	1	1
2024	254	3	35	1	5	1	1	3	3	6	2	2	2	1	1	2	2	1	1	1	2	2	1	2	2	1	2	2
2025	552	1	24	3	1	5	1	1	1	6	2	2	2	2	0	2	2	1	1	1	1	1	1	1	1	1	1	1
2018	135	3	29	2	2	4	1	1	1	5	1	2	1	1	0	2	2	1	1	1	2	2	1	2	2	1	2	2
2029	106	3	24	3	2	4	1	1	1	5	2	2	2	1	0	2	1	1	1	1	1	2	1	1	2	1	1	2
2030	32	6	23	3	2	4	2	1	1	6	2	2	2	2	0	2	2	1	1	2	2	2	2	2	2	2	2	1
2052	154	3	18	3	2	4	2	3	3	8	1	2	1	2	2	3	3	1	1	1	1	2	1	1	2	1	1	2
2054	646	1	25	2	4	2	2	1	1	6	1	2	2	2	0	2	2	1	1	1	1	1	1	1	1	1	1	1
2055	323	2	31	2	4	2	2	2	2	7	1	1	2	2	1	2	1	1	1	1	1	1	1	1	1	1	1	1
2057	52	5	38	1	5	1	2	1	1	6	1	2	1	1	0	2	1	1	1	1	2	2	1	2	2	1	2	1
2058	477	1	24	3	3	3	2	2	1	6	1	2	1	1	0	2	2	1	1	1	1	1	1	1	1	1	1	1
2060	46	5	28	2	4	2	2	1	1	5	1	2	1	1	0	2	2	1	1	1	2	2	1	2	2	1	2	1
2063	274	2	21	3	1	5	2	3	3	6	2	2	2	2	0	2	2	1	1	1	1	1	1	1	1	1	1	1
2068	546	1	18	3	1	5	2	3	1	5	2	2	2	1	2	2	2	1	1	1	1	2	1	1	2	1	1	2
2070	188	3	24	3	4	2	2	2	1	7	2	2	2	2	2	2	2	1	1	2	2	2	2	2	2	2	2	2
2074	366	1	26	2	2	4	2	3	2	7	1	2	1	1	0	2	2	1	1	1	1	1	1	1	1	1	1	1
2076	608	1	35	1	4	2	2	3	1	7	1	2	1	1	0	2	2	1	1	1	1	1	1	1	1	1	1	1
2080	426	1	29	2	4	2	2	2	1	7	1	2	1	2	0	2	2	1	1	1	1	1	1	1	1	1	1	1
2103	386	1	30	2	7	1	2	3	1	7	2	2	1	2	2	2	2	1	1	1	1	1	1	1	1	1	1	1
2104	306	2	18	3	1	5	2	2	1	7	1	2	1	2	0	2	1	1	1	1	1	1	1	1	1	1	1	1
2106	100	3	30	2	8	1	2	2	2	7	1	2	1	1	0	2	2	1	1	1	1	2	1	1	2	1	1	2
2107	376	1	35	1	1	5	2	3	1	5	1	2	1	2	1	2	1	1	1	1	1	2	2	2	2	2	2	2
2108	80	4	22	3	2	4	2	3	3	6	1	2	1	2	0	2	3	1	1	1	1	2	2	2	2	2	2	2
2110	379	1	35	1	2	4	2	1	1	7	1	2	2	2	0	2	2	1	1	1	1	1	2	2	2	2	2	2
2115	207	3	30	2	6	1	2	3	2	7	2	2	1	2	1	3	3	1	1	1	1	1	1	1	1	1	1	1
2119	357	2	20	3	2	4	2	2	1	6	2	2	1	1	0	2	2	1	1	1	1	2	1	1	2	1	1	2
2138	446	1	21	3	2	4	2	2	1	7	1	2	1	2	0	2	1	1	1	1	1	1	1	1	1	1	1	1
2145	502	1	29	2	2	4	2	2	2	6	1	2	1	2	0	2	2	1	1	1	1	1	1	1	1	1	1	1
2146	40	6	27	2	1	5	2	1	1	5	1	2	1	1	0	2	2	1	1	1	2	2	1	2	2	1	2	1
2147	294	2	33	2	1	5	2	1	1	5	1	2	1	1	0	2	2	1	1	1	1	2	1	1	2	1	1	2
2150	624	1	19	3	1	5	2	2	1	6	1	1	2	1	0	2	2	1	1	1	1	1	1	1	1	1	1	1
2179	662	1	35	1	3	3	2	1	1	5	1	2	1	2	0	2	2	1	1	1	1	1	1	1	1	1	1	1
2186	437	1	21	3	2	4	2	3	3	8	2	2	1	2	0	3	3	1	1	1	1	1	1	1	1	1	1	1
2188	320	2	28	2	4	2	2	3	3	8	2	2	1	1	2	3	3	1	1	2	2	2	2	2	2	2	2	2
2189	256	3	37	1	7	1	2	3	3	8	2	2	1	2	2	3	3	1	1	1	1	1	1	1	1	1	1	1
2191	377	1	31	2	8	1	2	3	1	7	2	2	1	2	0	3	3	1	1	1	1	1	1	1	1	1	1	1
2193	321	2	29	2	1	5	2	2	1	5	1	2	1	1	0	2	2	1	1	1	2	1	1	2	1	1	2	2
2194	431	1	21	3	1	5	2	2	1	7	1	2	1	1	0	2	2	1	1	1	1	1	1	1	1	1	1	1
2213	526	1	30	2	5	1	2	3	3	8	1	2	1	1	0	3	3	1	1	1	2	2	1	2	2	1	2	2
2217	211	3	24	3	1	5	2	3	2	7	2	2	2	2	0	2	2	1	1	1	1	1	1	1	1	1	1	1
2218	629	1	27	2	1	5	2	1	1	6	2	2	2	2	1	3	3	1	1	1	1	1	1	1	1	1	1	1
2221	513	1	32	2	2	4	2	2	1	5	1	2	2	1	1	2	2	1	1	1	1	1	1	1	1	1	1	1
2222	551	1	36	1	4	2	2	1	2	5	1	2	2	2	0	2	2	1	1	1	1	1	1	1	1	1	1	1
2223	657	1	29	2	2	4	2	1	1	5	1	2	1	1	1	2	2	1	1	1	1	1	1	1	1	1	1	1
2228	277	2	24	3	2	4	2	2	1	6	2	2	2	2	0	2	2	1	1	1	2	2	1	2	2	1	2	2
2230	444	1	27	2	2	4	2	2	1	5	2	2	2	2	0	2	2	1	1	1	1	1	1	1	1	1	1	1
2231	652	1	25	2	2	4	2	3	3	7	2	2	2	2	1	3	3	1	1	1	1	1	1	1	1	1	1	1
2258	351	2	32	2	4	2	2	3	3	7	1	2	1	2	0	3	3	1	1	2	1	1	2	1	1	2	1	2
2260	682	1	23	3	4	2	2	1	1	5	1	2	2	2	1	3	3	1	1	1	1	2	1	1	2	1	1	2
2264	171	3	19	3	1	5	2	3	3	7	2	2	2	2	1	3	3	1	1	1	1	2	1	1	2	1	1	2
2266	221	3	25	2	2	4	2	1	1	5	1	2	2	2	0	2	2	1	1	1	1	1	1	1	1	1	1	1
2273	117	3	29	2	4	2	2	3	2	7	2	2	2	2	1	1	3	1	1	1	2	2	1	2	2	1	2	2
2301	140	3	32	2	5	1	2	3	1	8	1	2	1	1	0	2	2	1	1	1	1	2	1	1	2	1	1	2
2302	134	3	36	1	10	1	2	3	2	7	1	2	1	1	0	2	2	1	1	1	1	1	1	1	1	1	2	1
2304	258	3	41	1	10	1	2	3	1	8	1	2	1	1	0	3	2	1	1	1	1	1	1	1	1	1	1	1
2311	570	1	29	2	4	2	2	1	1	6	1	2	2	1	2	3	3	1	1	1	1	1	1	1	1	1	1	1
2314	162	3	31	2	4	2	2	2	2	8	1	2	1	2	0	2	2	1	1	1	1	1	1	1	1	1	1	1
2317	538	1	39	1	5	1	2	1	1	6	1	2	1	1	1	2	1	1	1	1	1	1	1	1	1	1	1	1
2319	229	3	30	2	1	5	2	1	1	6	1	2	2	2	0	2	2	1	1	1	1	1	1	1	1	1	1	1
2321	662	1	34	2	5	1	2	3	3	8	2	2	2	2	0	2	1	1	1	1	1	1	1	1	1	1	1	1
2322	192	3	29	2	1	5	2	2	2	8	1	2	2	1	0	2	1	1	1	1	1	1	1	1	1	1	1	1
2323	75	4	25	2	2	4	2	3	1	6	1	2	1	1	0	2	2	1	1	1	2	2	1	2	2	1	2	2
2324	255	3	24	3	3	3	2	2	1	6	2	2	2	2	0	2	1	1	1	1	1	1	1	1	1	1	1	1
2325	512	1	28	2	3	3	2	3	1	8	2	2	2	1	0	3	3	1	1	1	1	1	1	1	1	1	1	1
2357	101	3	29	2	2	4	2	3	3	7	2	2	1	2	2	3	3	1	1	1	2	2	1	2	2	1	2	2
2358	304	2	24	3	1	5	2	3	3	8	2	2	1	2	0	2	2	1	1	1	1	2	1	1	2	1	1	2
2360	254	3	25	2	2	4	2	3	2	7	2	2	2	2	2	3	3	1	1	1	1	1	1	1	1	1	1	1
2361	518	1	31	2	3	3	2	3	1	6	1	2	1	1	0	2	2	1	1	1	1	1	1	1	1	1	1	1
2362	489	1	24	3	2	4	2	1	1	5	1	1	2	1	0	2	2	1	1	1	1	1	1	1	1	1	1	1
2363	302	2	27	2	4	2	2	1	1	5	1	1	2	2	0	2	2	1	1	1	1	1	1	1	1	1	1	1
2371	214	3	22	3	4	2	2	3	1	5	2	2	1	2	0	2	2	1	1	1	1	1	1	1	1	1	1	1
2373	593	1	40	1	3	3	2	3	3	8	2	2	2	2	0	2	1	1	1	1	1	1	1	1	1	1	1	1
2375	80	4	21	3	1	5	2	1	2	5	1	2	1	2	0	2	2	1	1	1	2	2	1	2	2	2	2	2
2376	35	6	40	1	6	1	2	3	2	6	2	2	2	1	1	2	2	1	1	1	2	2	1	2	2	1	2	1
2377	112	3	37	1	7	1	2	1	1	6	2	2	2	1	2	2	2	1	1	1	1	2	1	1	2	1	1	2
2405	316	2	34	2	3	3	2	3	3	8	1	2	1	2	1	2	1	1	1	1	1	1	1	1	1	1	1	1
2406	26	6	27	2	1	5	2	2	1	7	1	2	1	2	0	2	2	1	1	2	2	2	2	2	2	2	2	1
2413	199	3	42	1	2	4	2	2	3	6	1	2	1	1	0	2	1	1	1	1	2	2	1	2	2	1	2	2
2453	692	1	27	2	2	4	2	2	1	5	1	2	1	1	0	3	3	1	1	1	1	1	1	1	1	1	1	1
2454	243	3	39	1	7	1	2	2	1	6	1	1	2	1	0	2	2	1	1	1	1	2	1	1	2	1	1	2
2461	380	1	18	3	3	3	2	2	2	6	1	2	1	2	1	2	2	1	1	1	1	1	1	1	1	1	1	1
2462	521	1	27	2	4	2	2	3	3	8	1	2	1	2	1	3	3	1	1	1	1	1	1	1	1	1	1	1
2467	344	2	22	3	5	1	2	3	3	7	1	1	2	1	2	2	2	1	1	1	1	1	1	1	1	1	1	1
2468	192	3	26	2	4	2	2	3	3	7	2	2	2	2	0	2	2	1	1	1	1	1	1	1	1	1	1	1
2470	162	3	36	1	2	4	2	3	3	7	1	2	1	1	2	2	2	1	1	1	1	1	1	1	1	1	1	1
2472	395	1	26	2	6	1	2	3	3	8	2	2	2	2	2	1	3	1	1	1	2	2	1	2	2	1	2	2
2501	337	2	21	3	1	5	2	3	2	7	2	2	1	2	0	3	3	1	1	1	1	1	1	1	1	1	1	1
2502	161	3	26	2	3	3	2	2	1	6	2	2	1	2	0	2	1	1	1	1	1	1	1	1	1	1	1	1
2503	202	3	17	3	1	5	2	3	2	7	2	2	2	2	1	2	2	1	1	1	1	1	1	1	1	1	1	1
2505	340	2	32	2	5	1	2	1	1	7	2	2	1	2	1	3	3	1	1	1	1	1	1	1	1	1	1	1
2506	300	2	38	1	2	4	2	2	1	7	2	2	2	2	0	3	3	1	1	1	1	1	1	1	1	1	1	1
2507	590	1	19	3	2	4	2	2	3	7	2	2	2	1	2	2	2	1	1	1	1	1	1	1	1	1	1	1
2517	106	3	28	2	6	1	2	2	2	6	2	2	2	2	2	3	3	1	1	1	1	2	1	1	2	1	1	2
2521	163	3	21	3	2	4	2	1	1	5	1	2	1	1	1	2	1	1	1	1	1	2	1	1	2	1	1	2
2524	617	1	26	2	6	1	2	2	1	6	2	2	1	1	1	2	2	1	1	1	1	1	1	1	1	1	1	1
2529	471	1	37	1	5	1	2	1	1	5	1	2	2	2	1	2	2	1	1	1	1	1	1	1	1	1	1	1
2530	721	1	30	2	6	1	2	2	1	6	1	2	1	1	0	2	2	1	1	1	1	1	1	1	1	1	1	1
2551	658	1	24	3	2	4	2	2	2	7	2	2	2	2	2	1	3	1	1	1	1	1	1	1	1	1	1	1
2552	235	3	35	1	9	1	2	3	3	7	2	2	1	2	2	2	2	1	1	1	1	2	1	1	2	1	1	2
2553	531	1	23	3	2	4	2	3	3	5	1	2	1	2	2	3	3	1	1	1	1	1	1	1	1	1	1	1
2559	683	1	25	2	3	3	2	2	1	6	1	2	1	2	0	3	3	1	1	1	1	1	1	1	1	1	1	1
2563	325	2	21	3	3	3	2	2	1	7	1	1	2	2	0	3	3	1	1	1	1	1	1	1	1	1	1	1
2564	305	2	18	3	1	5	2	1	2	7	1	2	1	1	0	2	2	1	1	1	1	1	1	1	1	1	1	1
2565	602	1	37	1	7	1	2	2	3	8	1	1	2	1	2	3	3	1	1	1	1	1	1	1	1	1	1	1
2566	469	1	42	1	8	1	2	3	3	8	1	2	1	1	2	3	3	1	1	1	2	2	1	2	2	1	2	2
2567	593	1	24	3	4	2	2	3	1	6	1	2	1	1	0	2	2	1	1	1	1	2	1	1	2	1	1	2
2568	441	1	24	3	5	1	2	2	1	6	1	2	1	1	0	3	3	1	1	1	2	2	1	2	2	1	2	2
2572	678	1	36	1	5	1	2	2	3	6	2	2	1	2	0	2	1	1	1	1	1	1	1	1	1	1	1	1
2573	655	1	36	1	6	1	2	2	2	6	2	2	2	2	1	2	1	1	1	2	2	2	2	2	2	2	2	2
2575	275	2	19	3	1	5	2	3	2	6	2	2	2	2	0	3	3	1	1	1	1	1	1	1	1	1	1	1
2577	224	3	30	2	5	1	2	2	1	6	2	2	2	1	0	3	3	1	1	1	1	1	1	1	1	1	1	1
2578	560	1	25	2	2	4	2	1	3	5	2	2	2	2	0	2	2	1	1	1	1	1	1	1	1	1	1	1
2579	577	1	24	3	3	3	2	1	1	5	1	2	1	2	0	2	2	1	1	1	1	1	1	1	1	1	1	1
2580	148	3	27	2	2	4	2	2	2	6	1	2	1	1	0	2	2	1	1	1	1	1	1	1	1	1	1	1
2614	174	3	25	2	1	5	1	3	1	6	1	2	1	2	1	2	2	1	1	1	1	1	1	1	1	1	1	1
2616	216	3	20	3	1	5	1	3	1	5	1	2	1	1	1	2	3	1	1	1	1	1	1	1	1	1	1	1
2634	269	3	27	2	4	2	2	3	2	8	2	2	2	2	2	3	3	1	1	1	1	1	1	1	1	1	1	1
2635	427	1	26	2	1	5	2	1	1	5	2	2	1	2	0	2	2	1	1	1	1	1	1	1	1	1	1	1
2644	108	3	35	1	4	2	2	2	1	7	1	2	1	1	1	3	2	1	1	1	2	2	1	2	2	1	2	2
2645	250	3	35	1	3	3	2	1	3	7	1	2	1	1	0	2	2	1	1	1	1	2	1	1	2	1	1	2
2647	78	4	24	3	1	5	2	2	3	8	2	2	1	2	0	3	3	1	1	2	2	2	2	2	2	2	2	2
2648	472	1	26	2	1	5	2	2	1	5	1	2	1	2	1	2	1	1	1	2	1	1	2	1	1	2	1	2
2649	313	2	25	2	1	5	2	1	1	5	1	1	2	2	0	2	2	1	1	1	2	2	1	2	2	1	2	2
2650	533	1	35	1	1	5	2	1	1	5	1	1	2	2	1	2	2	1	1	1	1	1	1	1	1	1	1	1
2661	518	1	30	2	2	4	1	1	1	6	2	2	1	1	0	2	1	1	1	1	1	1	1	1	1	1	1	1
2662	480	1	26	2	2	4	1	1	1	6	1	2	1	2	0	2	2	1	1	1	1	1	1	1	1	1	1	1
2666	202	3	30	2	2	4	1	1	1	5	1	2	1	2	0	2	2	1	1	1	1	2	1	1	2	1	1	2
2671	300	2	35	1	4	2	1	1	1	6	2	2	1	2	0	2	2	1	1	1	1	1	1	1	1	1	1	1
2672	649	1	25	2	1	5	1	1	1	5	1	2	1	1	0	2	1	1	1	1	1	1	1	1	1	1	1	1
2675	104	3	25	2	1	5	1	2	2	5	1	2	1	2	0	2	1	1	1	1	2	2	1	2	2	1	2	2
2676	224	3	24	3	1	5	1	1	1	5	2	1	2	2	1	2	2	1	1	1	1	1	1	1	1	1	1	1
2677	544	1	28	2	2	4	1	2	1	5	1	2	1	2	0	2	2	1	1	1	1	1	1	1	1	1	1	1
2678	318	2	35	1	7	1	1	2	1	5	2	2	2	2	0	2	2	1	1	1	1	1	1	1	1	1	1	1
2688	345	2	32	2	3	3	1	2	1	5	1	2	1	2	0	2	1	1	1	1	1	1	1	1	1	1	1	1
2692	314	2	30	2	3	3	1	1	1	5	1	2	1	1	0	2	2	1	1	1	1	1	1	1	1	1	1	1
2693	557	1	33	2	3	3	1	1	1	5	1	2	1	2	0	2	1	1	1	1	1	1	1	1	1	1	1	1
2695	206	3	19	3	1	5	1	1	1	5	2	2	2	2	0	2	1	1	1	1	1	1	1	1	1	1	1	1
2696	612	1	25	2	1	5	1	2	1	5	1	2	2	2	0	2	1	1	1	1	1	1	1	1	1	1	1	1
2681	338	2	26	2	4	2	1	2	1	5	2	2	1	2	0	3	3	1	1	1	1	1	1	1	1	1	1	1
2683	93	4	32	2	4	2	1	3	3	5	1	2	1	1	0	2	1	1	1	1	1	2	1	1	2	1	1	1
2699	295	2	29	2	2	4	1	1	1	5	1	2	1	2	0	2	1	1	1	1	1	1	1	1	1	1	1	1
2702	311	2	29	2	1	5	1	1	1	5	2	2	2	2	0	2	1	1	1	1	1	1	1	1	1	1	1	1
2706	206	3	30	2	3	3	1	1	2	5	1	2	1	1	0	2	2	1	1	1	1	1	1	1	1	1	1	1
2708	331	2	22	3	1	5	1	1	3	5	2	2	1	2	0	2	3	1	1	1	2	2	1	2	2	1	2	2
2710	332	2	24	3	2	4	1	3	3	5	1	2	1	2	0	2	2	1	1	1	1	1	1	1	1	1	1	1
2715	523	1	24	3	1	5	1	1	1	5	1	2	1	1	0	2	2	1	1	1	1	1	1	1	1	1	1	1
2720	385	1	30	2	1	5	1	1	3	5	1	2	1	2	0	2	2	1	1	1	1	1	1	1	1	1	1	1
2752	464	1	20	3	1	5	1	2	3	5	2	2	2	1	0	2	2	1	1	1	1	1	1	1	1	1	1	1
2753	544	1	33	2	2	4	1	1	1	5	2	1	2	1	0	2	2	1	1	1	1	1	1	1	1	1	1	1
2755	289	2	31	2	2	4	1	1	1	5	1	2	2	1	0	2	2	1	1	1	1	1	1	1	1	1	1	1
2756	234	3	24	3	1	5	1	2	2	6	2	2	1	1	1	2	1	1	1	1	1	2	1	1	2	1	1	2
2758	190	3	26	2	3	3	1	2	1	5	2	2	2	2	0	2	2	1	1	1	1	1	1	1	1	1	1	1
2759	298	2	21	3	1	5	1	1	1	5	1	2	1	2	0	2	1	1	1	1	1	1	1	1	1	1	1	1
2760	259	3	22	3	1	5	1	3	3	6	2	2	1	2	0	3	3	1	1	1	1	1	1	1	1	1	1	1
2769	347	2	20	3	2	4	1	2	2	7	1	1	2	2	1	3	3	1	1	1	1	1	1	1	1	1	1	1
2770	112	3	22	3	6	1	1	3	3	6	2	2	2	2	0	3	3	1	1	1	2	2	1	2	2	1	2	2
4387	361	2	26	2	2	4	1	1	1	5	2	1	2	1	0	2	2	1	1	1	1	1	1	1	1	1	1	1
4391	182	3	20	3	1	5	1	2	1	6	2	2	2	1	0	2	2	1	1	1	1	1	1	1	1	1	1	1
2801	288	2	34	2	6	1	2	2	3	7	1	1	2	1	0	2	3	1	1	2	2	2	2	2	2	2	2	2
2803	170	3	23	3	2	4	2	1	1	5	2	2	2	1	0	3	3	1	1	1	1	1	1	1	1	1	1	1
2805	291	2	26	2	2	4	2	2	1	6	2	2	1	1	0	3	3	1	1	1	1	1	1	1	1	1	1	1
2806	265	3	19	3	1	5	2	3	3	6	1	2	2	2	0	3	3	2	2	1	1	2	1	1	2	1	1	2
2810	300	2	21	3	2	4	2	3	3	7	1	2	1	2	1	2	2	1	1	1	1	1	1	1	1	1	1	1
2811	714	1	24	3	4	2	2	3	2	7	1	2	1	2	2	3	3	1	1	1	1	1	1	1	1	1	1	1
2816	193	3	20	3	3	3	2	3	1	6	1	2	1	1	1	3	3	1	1	1	1	1	1	1	1	1	1	1
2817	136	3	37	1	5	1	2	2	2	5	1	1	2	1	0	2	2	1	1	1	2	2	2	1	2	1	2	2
2818	518	1	26	2	3	3	2	1	1	5	1	1	2	2	0	2	2	1	1	1	1	1	1	1	1	1	1	1
2819	460	1	27	2	2	4	2	1	1	5	2	2	1	1	0	2	2	1	1	1	1	1	1	1	1	1	1	1
2831	123	3	23	3	2	4	2	2	1	6	2	2	2	1	0	2	2	1	1	1	2	2	1	2	2	1	2	2
2833	119	3	24	3	1	5	2	2	2	6	2	2	2	2	1	2	2	1	1	1	1	2	1	1	2	1	1	2
2834	189	3	19	3	1	5	2	2	3	6	2	2	2	2	0	2	2	1	1	1	1	1	1	1	1	1	1	1
2841	520	1	21	3	1	5	2	1	1	5	1	2	2	2	0	2	1	1	1	1	1	1	1	1	1	1	1	1
2842	560	1	24	3	3	3	2	3	3	7	2	2	2	2	1	2	3	1	1	1	1	1	1	1	1	1	1	1
2843	199	3	31	2	2	4	2	1	3	6	1	2	1	2	0	2	2	1	1	1	1	1	1	1	1	1	1	1
2846	106	3	30	2	6	1	2	3	1	5	1	2	2	1	1	3	3	1	1	1	2	2	1	1	1	1	1	2
2849	414	1	21	3	2	4	2	3	2	6	2	1	2	1	0	3	3	1	1	1	1	1	1	1	1	1	1	1
2850	550	1	29	2	2	4	2	3	1	6	2	2	2	1	0	2	2	1	1	1	2	2	1	1	2	1	1	2
2864	164	3	25	2	3	3	2	3	2	6	1	2	1	1	0	3	3	1	1	1	1	1	1	1	1	1	1	1
2865	77	4	25	2	4	2	2	3	2	7	1	2	2	1	0	2	1	1	1	2	2	2	2	2	2	2	2	2
2867	310	2	20	3	1	5	2	3	1	7	1	2	1	1	0	2	1	1	1	1	1	1	1	1	1	1	1	1
2874	357	2	35	1	5	1	2	1	1	6	1	1	2	2	1	2	1	1	1	1	2	2	1	2	2	1	2	2
2877	212	3	29	2	2	4	2	1	1	5	1	1	2	1	0	2	2	1	1	1	1	1	1	1	1	1	1	1
2882	324	2	20	3	2	4	2	3	3	6	1	1	2	2	0	2	1	1	2	2	2	2	2	2	2	2	2	2
2883	163	3	21	3	1	5	2	3	1	7	1	1	2	1	0	2	1	1	1	1	1	1	1	1	1	1	1	1
2885	123	3	17	3	1	5	2	3	2	6	1	2	1	1	0	2	2	1	1	1	1	2	1	1	2	1	1	2
2901	574	1	29	2	3	3	2	2	1	8	1	2	1	1	2	3	3	1	1	1	1	1	1	1	1	1	1	1
2902	303	2	26	2	1	5	2	1	1	7	1	2	1	1	0	2	1	1	1	1	1	1	1	1	1	1	1	1
2903	133	3	24	3	2	4	2	1	1	7	1	1	2	2	0	2	3	1	1	1	2	2	1	2	2	1	2	2
2904	114	3	28	2	5	1	2	3	1	7	1	1	2	1	0	3	3	1	1	1	1	1	1	1	1	1	1	1
2916	465	1	28	2	2	4	2	2	1	8	2	2	1	2	1	2	1	1	1	1	1	1	1	1	1	1	1	1
2919	74	4	30	2	6	1	2	3	1	7	1	1	2	2	1	3	3	1	1	2	2	2	2	2	2	2	2	2
2972	338	2	39	1	9	1	1	2	3	5	1	2	1	2	0	2	1	1	1	1	1	2	1	1	2	1	1	2
2973	588	1	28	2	3	3	1	2	3	8	1	2	2	2	1	2	2	1	1	1	1	1	1	1	1	1	1	1
2974	625	1	27	2	2	4	1	2	1	7	2	2	1	1	0	2	2	1	1	1	1	1	1	1	1	1	1	1
2975	460	1	25	2	2	4	1	3	2	8	2	2	1	1	1	2	2	1	1	1	1	1	1	1	1	1	1	1
2976	186	3	24	3	1	5	1	2	3	6	1	2	1	1	0	2	2	1	1	1	1	2	1	1	2	1	1	2
2979	251	3	20	3	1	5	1	1	1	6	1	2	1	1	0	2	2	1	1	1	1	1	1	1	1	1	1	1
3001	382	1	23	3	1	5	1	1	1	6	1	2	1	1	0	2	2	1	1	1	1	1	1	1	1	1	1	1
3009	261	3	34	2	5	1	1	2	1	6	2	2	2	2	1	2	2	1	1	1	1	1	1	1	1	1	1	1
3010	17	6	25	2	1	5	1	1	1	5	2	2	2	2	0	2	2	1	1	2	2	2	2	2	2	2	2	1
2991	209	3	29	2	8	1	1	2	1	5	1	2	2	1	0	2	2	1	1	1	1	1	1	1	1	1	1	1
2993	423	1	24	3	3	3	1	2	3	7	1	2	2	2	2	2	2	1	1	1	2	2	1	2	2	1	2	2
2994	483	1	22	3	3	3	1	3	2	5	1	2	1	2	0	2	2	1	1	1	1	1	1	1	1	1	1	1
2996	200	3	28	2	9	1	1	2	3	7	2	2	1	2	0	2	2	1	1	1	1	1	1	1	1	1	1	1
2998	60	5	23	3	3	3	1	3	2	7	2	2	2	2	1	2	2	1	1	1	2	2	1	2	2	1	2	1
2999	566	1	29	2	4	2	1	2	1	6	2	2	2	2	0	2	2	1	1	1	1	1	1	1	1	1	1	1
3016	120	3	29	2	4	2	1	3	2	7	1	2	1	1	1	2	1	1	1	1	1	2	1	1	2	1	1	2
3017	109	3	40	1	5	1	1	1	1	5	2	2	1	1	0	2	2	1	1	1	2	2	1	2	2	1	2	2
3018	239	3	24	3	3	3	1	3	1	5	2	2	1	1	0	2	2	1	1	1	1	1	1	1	1	1	1	1
3019	459	1	23	3	1	5	1	1	1	6	1	1	2	2	2	2	3	1	1	1	2	2	1	2	2	1	2	2
3020	136	3	29	2	3	3	1	1	3	5	2	2	1	2	1	2	2	1	1	1	1	1	1	1	1	1	1	1
3021	243	3	27	2	5	1	2	2	1	5	2	1	2	2	0	2	1	1	1	1	2	2	1	2	2	1	2	2
3022	299	2	21	3	1	5	2	1	1	5	2	2	2	2	2	2	1	1	1	1	1	1	1	1	1	1	1	1
3024	135	3	35	1	5	1	2	3	3	5	2	2	2	2	0	3	3	1	1	1	1	1	1	1	1	1	1	1
2981	361	2	26	2	2	4	1	1	1	5	2	1	2	2	0	2	2	1	1	1	1	1	1	1	1	1	1	1
2982	625	1	32	2	2	4	1	1	1	5	2	1	2	1	1	2	1	1	1	1	1	1	1	1	1	1	1	1
2984	376	1	30	2	3	3	1	1	1	5	2	1	2	1	0	2	2	1	1	1	1	1	1	1	1	1	1	1
2985	287	2	27	2	2	4	1	1	1	5	2	2	2	1	0	2	1	1	1	1	1	1	1	1	1	1	1	1
2962	280	2	38	1	6	1	1	2	1	5	2	2	2	2	0	2	3	1	1	1	1	1	1	1	1	1	1	1
2963	158	3	27	2	3	3	1	1	1	5	2	2	2	1	1	2	2	1	1	1	1	2	1	1	2	1	1	2
2968	21	6	31	2	3	3	1	1	1	5	2	2	2	2	0	2	2	1	1	1	2	2	1	2	2	1	2	1
2951	272	2	21	3	1	5	1	1	1	5	1	2	2	1	0	2	2	1	1	1	1	1	1	1	1	1	1	1
2953	567	1	34	2	4	2	1	3	1	7	2	2	2	1	1	2	2	1	1	1	1	1	1	1	1	1	1	1
2955	378	1	22	3	1	5	1	2	2	6	1	2	1	2	0	2	3	1	1	1	1	1	1	1	1	1	1	1
2958	300	2	31	2	4	2	1	1	3	6	1	2	1	1	0	2	2	1	1	1	1	1	1	1	1	1	1	1
2959	392	1	28	2	3	3	1	1	1	5	1	2	1	1	0	2	2	1	1	1	1	1	1	1	1	1	1	1
2933	615	1	32	2	5	1	1	1	1	6	1	2	1	2	0	2	2	1	1	1	1	1	1	1	1	1	1	1
2936	589	1	32	2	6	1	1	3	3	8	1	2	1	1	0	2	1	1	1	1	1	2	1	1	2	1	1	2
2939	690	1	21	3	2	4	1	2	2	7	1	2	1	1	1	2	1	1	1	1	1	1	1	1	1	1	1	1
2940	140	3	31	2	4	2	1	2	1	6	1	2	1	1	0	2	1	1	1	1	1	2	1	1	2	1	1	2
2941	518	1	17	3	1	5	1	2	1	5	2	2	2	2	0	2	2	1	1	1	1	1	1	1	1	1	1	1
2943	288	2	21	3	2	4	1	3	1	6	2	2	1	2	0	2	2	1	1	1	1	1	1	1	1	1	1	1
2944	63	5	23	3	2	4	1	1	1	5	2	2	1	2	0	2	2	1	1	1	2	2	1	2	2	1	2	1
2945	215	3	25	2	1	5	1	3	1	5	2	2	1	2	1	3	3	1	1	1	1	1	1	1	1	1	1	1
2946	401	1	32	2	4	2	1	2	1	6	1	2	1	1	2	3	3	1	1	1	1	1	1	1	1	1	1	1
2948	192	3	21	3	1	5	1	1	1	5	1	2	1	1	0	2	2	1	1	1	1	1	1	1	1	1	1	1
2950	541	1	21	3	2	4	1	2	1	5	1	2	1	1	0	2	2	1	1	1	1	1	1	1	1	1	1	1
3055	72	4	27	2	6	1	2	2	1	5	2	2	2	2	0	3	3	1	1	1	2	2	1	2	2	1	2	2
3056	195	3	29	2	1	5	2	3	3	7	2	2	1	1	2	3	3	1	1	1	1	2	1	2	2	1	2	2
3063	476	1	20	3	2	4	2	1	1	6	1	2	1	1	0	2	2	1	1	1	1	1	1	1	1	1	1	1
3064	29	6	29	2	6	1	2	3	3	7	1	2	1	1	0	2	2	1	1	2	2	2	2	2	2	2	2	1
3065	341	2	32	2	6	1	2	3	2	5	1	1	2	2	0	2	2	1	1	1	1	1	1	1	1	1	1	1
3067	46	5	20	3	1	5	2	2	1	6	2	1	2	1	0	2	2	1	1	1	2	2	1	2	2	1	2	1
3068	374	1	27	2	5	1	2	1	1	5	1	2	1	1	0	3	3	1	1	1	1	1	1	1	1	1	1	1
3070	274	2	23	3	1	5	2	1	1	5	1	2	1	1	0	2	2	1	1	1	1	1	1	1	1	1	1	1
3101	659	1	30	2	2	4	2	1	1	5	1	2	1	2	0	2	2	1	1	1	1	1	1	1	1	1	1	1
3102	222	3	27	2	4	2	2	1	1	5	2	2	2	1	0	2	2	1	1	1	1	1	1	1	1	1	1	1
3109	122	3	29	2	5	1	2	3	1	5	2	2	2	2	0	2	1	1	1	1	1	1	1	1	1	1	1	1
3112	325	2	19	3	1	5	2	2	1	5	1	2	1	2	0	2	2	1	1	1	1	1	1	1	1	1	1	1
3113	288	2	26	2	2	4	2	3	1	7	1	2	1	2	1	2	2	1	1	1	1	1	1	1	1	1	1	1
3114	658	1	25	2	1	5	2	1	1	5	1	2	1	2	0	2	2	1	1	1	1	1	1	1	1	1	1	1
3115	512	1	29	2	5	1	2	3	3	5	1	2	2	2	2	2	1	1	1	1	1	1	1	1	1	1	1	1
3116	225	3	28	2	4	2	2	1	1	6	2	2	2	2	0	2	2	1	1	1	1	1	1	1	1	1	1	1
3119	281	2	29	2	2	4	2	1	1	6	2	2	2	1	0	2	2	1	1	1	1	1	1	1	1	1	1	1
3122	228	3	30	2	4	2	2	3	3	6	1	2	1	1	2	2	2	1	1	1	1	2	1	1	2	1	1	2
3125	608	1	27	2	1	5	2	1	1	6	1	2	1	1	0	2	2	1	1	1	1	1	1	1	1	1	1	1
3130	337	2	31	2	3	3	2	1	1	5	1	2	1	1	0	2	2	1	1	1	1	1	1	1	1	1	1	1
3152	707	1	29	2	2	4	2	3	1	6	1	2	1	1	1	3	3	1	2	1	1	1	1	1	1	1	1	2
3156	376	1	32	2	3	3	1	2	3	5	1	2	1	1	0	2	1	1	1	1	1	1	1	1	1	1	1	1
3157	231	3	29	2	3	3	1	1	1	5	1	2	1	1	1	2	2	1	1	1	1	1	1	1	1	1	1	1
3158	360	2	23	3	3	3	1	2	1	6	1	2	1	1	0	2	2	1	2	1	1	1	1	1	1	1	1	2
3161	433	1	25	2	4	2	2	3	3	6	1	2	1	2	1	2	1	1	1	1	1	1	1	1	1	1	1	1
3168	189	3	30	2	4	2	2	3	2	5	1	2	2	1	1	2	1	1	1	1	1	1	1	1	1	1	1	1
3174	329	2	30	2	1	5	1	1	1	5	1	2	1	1	0	2	2	1	1	1	1	1	1	1	1	1	1	1
3175	684	1	30	2	2	4	2	2	1	5	1	2	1	1	0	2	2	1	1	1	1	1	1	1	1	1	1	1
3177	104	3	30	2	2	4	2	1	1	5	1	2	1	1	0	2	2	1	1	1	1	2	1	1	2	1	1	2
3178	156	3	23	3	1	5	2	1	2	5	1	2	1	1	0	2	2	1	1	1	1	1	1	1	1	1	1	1
3179	690	1	28	2	3	3	2	3	2	5	1	2	1	1	2	2	2	1	2	1	1	1	1	1	1	2	2	2
3180	405	1	25	2	2	4	2	2	2	6	1	2	1	1	1	2	1	1	1	1	1	1	1	1	1	1	1	1
3181	27	6	20	3	2	4	1	1	1	6	1	2	1	2	2	2	2	1	1	2	2	2	2	2	2	2	2	1
3202	335	2	25	2	3	3	2	1	1	5	1	1	2	1	0	2	2	1	1	1	1	1	1	1	1	1	1	1
3204	299	2	25	2	1	5	2	1	1	6	1	2	1	2	0	2	2	1	1	1	1	1	1	1	1	1	1	1
3205	749	1	23	3	1	5	2	1	3	5	1	1	2	2	1	2	2	1	2	1	1	1	2	2	2	2	2	2
3206	658	1	30	2	3	3	1	3	1	6	1	2	1	1	0	2	2	1	1	1	1	1	1	1	1	1	1	1
3209	113	3	28	2	2	4	1	1	1	5	1	2	1	1	0	2	2	1	1	1	1	1	1	1	1	1	1	1
3210	483	1	25	2	3	3	1	1	1	5	1	2	1	1	0	2	2	1	1	1	1	1	1	1	1	1	1	1
3211	488	1	21	3	2	4	2	1	3	7	1	2	1	2	2	2	2	1	1	1	1	1	1	1	1	2	2	2
3213	176	3	30	2	4	2	2	1	3	6	1	2	2	1	0	2	2	1	1	1	1	1	1	1	1	1	1	1
3214	629	1	35	1	8	1	2	3	2	7	1	2	1	2	2	2	2	1	1	1	1	1	1	1	1	1	1	1
3219	286	2	35	1	1	5	2	1	1	6	1	1	2	1	0	2	2	1	1	1	1	1	1	1	1	2	2	2
3242	318	2	19	3	1	5	2	1	1	5	1	2	1	2	0	2	2	1	1	1	1	1	1	1	1	1	1	1
3245	266	3	17	3	1	5	2	2	2	6	2	2	2	2	2	2	2	1	1	1	1	2	1	1	2	1	1	2
3248	335	2	35	1	10	1	2	2	1	7	1	2	1	2	2	2	2	1	1	1	1	1	1	1	1	1	1	1
3249	285	2	28	2	6	1	2	2	1	5	1	2	1	2	2	2	2	1	1	1	1	1	1	1	1	1	1	1
3252	114	3	24	3	1	5	2	2	1	6	2	2	1	1	2	3	3	1	1	1	2	2	1	2	2	1	2	2
3254	164	3	25	2	2	4	1	2	2	6	2	2	1	2	2	2	2	1	1	1	1	2	1	1	2	1	1	2
3256	557	1	29	2	1	5	2	2	1	5	2	2	1	2	2	2	2	1	1	1	1	1	1	1	1	1	1	1
3257	155	3	23	3	1	5	2	1	1	5	1	2	1	2	0	2	2	1	1	1	1	2	1	1	2	1	1	2
3272	289	2	19	3	2	4	2	1	1	6	2	1	2	2	0	2	2	1	1	1	1	1	1	1	1	1	1	1
3275	524	1	29	2	4	2	2	2	1	6	2	1	2	2	0	3	3	1	1	1	1	1	1	1	1	1	1	1
3277	225	3	19	3	2	4	2	2	1	7	2	2	1	2	1	2	1	1	1	1	1	1	1	1	1	1	1	1
3281	113	3	26	2	3	3	2	1	1	6	2	2	1	2	2	3	3	1	1	2	2	2	2	2	2	2	2	2
3282	356	2	20	3	1	5	2	2	1	6	2	2	1	1	2	3	3	1	1	1	1	1	1	1	1	1	1	1
3283	220	3	18	3	2	4	2	2	1	6	1	2	1	2	0	3	3	1	1	1	1	1	1	1	1	1	1	1
3284	283	2	40	1	6	1	2	2	1	6	2	2	1	2	0	3	3	1	1	1	1	1	1	1	1	1	1	1
3285	339	2	35	1	6	1	2	3	3	7	2	2	1	2	0	2	1	1	1	1	1	1	1	1	1	1	1	1
3286	155	3	20	3	3	3	2	2	1	5	2	2	1	1	0	3	3	1	1	1	1	1	1	1	1	1	1	1
3287	178	3	22	3	2	4	2	1	1	5	1	2	1	2	0	2	2	1	1	1	1	1	1	1	1	1	1	1
3288	304	2	26	2	5	1	2	2	2	6	1	2	1	1	0	3	3	1	1	1	1	1	1	1	1	1	1	1
3289	361	2	21	3	2	4	2	1	1	6	1	2	1	1	0	2	2	1	1	1	1	1	1	1	1	1	1	1
3303	153	3	21	3	1	5	2	3	3	7	2	2	2	2	0	3	3	1	1	1	1	1	1	1	1	1	1	1
3306	588	1	19	3	1	5	2	2	1	5	2	2	1	1	0	2	2	1	1	1	1	1	1	1	1	1	1	1
3311	170	3	24	3	6	1	2	2	3	6	1	1	2	2	0	3	3	1	1	1	1	1	1	1	1	1	1	1
3312	440	1	20	3	3	3	2	2	2	6	1	2	1	1	0	2	2	1	1	1	1	1	1	1	1	1	1	1
3313	18	6	25	2	1	5	2	2	1	7	2	2	1	1	0	2	2	1	1	2	2	2	2	2	2	2	2	1
3316	18	6	34	2	5	1	2	3	1	7	2	1	2	2	0	2	2	1	1	2	2	2	2	2	2	2	2	1
3317	259	3	21	3	1	5	2	1	1	6	2	2	2	2	0	2	2	1	1	1	1	1	1	1	1	1	1	1
3322	239	3	23	3	2	4	2	3	3	7	2	2	2	2	2	2	2	1	1	2	2	2	2	2	2	2	2	2
3323	106	3	26	2	5	1	2	3	1	7	2	2	2	1	0	2	2	1	1	1	1	1	1	1	1	1	1	1
3324	78	4	32	2	7	1	2	3	2	7	2	2	2	1	2	2	1	1	1	1	1	2	1	1	2	1	1	1
3325	295	2	24	3	2	4	2	3	1	7	1	2	2	1	2	2	1	1	1	1	1	1	1	1	1	1	1	1
3354	473	1	24	3	1	5	2	1	1	6	2	2	1	2	0	2	2	1	1	1	1	1	1	1	1	1	1	1
3361	138	3	26	2	3	3	2	2	1	7	2	2	2	2	0	3	3	1	1	1	1	2	1	1	2	1	1	2
3363	59	5	27	2	3	3	2	1	1	5	1	2	1	1	1	2	2	1	1	1	2	2	1	2	2	1	2	1
3364	107	3	21	3	1	5	2	1	1	5	2	2	1	1	0	2	2	1	1	1	1	2	1	1	2	1	1	2
3366	205	3	21	3	2	4	2	2	2	7	2	2	1	2	1	3	3	1	1	1	1	1	1	1	1	1	1	1
3367	148	3	39	1	7	1	2	3	3	8	2	2	1	2	2	2	2	1	1	1	1	1	1	1	1	1	1	1
3369	219	3	29	2	6	1	2	3	3	8	2	2	1	2	0	2	2	1	1	1	1	1	1	1	1	1	1	1
3370	716	1	39	1	10	1	2	3	3	7	2	2	1	2	2	2	2	1	1	1	1	1	1	1	1	1	1	1
3379	53	5	38	1	2	4	2	3	2	8	2	2	2	2	2	2	1	1	2	2	2	2	2	2	2	2	2	2
3404	397	1	35	1	5	1	2	3	1	6	1	2	1	1	0	3	3	1	1	2	2	2	2	2	2	2	2	2
3405	285	2	34	2	3	3	2	2	1	5	2	2	1	2	0	2	2	1	1	1	1	1	1	1	1	1	1	1
3412	635	1	21	3	1	5	2	2	1	5	2	2	2	2	0	3	3	1	1	1	1	1	1	1	1	1	1	1
3413	179	3	24	3	2	4	2	3	1	5	2	2	2	2	1	3	3	1	1	1	1	2	2	2	2	2	2	2
3426	165	3	23	3	4	2	2	3	1	6	2	2	2	1	2	3	3	1	1	1	1	2	1	1	2	1	1	2
3427	438	1	23	3	2	4	2	3	3	8	2	2	2	2	0	2	2	1	1	1	1	1	1	1	1	2	2	2
3452	589	1	36	1	3	3	2	3	3	8	2	2	1	2	0	3	3	1	1	1	1	1	1	1	1	1	1	1
3457	161	3	31	2	4	2	2	2	1	7	2	1	2	1	0	2	2	1	1	1	1	1	2	2	2	2	2	2
3458	438	1	26	2	4	2	2	3	2	7	2	2	1	1	1	3	3	1	1	1	1	1	1	1	1	1	1	1
3459	131	3	33	2	8	1	2	3	3	7	2	2	2	2	2	3	3	1	1	1	1	1	1	1	1	1	1	1
3460	199	3	24	3	4	2	2	2	1	7	2	2	1	1	2	3	3	1	1	1	1	1	1	1	1	1	1	1
3502	171	3	28	2	2	4	2	1	1	5	1	1	2	1	0	2	2	1	1	1	1	1	1	1	1	1	1	1
3503	475	1	25	2	3	3	2	1	2	5	1	2	1	2	0	2	1	1	1	1	1	1	1	1	1	1	1	1
3507	541	1	19	3	1	5	2	3	2	8	2	2	1	2	1	3	3	1	1	1	1	1	1	1	1	1	1	1
3511	245	3	21	3	1	5	2	1	1	5	2	2	1	2	0	2	2	1	1	2	2	2	2	2	2	2	2	2
3512	169	3	22	3	2	4	2	1	1	6	1	1	2	1	0	2	2	1	1	1	1	1	1	1	1	1	1	1
3521	144	3	28	2	2	4	2	3	1	7	1	2	1	2	0	2	2	1	1	1	1	1	1	1	1	1	1	1
3522	85	4	22	3	2	4	2	2	2	7	2	2	1	2	0	2	2	1	1	2	2	2	2	2	2	2	2	2
3528	320	2	23	3	2	4	2	3	2	7	1	1	2	1	0	2	2	1	1	1	1	2	1	1	2	1	1	2
3531	197	3	30	2	3	3	2	1	1	6	1	1	2	1	1	2	2	1	1	1	1	1	1	1	1	1	1	1
3532	334	2	35	1	6	1	2	1	1	7	1	2	1	2	0	2	2	1	1	1	1	1	1	1	1	1	1	1
3554	540	1	28	2	4	2	2	1	1	6	1	2	1	2	2	2	1	1	1	1	1	1	1	1	1	2	2	2
3556	546	1	40	1	3	3	2	1	3	5	1	1	2	1	0	2	2	1	1	1	1	1	1	1	1	2	2	2
3557	105	3	22	3	3	3	2	1	1	6	1	2	1	1	1	2	2	2	2	2	2	2	2	2	2	2	2	2
3562	167	3	30	2	4	2	2	1	1	6	2	2	1	1	0	2	2	1	1	1	1	2	1	1	2	1	1	2
3576	142	3	24	3	2	4	2	2	1	6	1	2	1	2	0	3	3	1	2	1	1	2	1	1	2	1	1	2
3579	428	1	25	2	3	3	2	1	1	6	1	2	1	1	0	2	2	1	2	1	1	1	1	1	1	1	1	2
3604	433	1	26	2	1	5	2	1	1	6	1	2	1	2	1	2	2	1	1	1	1	2	1	1	2	1	1	2
3605	520	1	29	2	6	1	2	3	1	6	1	1	2	1	0	2	2	1	1	1	1	1	1	1	1	1	1	1
3606	585	1	25	2	1	5	2	1	1	6	2	2	1	1	0	2	2	1	1	1	1	1	1	1	1	1	1	1
3607	196	3	29	2	5	1	2	1	1	7	1	2	1	2	2	2	2	1	1	1	1	1	1	1	1	1	1	1
3609	112	3	27	2	2	4	2	1	1	5	1	2	1	2	0	2	2	1	1	1	1	1	1	1	1	1	1	1
3611	272	2	22	3	1	5	2	1	1	5	1	2	1	1	0	2	1	1	1	1	1	1	1	1	1	1	1	1
3616	414	1	25	2	3	3	2	3	1	7	1	2	1	2	0	2	2	1	2	1	1	1	1	1	1	1	1	2
3620	244	3	33	2	2	4	2	3	3	7	1	2	1	1	0	2	3	1	2	1	1	1	1	1	1	1	1	2
3621	243	3	34	2	5	1	2	2	2	7	1	2	1	2	0	2	2	1	1	1	1	1	1	1	1	1	1	1
3623	197	3	34	2	3	3	2	2	2	7	1	2	1	2	0	2	2	1	2	1	1	1	1	1	1	1	1	2
3625	110	3	28	2	5	1	2	3	3	9	2	2	1	2	0	3	3	1	2	2	2	2	2	2	2	2	2	2
3627	451	1	28	2	3	3	2	1	3	5	1	2	2	2	0	2	2	1	1	1	1	1	1	1	1	1	1	1
3628	398	1	38	1	5	1	2	1	2	5	1	2	2	2	2	2	1	1	1	1	1	1	1	1	1	1	1	1
3658	70	4	33	2	7	1	2	2	1	5	2	2	2	2	0	3	3	1	1	2	2	2	2	2	2	2	2	2
3659	602	1	26	2	4	2	2	3	1	6	2	2	2	2	2	3	3	1	1	1	1	1	1	1	1	1	1	1
3663	544	1	21	3	1	5	2	2	2	5	1	2	1	2	0	3	3	1	1	1	1	1	1	1	1	1	1	1
3664	135	3	28	2	4	2	2	3	2	6	2	2	2	2	0	2	1	1	1	2	2	2	2	2	2	2	2	2
3667	174	3	17	3	1	5	2	3	2	6	2	2	2	2	2	2	2	1	1	1	1	1	1	1	1	1	1	1
3681	471	1	32	2	5	1	2	2	2	7	1	1	2	1	0	2	2	1	1	1	1	1	1	1	1	1	1	1
3684	231	3	32	2	5	1	2	3	1	7	1	2	1	1	1	2	2	1	1	1	1	1	1	1	1	1	1	1
3685	150	3	24	3	2	4	2	3	2	8	2	2	1	2	0	3	3	1	1	1	1	1	1	1	1	1	1	1
3686	170	3	19	3	1	5	2	3	3	7	2	2	2	2	2	3	3	1	1	1	1	2	1	1	2	1	1	2
3687	158	3	26	2	3	3	2	2	3	7	2	2	1	1	0	3	3	1	1	1	1	1	1	1	1	1	1	1
3689	147	3	35	1	7	1	2	2	1	7	1	2	1	1	1	2	2	1	1	1	1	2	1	1	2	1	1	2
3690	352	2	28	2	2	4	2	3	3	7	2	2	2	1	2	2	2	1	1	1	1	1	1	1	1	1	1	1
3692	296	2	29	2	2	4	2	2	1	5	2	2	1	2	2	2	2	1	1	1	1	1	1	1	1	1	1	1
3695	652	1	24	3	2	4	2	2	1	6	2	2	1	2	0	3	3	1	1	1	1	1	1	1	1	1	1	1
3713	387	1	22	3	1	5	2	2	1	6	2	2	1	1	1	3	3	1	1	1	1	1	1	1	1	1	1	1
3722	237	3	26	2	3	3	2	1	3	7	1	2	1	1	0	2	3	1	1	1	1	1	1	1	1	1	1	1
3723	49	5	21	3	1	5	2	3	1	6	2	2	1	2	0	2	2	1	1	2	2	2	2	2	2	2	2	2
3726	507	1	28	2	2	4	2	1	1	5	1	2	2	1	0	2	2	1	1	1	1	1	1	1	1	1	1	1
3745	266	3	34	2	5	1	2	3	3	8	2	2	2	2	0	3	3	1	1	2	2	2	2	2	2	2	2	2
3747	210	3	19	3	1	5	2	3	1	5	1	2	1	1	0	2	2	1	1	1	1	1	1	1	1	1	1	1
3761	467	1	24	3	3	3	2	3	1	6	1	2	1	1	0	2	2	1	1	1	1	1	1	1	1	1	1	1
3764	261	3	33	2	6	1	2	3	1	8	2	2	1	2	2	3	3	1	1	1	2	2	1	2	2	1	2	2
3765	150	3	34	2	4	2	1	3	3	6	2	2	1	1	2	3	3	1	1	1	1	2	1	1	2	1	1	2
3766	318	2	30	2	1	5	2	1	1	5	1	2	1	1	1	3	3	1	1	1	1	1	1	1	1	1	1	1
3769	361	2	24	3	4	2	2	3	1	5	2	2	1	1	0	3	3	1	1	1	1	1	1	1	1	1	1	1
3775	234	3	19	3	2	4	2	3	3	6	1	2	1	2	1	2	2	1	1	1	2	2	1	2	2	1	2	2
3776	252	3	24	3	1	5	2	2	2	6	2	2	2	2	0	2	2	1	1	1	1	1	1	1	1	1	1	1
3777	325	2	30	2	3	3	2	1	2	5	1	2	2	2	0	2	1	1	1	1	1	1	1	1	1	1	1	1
3779	62	5	30	2	3	3	2	1	1	6	2	2	2	2	0	2	2	1	1	1	2	2	1	2	2	1	2	1
3782	130	3	30	2	1	5	2	3	3	7	1	2	1	2	2	2	2	1	1	2	2	2	2	2	2	2	2	2
3803	484	1	29	2	5	1	2	3	1	6	2	2	1	2	0	3	3	1	1	1	1	1	1	1	1	1	1	1
3806	536	1	27	2	4	2	1	2	1	6	1	2	1	1	0	2	2	1	1	1	1	1	1	1	1	1	1	1
3809	502	1	31	2	2	4	2	1	1	5	1	2	1	1	0	2	2	1	1	1	1	1	1	1	1	1	1	1
3811	336	2	24	3	3	3	2	3	1	7	2	2	2	1	2	3	3	1	1	1	2	2	1	2	2	1	2	2
3812	257	3	25	2	1	5	2	2	1	7	2	2	2	2	2	2	2	1	1	1	1	1	1	1	1	1	1	1
3813	384	1	21	3	2	4	2	1	1	6	2	2	2	2	2	2	2	1	1	1	1	1	1	1	1	1	1	1
3814	256	3	29	2	4	2	2	3	1	8	1	2	2	1	0	3	3	1	1	1	1	1	1	1	1	1	1	1
3815	629	1	34	2	2	4	2	2	1	7	2	2	2	2	0	2	2	1	1	1	1	1	1	1	1	1	1	1
3825	687	1	27	2	1	5	2	1	1	6	1	1	2	2	0	2	2	1	1	1	1	1	1	1	1	1	1	1
3831	109	3	27	2	4	2	2	3	2	7	2	2	2	2	2	3	3	1	1	2	2	2	2	2	2	2	2	2
3834	203	3	21	3	2	4	2	3	3	7	2	2	2	2	0	2	2	1	1	1	1	1	1	1	1	1	1	1
3836	619	1	22	3	1	5	2	3	3	5	2	2	2	2	0	2	2	1	1	1	2	2	1	2	2	1	2	2
3840	617	1	31	2	2	4	2	3	1	5	2	1	2	2	0	2	2	1	1	1	1	1	1	1	1	1	1	1
3846	168	3	29	2	4	2	2	1	1	5	1	2	1	1	0	2	2	1	1	1	1	1	1	1	1	1	1	1
3848	117	3	26	2	4	2	2	2	3	5	1	2	1	1	2	2	2	1	1	1	2	2	1	2	2	1	2	2
3903	29	6	21	3	2	4	2	3	1	7	2	1	2	1	2	1	3	1	1	2	2	2	2	2	2	2	2	1
3907	275	2	24	3	7	1	2	3	1	7	1	2	1	1	0	3	3	1	1	1	1	1	1	1	1	1	1	1
3931	144	3	39	1	8	1	2	2	1	7	1	2	2	1	2	2	3	1	1	1	1	1	1	1	1	1	1	1
3932	351	2	33	2	5	1	2	3	1	5	1	2	2	1	1	2	2	1	1	1	1	1	1	1	1	1	1	1
3940	501	1	19	3	1	5	1	3	2	7	1	2	1	2	0	2	2	1	1	1	1	1	1	1	1	1	1	1
3948	692	1	40	1	5	1	2	1	1	5	1	2	1	1	0	2	1	1	1	2	2	2	2	2	2	2	2	2
3952	253	3	26	2	1	5	2	2	1	5	2	2	2	2	0	2	1	1	1	1	1	1	1	1	1	1	1	1
3966	659	1	21	3	2	4	2	1	2	6	1	1	2	1	0	2	2	1	1	1	1	1	1	1	1	1	1	1
3969	245	3	23	3	1	5	2	1	3	7	1	2	1	2	0	2	2	1	1	1	1	1	1	1	1	1	1	1
3972	290	2	25	2	2	4	2	3	1	6	1	2	1	1	2	2	1	1	1	1	1	1	1	1	1	1	1	1
3976	369	1	22	3	1	5	2	1	1	5	1	2	1	1	0	2	2	1	1	2	2	2	2	2	2	2	2	2
3977	625	1	35	1	3	3	2	3	1	6	1	2	1	2	0	2	1	1	1	1	1	1	1	1	1	1	1	1
4017	271	3	28	2	1	5	2	1	1	5	1	2	1	2	0	2	2	1	1	1	1	1	1	1	1	1	1	1
4018	507	1	30	2	4	2	2	1	2	5	1	2	1	1	0	2	2	1	1	1	1	1	1	1	1	1	1	1
4019	179	3	25	2	1	5	2	1	1	5	1	2	1	2	0	2	2	1	1	1	1	1	1	1	1	1	1	1
4022	208	3	28	2	2	4	1	1	1	6	1	2	1	1	0	2	2	1	1	1	1	1	1	1	1	1	1	1
4023	49	5	32	2	2	4	1	2	1	5	1	2	1	1	0	2	1	1	1	1	2	2	1	2	2	1	2	1
4026	621	1	34	2	5	1	2	2	1	5	1	2	1	1	0	2	2	1	1	1	1	1	1	1	1	1	1	1
4028	263	3	30	2	5	1	2	2	2	6	1	2	1	2	0	2	2	1	1	1	1	1	1	1	1	1	1	1
4030	160	3	35	1	2	4	2	1	1	6	1	2	1	2	0	2	2	1	1	1	1	1	1	1	1	1	1	1
4032	474	1	30	2	6	1	2	2	2	6	1	2	1	2	0	2	1	1	1	1	1	1	1	1	1	1	1	1
4033	201	3	24	3	2	4	2	2	1	5	1	2	1	2	0	2	1	1	1	1	1	1	1	1	1	1	1	1
4034	39	6	46	1	7	1	2	3	2	6	1	2	2	2	0	2	1	1	1	2	2	2	2	2	2	2	2	1
4036	615	1	26	2	3	3	2	3	1	7	1	2	1	2	0	2	1	1	1	1	1	1	1	1	1	1	1	1
4038	369	1	26	2	3	3	2	1	1	5	1	2	1	1	0	2	2	1	1	1	1	1	1	1	1	1	1	1
4039	496	1	22	3	1	5	2	1	1	5	1	2	1	1	0	2	2	1	1	1	2	2	1	2	2	1	2	2
4041	110	3	25	2	2	4	2	2	2	7	1	2	1	1	0	2	2	1	1	2	2	2	2	2	2	2	2	2
4043	521	1	25	2	1	5	2	3	2	6	2	2	1	2	0	2	2	1	1	1	1	1	1	1	1	1	1	1
4045	263	3	19	3	2	4	2	3	3	6	2	2	1	2	1	2	2	1	1	1	1	1	1	1	1	1	1	1
4051	205	3	24	3	3	3	2	3	2	6	1	2	1	2	2	2	2	1	1	1	2	2	1	2	2	1	2	2
4056	152	3	19	3	3	3	2	3	1	6	1	2	1	2	0	2	2	1	1	1	1	1	1	1	1	1	1	1
4059	451	1	29	2	3	3	2	2	1	5	1	2	1	2	0	2	1	1	1	1	1	1	1	1	1	1	1	1
4060	261	3	30	2	2	4	2	2	1	5	1	2	1	2	0	2	2	1	1	1	1	1	1	1	1	1	1	1
4061	410	1	25	2	3	3	1	3	3	7	1	2	1	2	0	2	2	1	1	1	1	1	1	1	1	1	1	1
4064	390	1	25	2	3	3	2	2	2	6	1	1	2	1	2	2	2	1	1	1	1	1	1	1	1	1	1	1
4065	172	3	25	2	3	3	2	3	3	6	1	1	2	2	2	2	1	1	1	1	2	2	1	2	2	1	2	2
4002	454	1	24	3	1	5	2	2	2	7	1	2	1	2	0	2	2	1	1	1	1	1	1	1	1	1	1	1
4075	403	1	23	3	2	4	2	1	1	6	1	2	1	1	0	3	3	1	1	2	2	2	2	2	2	2	2	2
4082	57	5	21	3	1	5	1	1	1	6	1	2	1	2	0	2	2	1	1	1	2	2	1	2	2	1	2	1
4083	222	3	25	2	2	4	2	3	1	5	1	1	2	2	2	2	1	1	1	1	1	1	1	1	1	1	1	1
4084	728	1	29	2	3	3	2	2	1	5	2	2	1	2	0	2	2	1	1	1	1	1	1	1	1	1	1	1
4086	434	1	42	1	3	3	2	3	3	6	2	2	1	2	0	2	2	1	1	1	1	1	1	1	1	1	1	1
4090	35	6	25	2	2	4	2	1	3	6	2	2	1	1	2	2	3	1	1	2	2	2	2	2	2	2	2	1
4091	532	1	20	3	1	5	2	3	1	6	1	2	2	2	0	3	3	1	1	1	1	1	1	1	1	1	1	1
4093	214	3	25	2	1	5	2	2	2	6	2	2	1	2	1	2	2	1	1	1	1	1	1	1	1	1	1	1
4097	343	2	38	1	6	1	2	3	1	6	1	2	1	2	0	2	2	1	1	1	1	1	1	1	1	1	1	1
4099	343	2	22	3	1	5	2	1	2	6	1	2	1	2	0	2	2	1	1	1	1	1	1	1	1	1	1	1
4101	347	2	21	3	1	5	2	2	2	6	1	2	1	2	1	2	2	1	1	1	1	1	1	1	1	1	1	1
4103	560	1	28	2	3	3	2	2	1	6	1	2	1	2	0	2	3	1	1	1	1	1	1	1	1	1	1	1
4104	126	3	25	2	3	3	2	2	1	6	1	2	1	2	1	2	2	1	1	1	1	1	1	1	1	1	1	1
4110	213	3	39	1	5	1	2	3	2	6	1	2	1	1	0	2	2	1	1	1	2	2	1	2	2	1	2	2
4112	364	2	25	2	3	3	2	1	1	5	1	2	1	1	0	3	3	1	1	1	1	1	1	1	1	1	1	1
4113	97	4	28	2	2	4	2	1	1	5	1	2	1	1	0	2	2	1	1	1	2	2	1	2	2	1	2	2
4114	490	1	27	2	2	4	2	1	1	5	1	2	1	1	0	2	2	1	1	1	1	2	1	1	2	1	1	2
4132	90	4	19	3	2	4	2	3	1	7	1	2	1	1	1	2	2	1	1	1	1	2	1	1	2	1	1	1
4133	670	1	29	2	5	1	2	3	3	6	1	2	1	1	0	2	3	1	1	1	2	2	1	2	2	1	2	2
4134	52	5	30	2	1	5	2	2	1	5	1	1	2	2	0	2	2	1	1	2	2	2	2	2	2	2	2	2
4141	503	1	28	2	1	5	2	3	3	5	1	2	1	2	0	2	1	1	1	1	1	1	1	1	1	1	1	1
4143	542	1	25	2	4	2	2	2	2	7	2	2	2	2	1	2	1	1	1	1	1	1	1	1	1	1	1	1
4150	664	1	35	1	5	1	2	3	2	7	1	2	1	1	1	2	1	1	1	1	1	1	1	1	1	1	1	1
4156	204	3	22	3	2	4	2	3	3	6	1	2	1	2	0	2	1	1	1	1	1	1	1	1	1	1	2	1
4157	762	1	23	3	3	3	2	2	1	6	1	2	1	2	0	2	2	1	1	1	1	1	1	1	1	1	1	1
4159	501	1	34	2	7	1	2	2	1	5	1	2	1	1	0	2	2	1	1	1	1	1	1	1	1	1	1	1
4171	729	1	27	2	1	5	1	2	1	6	1	2	1	2	0	2	2	1	1	1	1	1	1	1	1	1	1	1
4173	76	4	20	3	2	4	1	3	1	6	1	2	1	2	2	2	1	1	1	1	2	2	1	2	2	1	2	2
4174	389	1	22	3	3	3	2	1	1	5	1	2	1	2	1	2	2	1	1	1	2	2	1	2	2	1	2	2
4175	535	1	31	2	3	3	2	1	1	5	1	2	1	2	0	2	2	1	1	1	1	1	1	1	1	1	1	1
4176	360	2	22	3	1	5	2	1	1	6	1	2	1	2	0	2	2	1	1	1	1	1	1	1	1	1	1	1
4177	69	5	28	2	2	4	2	1	1	5	2	2	2	1	0	2	2	1	1	2	2	2	2	2	2	2	2	2
4178	237	3	25	2	2	4	2	1	1	5	2	2	2	1	0	2	2	1	1	1	1	1	1	1	1	1	1	1
4204	162	3	21	3	2	4	1	1	1	5	2	2	1	1	0	2	2	1	1	1	1	1	1	1	1	1	1	1
4206	248	3	20	3	1	5	1	3	2	7	1	2	1	2	2	2	2	1	1	1	1	2	1	1	2	1	1	2
4207	165	3	31	2	1	5	2	2	2	6	2	2	1	2	0	2	2	1	1	1	1	1	1	1	1	1	1	1
4210	40	6	25	2	6	1	2	3	1	7	1	2	1	2	0	2	2	1	1	2	2	2	2	2	2	2	2	1
4211	73	4	31	2	3	3	2	3	3	7	1	2	2	1	2	3	3	1	1	1	2	2	2	2	2	2	2	2
4213	175	3	39	1	5	1	2	1	1	7	2	2	1	2	0	2	2	1	1	1	1	1	1	1	1	1	1	1
4214	644	1	35	1	5	1	2	3	2	7	2	1	2	2	0	3	3	1	1	1	1	1	1	1	1	1	1	1
4221	422	1	33	2	5	1	2	3	1	5	1	2	1	2	0	2	2	1	1	1	1	1	1	1	1	1	1	1
4224	380	1	29	2	3	3	2	1	1	6	1	2	1	2	0	2	2	1	1	1	1	1	1	1	1	1	1	1
4228	284	2	34	2	1	5	2	3	3	6	2	2	2	1	0	2	2	1	1	1	1	1	1	1	1	1	1	1
4231	43	5	27	2	4	2	2	1	1	5	1	1	2	1	0	2	2	1	1	1	1	2	1	1	2	1	1	1
4232	397	1	22	3	1	5	2	3	3	6	1	2	1	1	0	2	1	1	1	1	1	1	1	1	1	1	1	1
4233	152	3	27	2	2	4	2	1	3	5	1	2	1	2	0	2	2	1	1	1	1	2	1	1	2	1	1	2
4236	356	2	30	2	4	2	2	3	2	6	1	2	1	1	0	2	2	1	1	1	1	1	1	1	1	1	1	1
4237	315	2	26	2	4	2	2	1	1	5	2	1	2	2	0	2	2	1	1	1	1	1	1	1	1	1	1	1
4238	192	3	26	2	1	5	2	1	1	5	1	2	1	1	0	2	2	1	1	1	1	1	1	1	1	1	1	1
4244	218	3	21	3	1	5	2	3	2	7	2	2	2	2	0	2	2	1	1	1	1	1	1	1	1	1	1	1
4246	75	4	24	3	1	5	2	1	1	7	2	2	1	2	0	2	2	1	1	1	2	2	1	2	2	1	2	2
4249	664	1	26	2	3	3	2	2	2	6	1	2	2	1	0	2	1	1	1	1	1	1	1	1	1	1	1	1
4250	464	1	27	2	3	3	2	1	1	5	1	2	1	2	0	2	2	1	1	1	1	1	1	1	1	1	1	1
4274	556	1	28	2	2	4	2	3	1	5	1	2	1	1	0	2	2	1	1	1	1	1	1	1	1	1	1	1
4275	511	1	25	2	1	5	2	3	3	6	1	2	1	1	0	2	2	1	1	1	1	1	1	1	1	1	1	1
4277	304	2	23	3	2	4	2	3	2	7	2	2	1	1	0	3	3	1	1	1	1	1	1	1	1	1	1	1
4279	563	1	26	2	2	4	2	3	1	6	1	2	1	1	1	2	3	1	1	1	1	1	1	1	1	1	1	1
4280	117	3	28	2	2	4	2	1	1	5	1	2	1	1	0	2	2	1	1	1	1	1	1	1	1	1	1	1
4281	621	1	25	2	1	5	2	1	1	5	1	2	1	1	0	2	2	1	1	1	1	1	1	1	1	1	1	1
4282	272	2	40	1	2	4	2	2	2	6	2	2	1	1	0	2	2	1	1	1	1	1	1	1	1	1	1	1
4283	96	4	20	3	1	5	2	1	1	5	2	2	1	2	2	2	2	1	1	1	2	2	1	1	2	1	1	2
4285	320	2	29	2	2	4	2	1	1	5	1	2	1	1	0	2	2	1	1	1	1	1	1	1	1	1	1	1
4298	661	1	20	3	1	5	2	2	2	5	1	2	1	1	0	2	2	1	1	2	2	2	2	2	2	2	2	2
4321	210	3	22	3	2	4	2	2	1	5	1	2	1	2	0	2	2	1	1	1	1	1	1	1	1	1	1	1
4325	78	4	19	3	5	1	2	3	3	7	1	2	1	2	0	2	1	1	1	2	2	2	2	2	2	2	2	2
4326	64	5	19	3	1	5	2	2	1	6	1	2	1	2	2	2	2	1	1	1	2	2	2	2	2	2	2	2
4329	383	1	22	3	3	3	2	3	3	7	2	2	1	2	0	2	2	1	1	1	1	2	1	1	2	1	1	2
4331	24	6	35	1	3	3	2	1	1	5	1	2	1	1	0	2	2	1	1	2	2	2	2	2	2	2	2	1
4337	111	3	32	2	1	5	2	1	1	5	1	2	1	1	0	2	2	1	1	1	1	2	1	1	2	1	1	2
4339	713	1	21	3	1	5	2	1	2	5	1	2	1	2	0	2	2	1	1	1	1	1	1	1	1	1	1	1
4340	469	1	32	2	3	3	2	1	2	6	1	2	1	1	2	2	2	1	1	1	1	2	1	1	2	1	1	2
4341	524	1	30	2	2	4	2	1	1	7	2	1	2	2	0	2	3	1	1	1	1	2	1	1	2	1	1	2
4343	477	1	33	2	4	2	2	3	3	9	2	2	1	2	1	2	2	1	1	2	2	2	2	2	2	2	2	2
4345	603	1	37	1	3	3	2	3	1	8	2	2	2	2	0	2	1	1	1	1	2	2	1	2	2	1	2	2
4348	455	1	26	2	2	4	2	3	3	9	2	2	2	2	0	2	1	1	1	1	2	2	1	2	2	1	2	2
4349	465	1	32	2	2	4	2	2	3	8	1	2	1	2	2	2	1	1	1	1	1	2	1	1	2	1	1	2
4350	229	3	32	2	2	4	2	2	2	8	1	2	1	2	0	2	1	1	1	1	1	2	1	1	2	1	1	2
8341	710	1	33	2	3	3	4	1	2	5	1	2	1	2	0	2	1	1	1	1	1	1	1	1	1	1	1	1
8342	150	3	27	2	2	4	4	2	2	5	1	2	1	2	0	2	2	1	1	1	1	2	1	1	2	1	1	2
8344	388	1	24	3	2	4	4	1	2	5	1	2	1	2	0	2	1	1	1	1	1	1	1	1	1	1	1	1
8345	450	1	22	3	1	5	4	2	2	6	1	2	1	2	0	2	2	1	1	1	1	1	1	1	1	1	1	1
8346	150	3	32	2	3	3	4	2	2	6	1	2	1	2	0	2	2	1	1	1	1	2	1	1	2	1	1	2
8347	338	2	22	3	3	3	4	1	1	5	1	2	1	2	0	2	1	1	1	1	1	1	1	1	1	1	1	1
8349	269	3	40	1	3	3	4	1	2	5	1	2	1	2	0	2	1	1	1	1	1	1	1	1	1	1	1	1
8386	78	4	20	3	2	4	4	3	3	6	1	2	1	1	0	3	3	1	1	1	2	2	2	1	2	1	2	2
8402	206	3	30	2	2	4	4	3	3	9	2	2	2	2	1	2	2	1	1	1	1	1	1	1	1	1	1	1
8410	221	3	20	3	2	4	4	3	3	7	2	2	2	1	0	2	2	1	1	1	1	1	1	1	1	1	1	1
8421	158	3	30	2	2	4	4	3	3	9	2	2	2	2	0	2	2	1	1	1	1	2	1	1	2	1	1	2
8422	284	2	36	1	3	3	4	3	3	8	2	2	2	2	0	2	2	1	1	1	1	1	1	1	1	1	1	1
8443	68	5	27	2	6	1	4	3	2	7	2	2	2	2	0	3	3	1	1	1	2	2	1	2	2	1	2	1
8444	434	1	25	2	3	3	4	3	3	7	2	2	2	2	0	3	3	1	1	1	1	1	1	1	1	1	1	1
8449	761	1	20	3	1	5	4	3	3	6	2	2	2	1	0	2	2	1	1	1	1	1	1	1	1	1	1	1
5004	282	2	26	2	2	4	4	1	2	7	1	2	1	1	0	2	2	1	1	1	1	1	1	1	1	1	1	1
5005	349	2	34	2	8	1	4	3	2	7	1	2	1	1	1	3	3	1	1	1	1	1	1	1	1	1	1	1
5006	341	2	27	2	2	4	4	3	1	5	2	2	2	2	0	2	2	1	1	1	1	1	1	1	1	1	1	1
5007	555	1	24	3	2	4	4	3	1	7	2	2	1	1	1	3	3	1	1	1	1	1	1	1	1	1	1	1
5009	579	1	20	3	1	5	4	2	2	6	1	2	1	1	0	2	2	1	1	1	1	1	1	1	1	1	1	1
5042	426	1	29	2	7	1	4	3	3	8	1	2	1	2	0	2	2	1	1	1	1	1	1	1	1	1	1	1
5051	326	2	25	2	3	3	4	2	1	7	2	2	1	1	0	2	1	1	1	1	1	1	1	1	1	1	1	1
5065	126	3	30	2	3	3	4	3	2	8	2	2	2	2	2	2	2	1	1	2	2	2	2	2	2	2	2	2
5069	241	3	20	3	1	5	4	1	1	7	2	2	1	1	1	2	2	1	1	1	1	1	1	1	1	1	1	1
5071	50	5	29	2	5	1	4	2	3	9	2	2	1	1	0	2	2	1	1	2	2	2	2	2	2	2	2	2
5081	439	1	35	1	4	2	4	3	3	9	2	2	1	2	2	2	2	1	1	1	1	1	1	1	1	1	1	1
5086	381	1	25	2	1	5	4	3	3	7	2	1	2	1	0	2	2	1	1	1	1	1	1	1	1	1	1	1
5102	217	3	15	3	1	5	4	2	3	8	2	1	2	2	2	3	3	1	1	1	1	1	1	1	1	1	1	1
5104	221	3	36	1	6	1	4	3	1	8	2	2	2	2	2	3	3	1	1	1	1	1	1	1	1	1	1	1
5122	192	3	29	2	5	1	4	3	3	9	2	2	2	2	0	3	3	1	1	1	1	1	1	1	1	1	1	1
5141	192	3	37	1	1	5	4	2	1	7	2	2	2	2	0	2	2	1	1	1	1	1	1	1	1	1	1	1
5144	257	3	21	3	3	3	4	3	1	9	2	1	2	2	0	2	2	1	1	1	1	1	1	1	1	1	1	1
5162	80	4	26	2	6	1	4	3	3	9	2	2	2	2	2	2	1	1	1	2	2	2	2	2	2	2	2	2
5167	361	2	17	3	1	5	4	3	2	8	2	2	2	2	0	2	2	1	1	1	1	2	1	1	2	1	1	2
5183	122	3	26	2	4	2	4	2	3	8	1	1	2	2	2	3	3	1	1	1	2	2	1	2	2	1	2	2
5210	424	1	24	3	3	3	4	3	1	6	1	2	1	2	0	2	2	1	1	1	1	1	1	1	1	1	1	1
5225	225	3	15	3	1	5	4	2	1	8	2	2	2	2	1	3	3	1	1	1	1	1	1	1	1	1	1	1
5229	116	3	25	2	2	4	4	3	3	6	1	2	1	2	0	3	3	1	1	1	1	2	1	1	2	1	1	2
5266	86	4	19	3	1	5	4	3	1	9	2	2	2	2	2	2	2	1	1	1	2	2	2	2	2	2	2	2
5301	233	3	32	2	5	1	4	2	1	7	1	2	1	1	1	3	3	1	1	1	1	1	1	1	1	1	1	1
5304	37	6	19	3	1	5	4	2	1	7	1	2	1	1	0	2	2	1	1	2	2	2	2	2	2	2	2	1
5305	192	3	24	3	2	4	4	3	2	8	1	2	1	1	0	2	2	1	1	1	1	2	1	1	2	1	1	2
5309	321	2	31	2	3	3	4	2	2	8	2	2	2	2	0	2	1	1	1	1	1	1	1	1	1	1	1	1
5322	346	2	18	3	2	4	4	3	1	8	1	2	1	1	2	2	3	1	1	1	1	1	1	1	1	1	1	1
5324	98	3	32	2	7	1	4	1	1	9	1	2	1	2	0	2	3	1	1	1	2	2	1	2	2	1	2	2
5328	254	3	21	3	2	4	4	3	3	9	1	2	1	2	2	2	3	1	1	1	1	1	1	1	1	1	1	1
8081	217	3	34	2	2	4	4	1	3	6	1	2	2	2	0	2	2	1	1	1	1	1	1	1	1	1	1	1
8086	642	1	24	3	2	4	4	3	2	7	1	2	1	2	0	2	2	1	1	1	2	2	1	2	2	1	2	2
8102	152	3	24	3	3	3	4	3	2	7	1	2	1	2	2	2	1	1	1	2	2	2	2	2	2	2	2	2
8104	208	3	22	3	2	4	4	3	1	7	2	2	1	2	1	2	1	1	1	1	2	2	1	2	2	1	2	2
8105	231	3	20	3	1	5	4	3	3	8	2	2	1	2	1	2	1	1	1	1	2	2	1	2	2	1	2	2
8106	168	3	21	3	2	4	4	2	2	7	2	2	1	2	1	2	2	1	1	1	1	2	1	1	2	1	1	2
8142	90	4	35	1	8	1	4	3	1	5	1	2	1	1	0	2	2	1	1	2	2	2	2	2	2	2	2	2
8144	103	3	24	3	2	4	4	3	2	8	1	2	1	1	0	3	3	1	1	1	2	2	1	2	2	1	2	2
8146	108	3	22	3	1	5	4	3	2	7	1	2	2	2	0	2	2	1	1	1	1	2	1	1	2	1	1	2
8471	209	3	25	2	1	5	4	3	3	8	1	1	2	2	0	2	1	1	1	1	2	2	1	2	2	1	2	2
8485	203	3	23	3	3	3	4	3	3	9	1	2	1	2	2	2	1	1	1	1	1	2	1	1	2	1	1	2
8486	273	2	25	2	3	3	4	3	3	8	1	2	1	2	1	2	1	1	1	1	1	1	1	1	1	1	1	1
8487	268	3	25	2	7	1	4	3	1	7	1	2	1	1	0	2	2	1	1	1	1	1	1	1	1	1	1	1
8550	490	1	35	1	9	1	4	3	1	9	1	2	1	2	1	2	2	1	1	1	1	1	1	1	1	1	1	1
8564	208	3	40	1	3	3	4	3	1	7	1	2	1	1	0	2	2	1	1	1	1	1	1	1	1	1	1	1
8565	340	2	27	2	3	3	4	3	1	7	1	2	1	2	0	2	2	1	1	1	1	1	1	1	1	1	1	1
8570	146	3	26	2	5	1	4	3	3	7	1	2	1	2	2	2	2	1	1	1	1	1	1	1	1	1	1	1
8628	57	5	27	2	4	2	4	3	3	8	2	2	2	2	0	3	3	1	1	2	2	2	2	2	2	2	2	2
8647	551	1	22	3	2	4	4	1	1	8	1	2	1	2	1	2	1	1	1	1	1	1	1	1	1	1	1	1
8724	247	3	30	2	5	1	4	1	1	6	2	2	2	2	0	2	2	1	1	1	1	2	1	1	2	1	1	2
8727	302	2	28	2	2	4	4	1	1	5	1	2	2	2	0	2	2	1	1	1	1	1	1	1	1	1	1	1
8728	40	6	30	2	4	2	4	1	1	6	1	2	2	2	0	2	2	1	1	2	2	2	2	2	2	2	2	1
5342	356	2	20	3	1	5	4	3	3	8	2	2	2	2	0	3	3	1	1	2	2	2	2	2	2	2	2	2
5343	364	2	38	1	6	1	4	3	2	9	1	2	2	2	0	2	1	1	1	1	2	2	2	2	2	2	2	2
5347	432	1	46	1	6	1	4	2	2	7	2	2	2	2	0	2	2	1	1	1	1	1	1	1	1	1	1	1
5350	299	2	23	3	1	5	4	3	2	7	1	2	1	2	2	3	3	1	1	1	2	2	1	2	2	1	2	2
5366	61	5	34	2	7	1	4	3	2	7	2	2	1	2	2	3	3	1	1	2	2	2	2	2	2	2	2	2
5367	646	1	34	2	4	2	4	3	1	7	1	2	1	2	2	2	2	1	1	1	1	1	1	1	1	1	1	1
5382	578	1	34	2	3	3	4	2	1	7	2	2	2	2	2	3	3	1	1	1	1	2	1	1	2	1	1	2
5402	560	1	39	1	6	1	4	1	1	8	2	2	2	1	0	2	2	1	1	1	1	2	1	1	2	1	1	2
5405	103	3	28	2	1	5	4	3	3	8	1	2	2	1	1	2	2	1	1	1	2	2	1	2	2	1	2	2
5422	168	3	26	2	2	4	4	2	3	8	2	2	1	2	0	3	3	1	1	1	1	1	1	1	1	1	1	1
5425	553	1	25	2	5	1	4	2	2	7	1	2	2	1	1	2	1	1	1	1	1	1	1	1	1	1	1	1
5427	200	3	24	3	3	3	4	3	2	7	2	2	2	2	0	3	3	1	1	1	1	1	1	1	1	1	1	1
5428	190	3	24	3	2	4	4	3	3	7	1	2	2	2	0	3	3	1	1	1	1	1	1	1	1	1	1	1
5442	173	3	29	2	3	3	4	3	2	8	2	1	2	2	1	2	2	1	1	1	1	1	1	1	1	1	1	1
5444	102	3	32	2	5	1	4	2	1	7	2	1	2	1	2	3	3	1	1	1	1	1	1	1	1	1	1	1
5445	512	1	25	2	2	4	4	2	1	7	2	1	2	2	2	2	1	1	1	1	1	1	1	1	1	1	1	1
5446	133	3	23	3	1	5	4	2	1	7	2	2	1	1	1	2	3	1	1	1	1	1	1	1	1	1	1	1
5449	557	1	35	1	1	5	4	3	2	7	2	1	2	1	1	2	1	1	1	1	2	2	1	2	2	1	2	2
5467	173	3	32	2	9	1	4	3	1	7	2	2	1	1	1	2	2	1	1	1	1	1	1	1	1	1	1	1
5468	319	2	23	3	1	5	4	3	1	7	1	2	2	2	0	2	2	1	1	1	1	1	1	1	1	1	1	1
5470	173	3	30	2	3	3	4	3	1	7	2	2	2	2	0	2	2	1	1	1	1	1	1	1	1	1	1	1
5483	282	2	21	3	3	3	4	2	1	6	1	2	1	2	0	2	2	1	1	1	1	1	1	1	1	1	1	1
5484	265	3	29	2	2	4	4	3	2	7	2	2	2	2	0	3	3	1	1	1	1	1	1	1	1	1	1	1
5505	256	3	18	3	1	5	4	3	1	7	2	2	2	2	0	2	1	1	1	1	1	1	1	1	1	1	1	1
5506	479	1	30	2	6	1	4	3	3	7	1	2	1	1	0	2	2	1	1	1	1	2	1	1	2	1	1	2
5508	107	3	32	2	1	5	4	3	1	7	1	2	1	2	2	2	1	1	1	1	1	1	1	1	1	1	1	1
5509	411	1	30	2	4	2	4	3	2	8	1	2	1	2	1	2	2	1	1	1	1	2	1	1	2	1	1	2
8823	41	6	33	2	2	4	4	2	1	6	2	2	2	2	0	2	2	1	1	1	2	2	1	2	2	1	2	1
8830	147	3	25	2	2	4	4	3	2	6	2	2	2	2	2	2	2	1	1	1	2	2	1	2	2	1	2	2
8861	178	3	38	1	4	2	4	1	1	8	1	2	1	2	2	2	2	1	1	1	1	2	1	1	2	1	1	2
8862	372	1	24	3	3	3	4	3	3	8	1	2	1	2	2	2	2	1	1	2	2	2	2	2	2	2	2	2
8866	108	3	22	3	2	4	4	1	1	6	2	2	1	2	0	2	2	1	1	2	2	2	2	2	2	2	2	2
8869	723	1	24	3	2	4	4	3	3	9	1	2	1	2	2	2	2	1	1	2	2	2	2	2	2	2	2	2
8870	65	5	34	2	3	3	4	3	3	9	1	2	1	2	2	2	2	1	1	1	2	2	1	2	2	1	2	1
8882	190	3	25	2	1	5	4	3	2	9	2	2	2	2	0	2	2	1	1	1	2	2	1	2	2	1	2	2
8888	538	1	25	2	2	4	4	3	3	9	2	2	2	2	1	2	1	1	1	1	1	1	1	1	1	1	1	1
8889	545	1	26	2	1	5	4	2	2	9	1	2	1	2	1	2	1	1	1	2	2	2	2	2	2	2	2	2
8890	138	3	42	1	5	1	4	3	3	9	2	2	2	2	0	2	2	1	1	1	1	1	1	1	1	1	1	1
8921	243	3	24	3	2	4	4	3	3	9	1	2	1	2	0	2	2	1	1	1	1	1	1	1	1	1	1	1
8922	573	1	32	2	4	2	4	3	1	8	1	2	2	2	0	2	2	1	1	1	1	1	1	1	1	1	1	1
8923	203	3	30	2	2	4	4	3	1	7	1	2	2	2	0	2	1	1	1	1	1	1	1	1	1	1	1	1
8925	203	3	29	2	2	4	4	2	2	8	1	2	1	2	0	2	2	1	1	1	1	1	1	1	1	1	1	1
8929	703	1	26	2	4	2	4	3	1	9	1	2	1	2	0	2	2	1	1	1	1	1	1	1	1	1	1	1
8930	165	3	20	3	1	5	4	3	3	8	1	2	1	2	0	2	2	1	1	1	1	2	1	1	2	1	1	2
8945	46	5	22	3	1	5	4	3	1	6	1	2	1	2	0	2	2	1	1	1	2	2	2	2	2	2	2	2
8961	51	5	24	3	4	2	4	3	3	8	1	2	1	2	0	2	2	1	1	2	2	2	2	2	2	2	2	2
8962	86	4	28	2	5	1	4	3	3	8	1	1	2	1	1	3	3	1	1	1	2	2	1	2	2	1	2	2
8963	88	4	22	3	1	5	4	3	1	8	1	2	1	1	0	2	1	1	1	1	2	2	1	2	2	1	2	2
8968	437	1	22	3	4	2	4	3	1	7	1	1	2	1	0	2	2	1	1	1	1	1	1	1	1	1	1	1
5541	178	3	27	2	3	3	4	3	3	9	2	2	1	2	1	2	2	1	1	1	2	2	1	2	2	1	2	2
5550	320	2	35	1	4	2	4	3	3	8	2	2	2	2	1	2	2	1	1	1	2	2	1	2	2	1	2	2
5551	206	3	27	2	2	4	4	3	3	9	2	1	2	2	1	2	2	1	1	1	1	2	1	1	2	1	1	2
5586	344	2	24	3	3	3	4	3	1	8	2	1	2	2	1	2	1	1	1	1	1	1	1	1	1	1	1	1
5587	363	2	20	3	1	5	4	3	2	9	2	2	2	2	2	2	1	1	1	1	1	1	1	1	1	1	1	1
5588	131	3	25	2	2	4	4	3	3	9	2	2	2	2	1	2	1	1	1	1	2	2	1	2	2	1	2	2
5621	247	3	26	2	4	2	4	2	2	7	2	2	2	2	2	2	3	1	1	1	1	2	1	1	2	1	1	2
5625	302	2	29	2	3	3	4	2	2	8	1	2	2	2	0	2	2	1	1	1	1	1	1	1	1	1	1	1
5649	679	1	34	2	1	5	4	2	1	7	2	2	2	1	1	2	2	1	1	1	1	1	1	1	1	1	1	1
5669	495	1	24	3	1	5	4	3	3	9	2	2	2	2	2	3	3	1	1	1	1	2	1	1	2	1	1	2
5761	74	4	30	2	2	4	4	3	3	9	1	1	2	2	2	2	2	1	1	1	2	2	2	2	2	2	2	2
8982	258	3	30	2	4	2	4	3	2	9	2	2	1	2	2	3	3	1	1	1	2	2	1	2	2	1	2	2
8985	84	4	40	1	9	1	4	3	1	9	2	2	1	2	0	3	3	1	1	2	2	2	2	2	2	2	2	2
8988	301	2	35	1	3	3	4	3	3	9	1	2	1	2	0	3	3	1	1	1	2	2	1	2	2	1	2	2
9022	248	3	26	2	2	4	4	2	1	6	1	2	1	1	0	2	2	1	1	1	1	1	1	1	1	1	1	1
9023	340	2	19	3	1	5	4	2	1	6	1	2	1	1	0	2	1	1	1	1	1	1	1	1	1	1	1	1
9081	214	3	35	1	9	1	4	3	2	8	1	2	1	2	0	2	2	1	1	2	2	2	2	2	2	2	2	2
9082	325	2	33	2	4	2	4	3	3	8	2	2	1	2	0	2	2	1	1	1	1	1	1	1	1	1	1	1
9083	229	3	31	2	5	1	4	3	3	9	2	2	1	2	0	2	2	1	1	2	2	2	2	2	2	2	2	2
9085	296	2	23	3	1	5	4	3	2	7	2	2	1	2	0	2	2	1	1	1	1	1	1	1	1	1	1	1
9086	239	3	27	2	3	3	4	3	3	9	1	2	1	2	1	2	2	1	1	2	2	2	2	2	2	2	2	2
9088	488	1	33	2	1	5	4	3	3	9	1	2	1	2	1	2	2	1	1	1	1	1	1	1	1	1	1	1
9090	248	3	23	3	1	5	4	3	3	9	2	2	1	2	0	1	2	1	1	2	2	2	2	2	2	2	2	2
9128	163	3	30	2	2	4	4	3	1	5	1	2	1	2	1	2	2	1	1	2	2	2	2	2	2	2	2	2
9129	382	1	31	2	5	1	4	3	1	6	1	2	1	2	0	2	2	1	1	1	1	1	1	1	1	1	1	1
9141	264	3	35	1	5	1	4	3	1	9	2	2	2	2	2	3	3	1	1	1	1	1	1	1	1	1	1	1
9143	281	2	30	2	2	4	4	3	2	8	2	2	2	1	0	2	2	1	1	1	1	1	1	1	1	1	1	1
9147	264	3	30	2	3	3	4	3	3	9	2	2	2	2	0	3	3	1	1	1	1	1	1	1	1	1	1	1
9148	300	2	25	2	1	5	4	3	3	9	2	2	2	2	0	2	2	1	1	1	1	1	1	1	1	1	1	1
9149	267	3	25	2	4	2	4	3	2	9	2	2	2	2	0	3	3	1	1	1	1	1	1	1	1	1	1	1
9161	373	1	29	2	3	3	4	3	2	9	2	2	1	2	0	2	1	1	1	1	1	1	1	1	1	1	1	1
9164	124	3	28	2	6	1	4	3	3	9	2	2	2	2	2	2	2	1	1	1	2	2	1	2	2	1	2	2
9165	174	3	30	2	7	1	4	3	3	9	2	2	2	2	2	2	3	1	1	1	1	1	1	1	1	1	1	1
9186	465	1	29	2	3	3	4	3	3	7	2	2	1	2	0	2	2	1	1	1	1	1	1	1	1	1	1	1
9204	73	4	24	3	1	5	4	3	3	9	2	2	2	2	1	2	1	1	1	1	1	2	1	1	2	1	1	1
9224	139	3	30	2	5	1	4	3	2	8	2	2	1	2	0	3	3	1	1	1	2	2	1	2	2	1	2	2
9225	139	3	24	3	4	2	4	3	1	8	2	2	1	2	0	2	2	1	1	1	1	2	1	1	2	1	1	2
9228	82	4	22	3	1	5	4	2	3	8	2	2	1	2	0	2	2	1	1	2	2	2	2	2	2	2	2	2
9229	90	4	28	2	3	3	4	3	3	8	2	2	1	2	1	2	2	1	1	1	2	2	1	2	2	1	2	2
9230	307	2	24	3	4	2	4	3	3	9	1	2	1	2	1	3	3	1	1	1	1	1	1	1	1	1	1	1
5881	643	1	28	2	3	3	4	2	1	8	1	1	2	2	2	2	2	1	1	1	1	1	1	1	1	1	1	1
5882	258	3	27	2	5	1	4	1	2	7	2	2	1	2	0	3	3	1	1	1	1	1	1	1	1	1	1	1
5883	571	1	31	2	3	3	4	2	1	6	1	2	2	2	0	3	3	1	1	1	1	1	1	1	1	1	1	1
5884	291	2	20	3	1	5	4	1	1	7	1	2	1	2	0	2	2	1	1	1	1	1	1	1	1	1	1	1
5885	676	1	25	2	2	4	4	2	1	8	1	2	2	2	2	2	2	1	1	1	1	1	1	1	1	1	1	1
5887	457	1	20	3	2	4	4	1	1	7	1	1	2	2	1	2	2	1	1	1	1	1	1	1	1	1	1	1
5890	216	3	19	3	1	5	4	3	2	8	1	1	2	1	2	3	3	1	1	1	2	2	1	2	2	1	2	2
5921	138	3	31	2	4	2	4	3	1	8	2	2	1	2	0	2	2	2	2	2	2	2	2	2	2	2	2	2
5961	348	2	28	2	6	1	4	3	1	9	1	2	1	1	0	3	3	1	1	1	1	1	1	1	1	1	1	1
5963	156	3	23	3	2	4	4	3	2	8	2	2	1	1	0	2	2	1	1	1	1	2	1	1	2	1	1	2
5966	194	3	24	3	2	4	4	3	3	8	1	2	1	2	2	2	2	1	1	1	2	2	1	2	2	1	2	2
5968	159	3	23	3	3	3	4	3	1	9	1	2	1	1	2	2	2	1	1	1	1	2	1	1	2	1	1	2
5969	358	2	25	2	7	1	4	3	2	9	1	2	1	1	0	2	2	1	1	1	2	2	1	2	2	1	2	2
5970	192	3	25	2	3	3	4	3	1	9	1	2	1	2	2	2	2	1	1	1	1	2	1	1	2	1	1	2
6001	552	1	18	3	2	4	4	3	1	7	1	1	2	2	0	2	2	1	1	1	1	1	1	1	1	1	1	1
6002	545	1	25	2	1	5	4	2	1	6	1	1	2	1	0	2	2	1	2	2	2	2	2	2	2	2	2	2
6010	48	5	29	2	3	3	4	3	2	8	2	2	1	2	0	2	2	1	1	2	2	2	2	2	2	2	2	2
6021	598	1	17	3	1	5	4	1	1	5	1	2	1	1	1	2	2	1	1	1	1	1	1	1	1	1	1	1
6023	562	1	33	2	5	1	4	2	1	7	1	2	1	2	1	2	2	1	1	1	1	1	1	1	1	1	1	1
6025	176	3	37	1	8	1	4	3	1	7	1	2	1	2	1	2	2	1	1	1	1	1	1	1	1	1	1	1
6027	191	3	34	2	3	3	4	3	1	7	2	2	1	2	1	3	2	1	1	1	1	2	1	1	2	1	1	2
6028	690	1	22	3	1	5	4	1	1	6	2	2	1	2	0	2	2	1	1	1	1	1	1	1	1	1	1	1
6029	125	3	28	2	2	4	4	3	1	6	2	2	1	2	1	2	2	1	1	1	2	2	1	2	2	1	2	2
6030	328	2	43	1	10	1	4	3	3	7	2	2	1	2	0	3	3	1	1	1	1	1	1	1	1	1	1	1
6042	142	3	20	3	2	4	2	3	2	8	2	1	2	2	0	3	3	1	1	1	2	2	1	2	2	1	2	2
6061	57	5	32	2	1	5	4	1	1	6	1	2	1	1	2	3	3	1	1	1	2	2	1	2	2	2	2	1
6066	280	2	31	2	4	2	4	2	2	7	1	2	1	1	0	2	2	1	1	1	1	1	1	1	1	1	1	1
6068	349	2	27	2	3	3	4	3	1	7	1	2	1	2	2	2	2	1	1	1	1	1	1	1	1	1	1	1
6106	257	3	29	2	1	5	4	2	1	5	1	2	1	1	0	2	2	1	1	1	1	1	1	1	1	1	1	1
6108	121	3	19	3	2	4	4	3	1	7	1	2	1	1	0	3	3	1	1	1	1	1	1	1	1	1	1	1
6121	85	4	30	2	3	3	4	3	3	9	2	2	2	2	0	3	3	1	1	1	2	2	1	2	2	1	2	2
6123	290	2	22	3	1	5	4	3	3	9	2	2	1	2	2	3	3	1	1	1	1	2	1	1	2	1	1	2
6124	97	4	27	2	6	1	4	3	1	9	2	2	2	2	0	2	2	1	1	1	1	2	1	1	2	1	1	1
6126	31	6	19	3	1	5	4	2	1	8	2	2	2	2	0	2	2	1	1	2	2	2	2	2	2	2	2	1
6128	197	3	44	1	8	1	4	3	3	9	2	2	1	2	2	2	2	1	1	2	2	2	2	2	2	2	2	2
6147	659	1	20	3	2	4	4	2	2	8	1	2	1	2	0	1	3	1	1	1	1	2	1	1	2	1	1	2
6150	142	3	26	2	4	2	4	2	1	7	2	1	2	2	2	1	1	1	1	2	2	2	1	2	2	1	2	2
6162	654	1	29	2	1	5	4	1	1	8	1	2	1	2	0	2	2	1	1	1	1	1	1	1	1	1	2	2
6164	448	1	27	2	1	5	4	2	3	8	2	2	1	2	0	2	2	1	1	1	1	1	1	1	1	1	1	1
6165	622	1	25	2	2	4	4	1	1	7	2	2	1	2	2	2	2	1	1	1	1	1	1	1	1	1	1	1
6168	9	6	25	2	4	2	4	3	2	9	2	2	1	2	0	3	3	1	1	2	2	2	2	2	2	2	2	1
6169	295	2	28	2	4	2	4	3	2	8	2	2	1	2	1	2	2	1	1	1	1	1	1	1	1	1	1	1
6170	241	3	26	2	2	4	4	3	1	8	1	2	1	2	1	2	2	1	1	1	1	1	1	1	1	1	1	1
6181	151	3	20	3	1	5	4	3	2	6	2	2	2	2	0	2	2	1	1	1	1	2	1	1	2	1	1	2
6184	373	1	22	3	3	3	4	3	2	9	2	2	2	2	0	2	2	1	1	1	2	2	1	1	2	1	1	2
6185	132	3	25	2	3	3	4	1	3	8	1	1	2	2	0	2	2	1	1	1	1	1	1	1	1	1	1	1
6187	237	3	22	3	2	4	4	1	1	6	1	2	1	1	0	2	2	1	1	1	1	1	1	1	1	1	1	1
6188	209	3	21	3	1	5	4	1	1	7	2	2	2	2	0	2	2	1	1	1	1	1	1	1	1	1	1	1
6189	78	4	34	2	3	3	4	1	1	7	1	1	2	1	0	2	2	1	1	1	2	2	1	2	2	1	2	2
6190	585	1	35	1	4	2	4	1	1	6	1	2	1	1	0	2	2	1	1	1	1	1	1	1	1	1	1	1
6222	173	3	24	3	4	2	4	3	3	9	2	1	2	2	1	2	2	1	1	1	2	2	1	2	2	1	2	2
6223	398	1	19	3	2	4	4	3	2	8	2	2	2	2	1	2	2	1	1	1	1	1	1	1	1	1	1	1
6283	738	1	26	2	3	3	4	3	3	7	2	2	1	2	0	3	3	1	1	1	1	1	1	1	1	1	1	1
6309	177	3	29	2	1	5	4	3	3	9	1	2	1	2	0	3	3	2	2	1	1	2	1	1	2	1	1	2
6343	130	3	37	1	2	4	4	1	2	8	2	1	2	2	2	2	2	1	1	1	1	2	1	1	2	1	1	2
6362	551	1	35	1	6	1	4	3	3	8	2	1	2	2	2	3	3	1	1	1	1	1	1	1	1	1	1	1
6364	419	1	22	3	1	5	4	1	1	8	1	1	2	2	2	2	2	1	1	1	1	1	1	1	1	1	1	1
6365	268	3	30	2	1	5	4	3	3	8	2	1	2	2	2	2	2	1	1	1	1	2	1	1	2	1	1	2
6401	386	1	24	3	6	1	4	3	2	9	2	1	2	2	0	3	3	1	1	1	1	1	1	1	1	1	1	1
6402	216	3	30	2	6	1	4	3	2	9	1	2	2	2	2	2	2	1	1	1	1	1	1	1	1	1	1	1
6407	722	1	32	2	2	4	4	3	1	8	2	2	2	1	0	3	3	1	1	1	1	1	1	1	1	1	1	1
6410	267	3	28	2	2	4	4	3	2	9	2	2	2	2	0	3	3	1	1	1	1	1	1	1	1	1	1	1
6441	145	3	29	2	2	4	4	3	3	9	1	2	2	2	1	2	2	2	2	2	2	2	2	2	2	2	2	2
6443	540	1	29	2	1	5	4	3	3	9	1	2	2	1	1	2	2	1	1	2	2	2	2	2	2	2	2	2
9261	608	1	30	2	4	2	4	2	1	7	1	2	2	2	0	2	2	1	1	1	1	1	1	1	1	1	1	1
9265	408	1	22	3	2	4	4	2	2	8	2	2	2	2	0	2	2	1	1	2	2	2	2	2	2	2	2	2
9268	134	3	25	2	1	5	4	3	1	6	1	2	1	1	0	2	1	1	1	1	1	2	1	1	2	1	1	2
9301	98	3	28	2	6	1	4	3	2	7	1	2	1	2	0	3	3	1	1	1	1	2	1	1	2	1	1	2
9302	257	3	18	3	2	4	4	3	2	6	2	2	2	2	0	2	1	1	1	1	1	1	1	1	1	1	1	1
9303	288	2	25	2	4	2	4	2	2	6	2	2	2	2	0	2	2	1	1	1	1	1	1	1	1	1	1	1
9305	393	1	36	1	3	3	4	3	3	7	1	2	1	2	0	3	3	1	1	1	1	1	1	1	1	1	1	1
9306	678	1	42	1	7	1	4	3	3	7	1	1	2	2	0	2	2	1	1	1	1	1	1	1	1	1	1	1
9307	113	3	19	3	1	5	4	1	1	6	1	2	1	2	2	2	3	1	1	1	2	2	1	2	2	1	2	2
9309	480	1	30	2	1	5	4	3	2	6	2	2	2	2	0	2	2	1	1	1	1	1	1	1	1	1	1	1
9310	425	1	25	2	4	2	4	2	3	6	2	2	2	2	0	2	2	1	1	1	1	1	1	1	1	1	1	1
9323	220	3	19	3	1	5	4	3	3	7	2	2	2	2	0	2	2	1	1	1	1	1	1	1	1	1	1	1
9325	298	2	20	3	1	5	4	1	1	7	1	2	1	2	0	2	1	1	1	1	1	1	1	1	1	1	1	1
9327	561	1	26	2	1	5	4	2	3	6	1	2	1	2	0	2	1	1	1	1	1	1	1	1	1	1	1	1
6507	360	2	23	3	1	5	4	3	3	7	2	2	1	2	0	3	3	1	1	1	1	1	1	1	1	1	1	1
6541	337	2	42	1	5	1	4	3	2	9	1	2	1	2	0	2	2	1	1	1	1	1	1	1	1	1	1	1
6546	309	2	29	2	3	3	4	3	2	7	1	2	1	2	0	2	2	1	1	1	1	1	1	1	1	1	1	1
6570	167	3	25	2	6	1	4	3	3	9	2	2	2	2	1	3	3	1	1	2	2	2	2	2	2	2	2	2
6586	449	1	36	1	5	1	4	3	1	7	2	2	1	2	2	2	2	1	1	1	1	1	1	1	1	1	1	1
6587	126	3	24	3	2	4	4	3	1	7	1	2	1	2	0	2	2	1	1	1	1	1	1	1	1	1	1	1
6589	665	1	23	3	2	4	4	3	2	7	2	2	1	2	2	2	2	1	1	1	1	1	1	1	1	1	1	1
6590	529	1	26	2	2	4	4	3	2	8	2	2	1	2	2	3	3	1	1	1	1	1	1	1	1	1	1	1
6604	552	1	28	2	3	3	4	3	3	9	1	2	1	2	0	3	3	1	1	1	1	1	1	1	1	1	1	1
9505	406	1	25	2	2	4	4	3	3	9	2	2	1	2	2	3	3	1	1	1	1	1	1	1	1	1	1	1
9508	499	1	35	1	6	1	4	3	1	9	2	1	2	2	2	3	3	1	1	1	1	1	1	1	1	1	1	1
9510	152	3	32	2	5	1	4	3	1	9	2	2	1	2	1	3	3	1	1	1	1	1	1	1	1	1	1	1
9581	317	2	21	3	1	5	4	3	3	9	2	2	1	2	0	3	3	1	1	1	1	1	1	1	1	1	1	1
9766	526	1	17	3	2	4	4	3	3	9	1	2	2	2	2	2	1	1	1	1	2	2	1	2	2	1	2	2
9786	173	3	25	2	2	4	4	3	1	8	1	2	2	2	0	3	3	1	1	2	2	2	1	2	2	1	2	2
9788	126	3	22	3	3	3	4	3	3	9	2	1	2	2	0	3	3	1	1	1	2	2	1	2	2	1	2	2
9789	154	3	25	2	3	3	4	3	3	9	2	1	2	2	2	3	3	1	1	1	2	2	1	2	2	1	2	2
6648	81	4	21	3	2	4	4	3	1	7	1	2	1	2	0	2	2	1	1	1	2	2	1	2	2	1	2	2
6670	237	3	28	2	1	5	4	2	3	8	2	2	2	2	0	2	2	1	1	1	1	2	1	1	2	1	1	2
[truncated: 255 more rows]
